# Supplementary material for: Synthesis of a heparin-related GlcN–IdoA sulfation-site variable disaccharide library and analysis by Raman and ROA spectroscopy
Source: PubMed Central journal article supplement (PMC4245711; doi:10.1016/j.carres.2014.06.026), 2014-12-05

# SUPPORTING INFORMATION

## Synthesis of a heparin-related GlcN-IdoA sulfation-site variable disaccharide library and analysis by Raman and ROA spectroscopy

Gavin J. Miller,<sup>a</sup> Steen U. Hansen,<sup>a</sup> Marek Baráth,<sup>a§</sup> Christian Johannessen,<sup>b^</sup> Ewan Blanch,<sup>b</sup> Gordon C. Jayson<sup>c</sup> and John M. Gardiner<sup>a\*</sup>

<sup>a</sup>*Manchester Institute of Biotechnology and School of Chemistry, 131 Princess Street, University of Manchester M1 7DN, UK.*

<sup>b</sup>*Manchester Institute of Biotechnology, 131 Princess Street, University of Manchester M1 7DN, UK.*

<sup>c</sup>*School of Cancer and Enabling Sciences, Wilmslow Road, University of Manchester UK, M20 4BX.*

*\*Corresponding author. Email: gardiner@manchester.ac.uk*

### 1. General Experimental

All the chemicals used were purchased from commercial sources without further purification. Heparin was purchased from Sigma-Aldrich and used without further purification. All reactions were monitored by TLC on Merck silica gel plates <sup>60</sup>F<sub>254</sub>. Silica gel 60 (particle size 0.035-0.070 mm) was used for column chromatography. <sup>1</sup>H NMR spectra were recorded at 400 MHz and <sup>13</sup>C spectra at 100 MHz on Bruker DPX spectrometers. Mass spectra (MS) were recorded using a Micromass Platform II spectrometer using an electrospray ionization source or via the EPSRC National Mass Spectrometry Service (Swansea). Optical rotations were obtained using an AA-1000 polarimeter. Elemental analyses were performed by Micro Analytical Laboratory, School of Chemistry, The University of Manchester. NMR Data were reprocessed using iNMR 4 from Nucleomatica and Topspin.

## 2. <sup>1</sup>H, <sup>13</sup>C NMR and COSY Spectral Data for compounds 4-18

### Methyl 6-*O*-acetyl-2-azido-3-*O*-benzyl-2-deoxy-4-*O*-*p*-methoxybenzyl- $\alpha$ -D-glucopyranosyl-(1 $\rightarrow$ 4)-(methyl 2-*O*-benzoyl-3-*O*-benzyl- $\alpha$ -L-idopyranoside) uronate 4

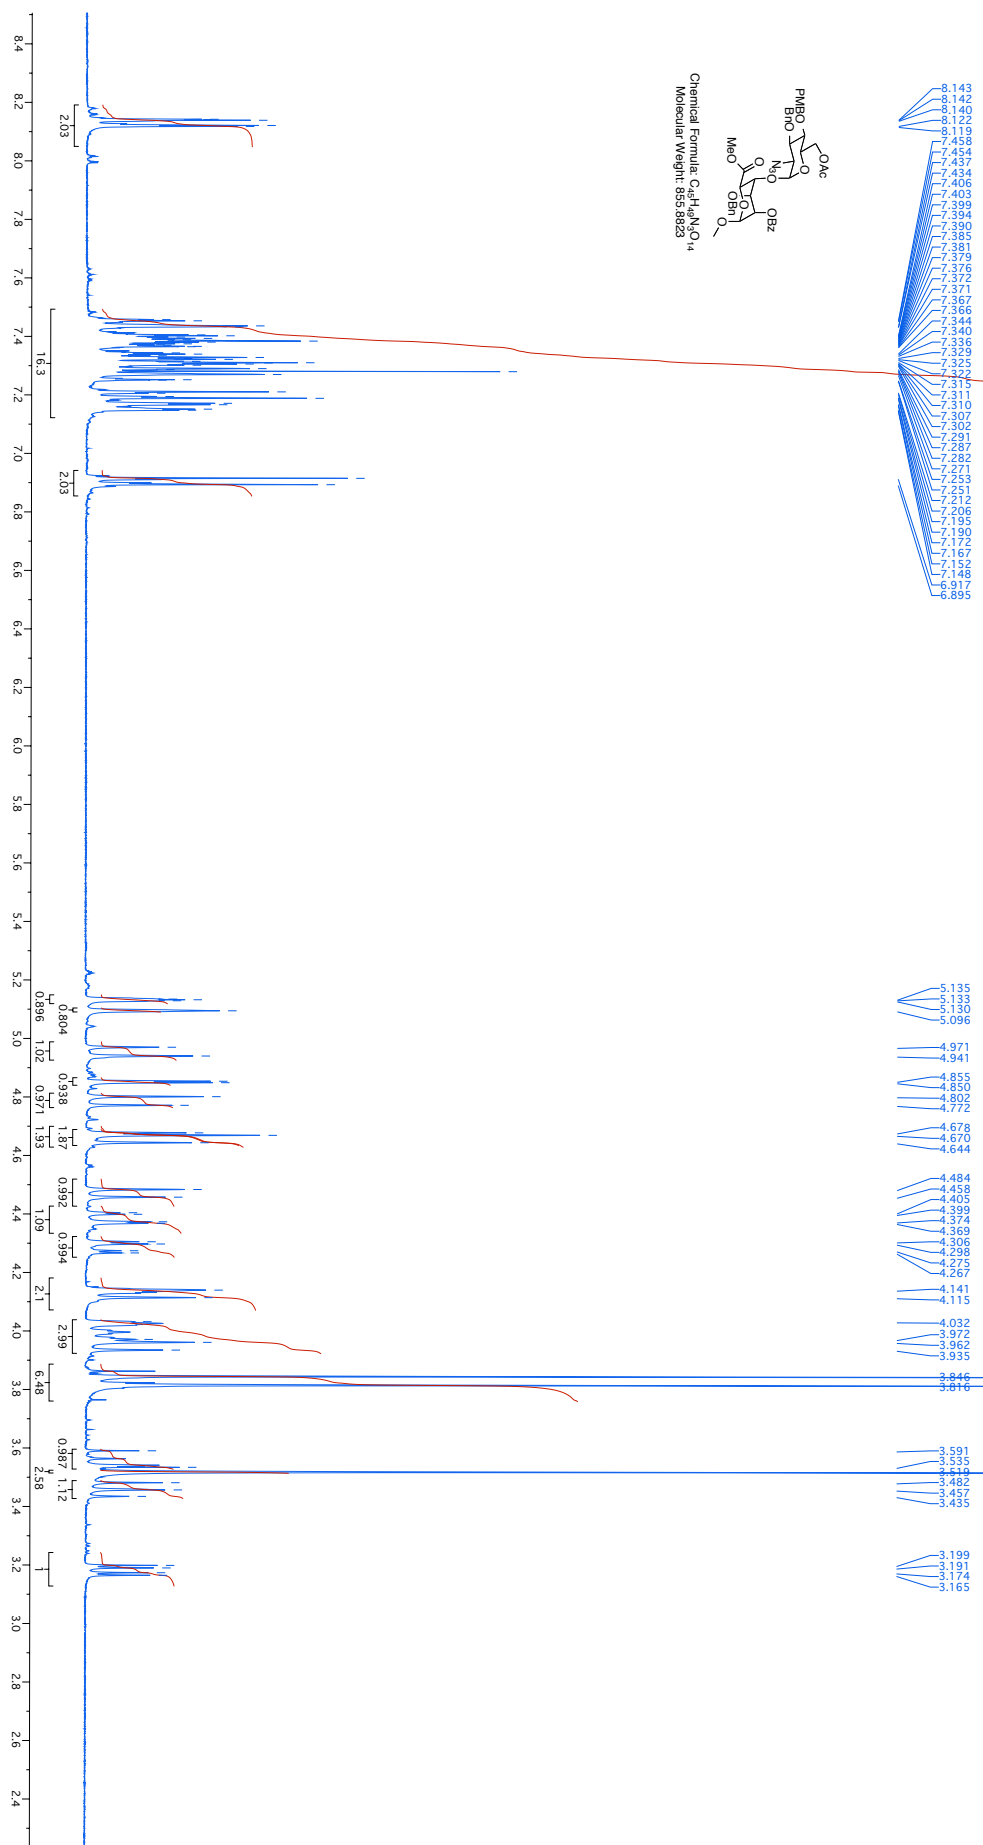

**Methyl 6-*O*-acetyl-2-azido-3-*O*-benzyl-2-deoxy-4-*O*-*p*-methoxybenzyl- $\alpha$ -D-glucopyranosyl-(1 $\rightarrow$ 4)-(methyl 2-*O*-benzoyl-3-*O*-benzyl- $\alpha$ -L-idopyranoside) uronate 4**

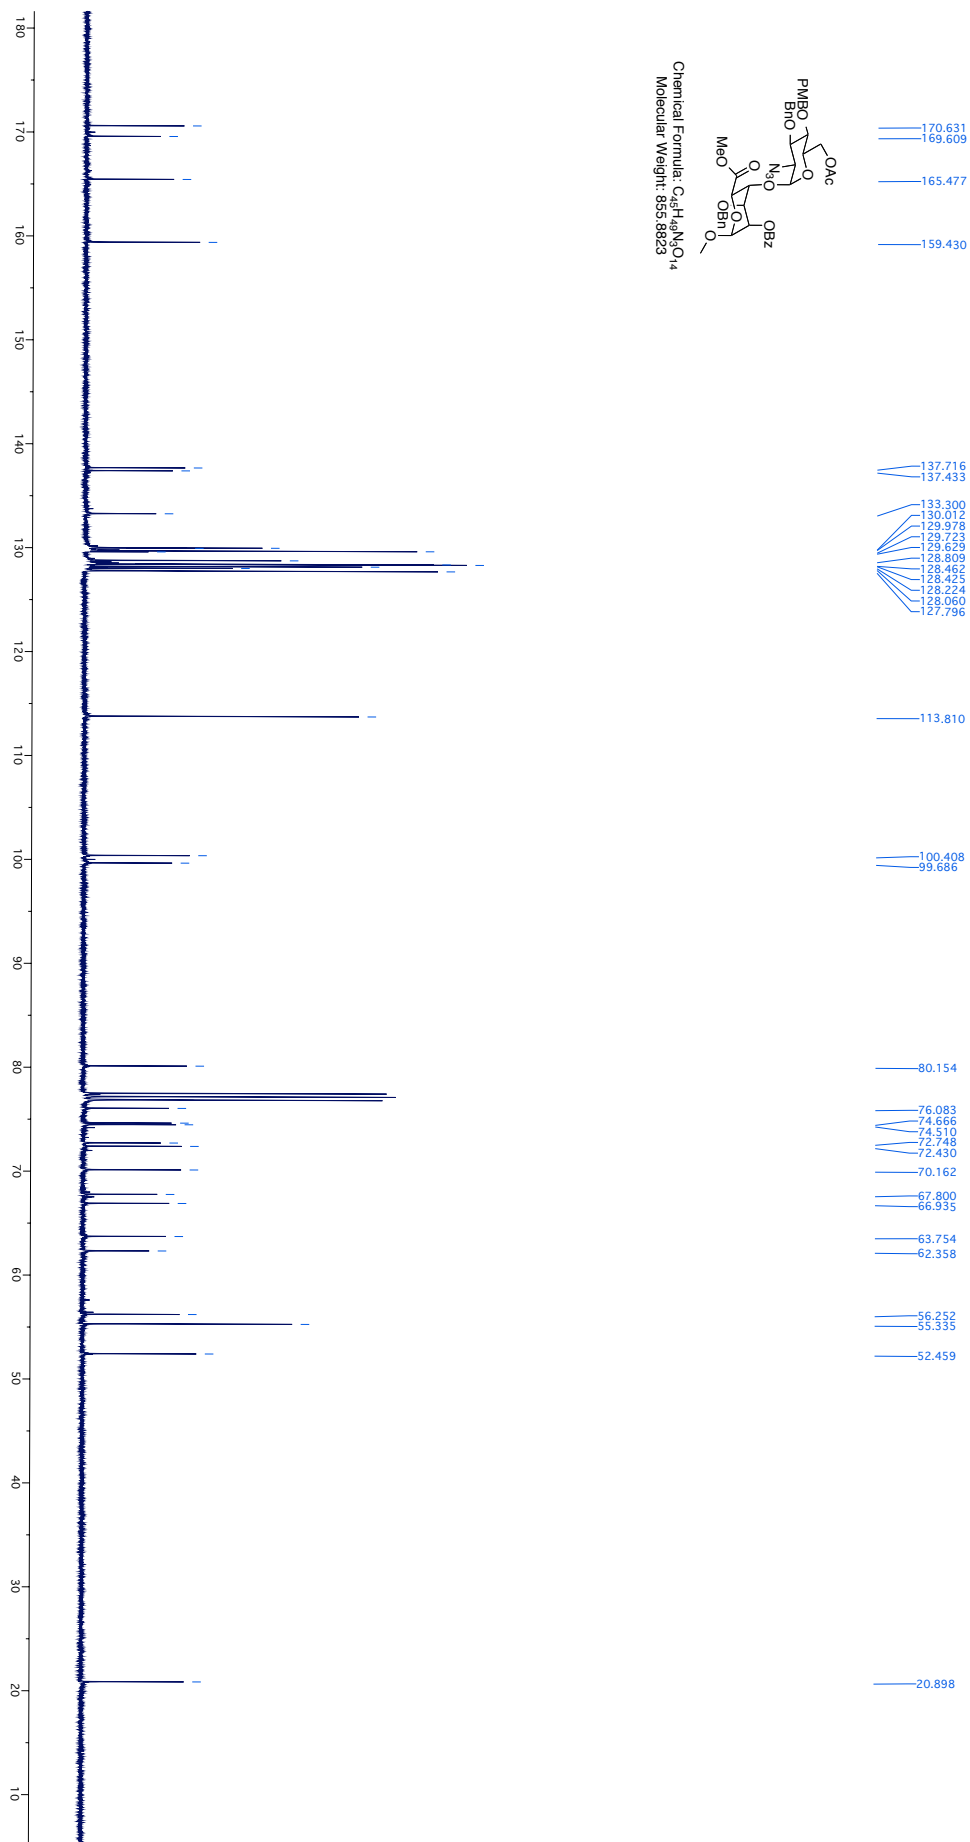

**Methyl 6-*O*-acetyl-2-azido-3-*O*-benzyl-2-deoxy-4-*O*-*p*-methoxybenzyl- $\alpha$ -D-glucopyranosyl-(1 $\rightarrow$ 4)-(methyl 2-*O*-benzoyl-3-*O*-benzyl- $\alpha$ -L-idopyranoside) uronate 4**

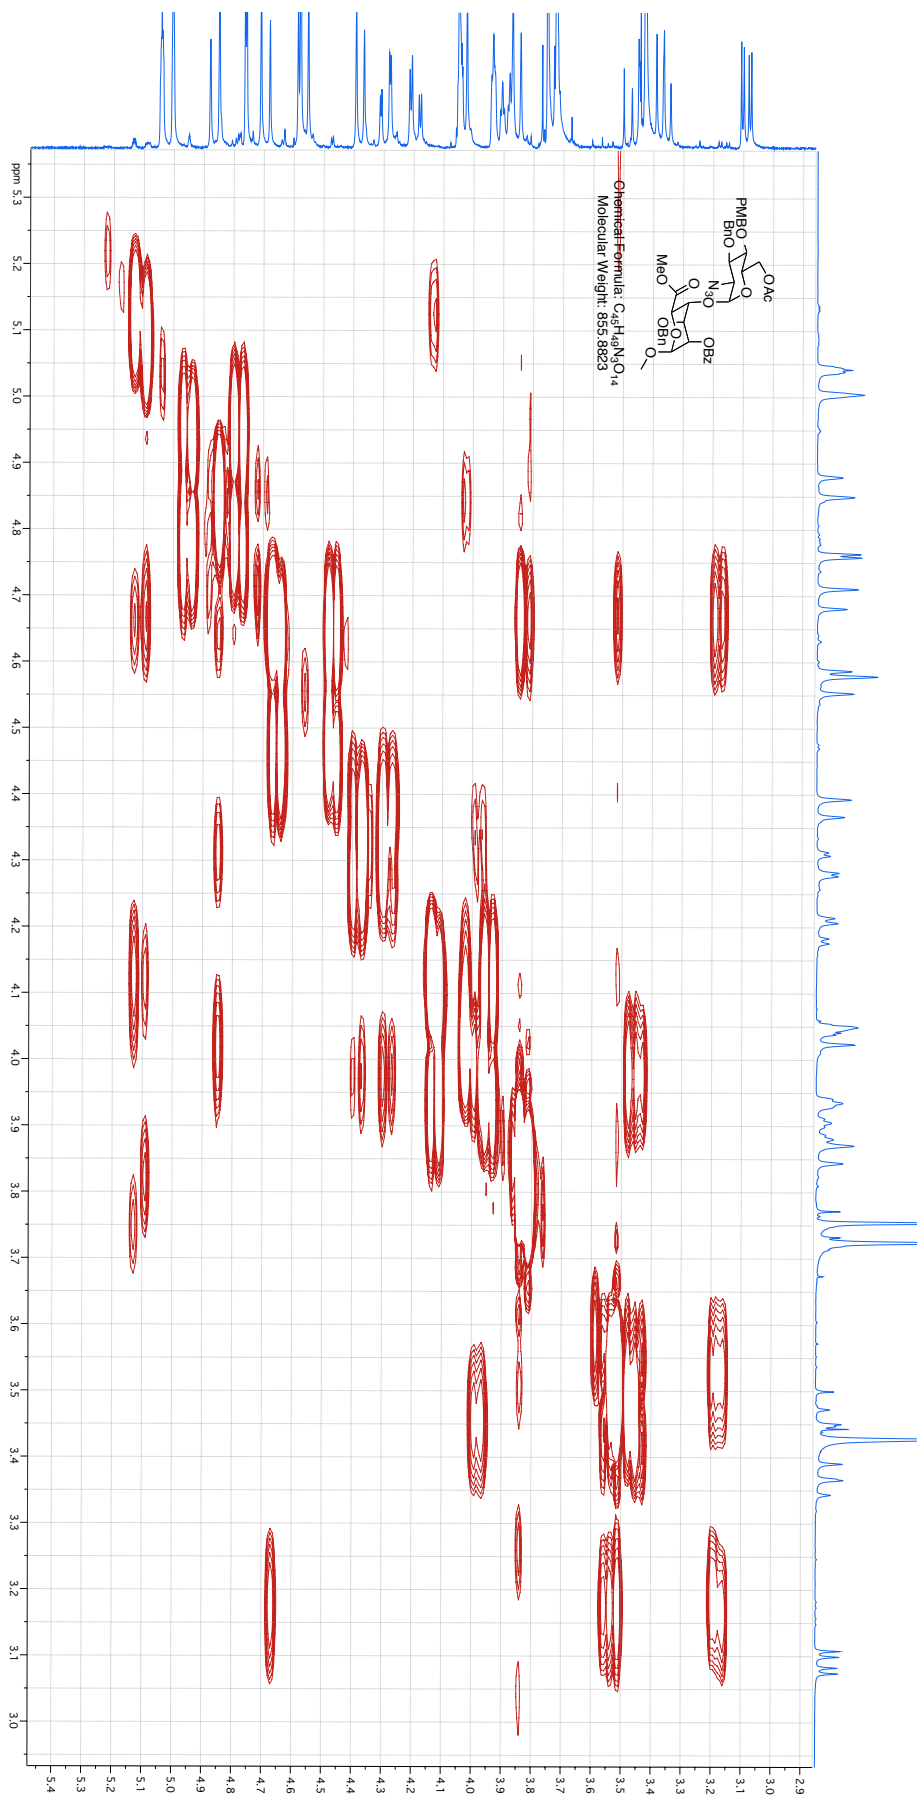

**Methyl 2-azido-3,6-di-O-benzyl-2-deoxy-4-O-p-methoxybenzyl- $\alpha$ -D-glucopyranosyl-(1 $\rightarrow$ 4)-(methyl 2-O-benzoyl-3-O-benzyl- $\alpha$ -L-idopyranoside) uronate 6**

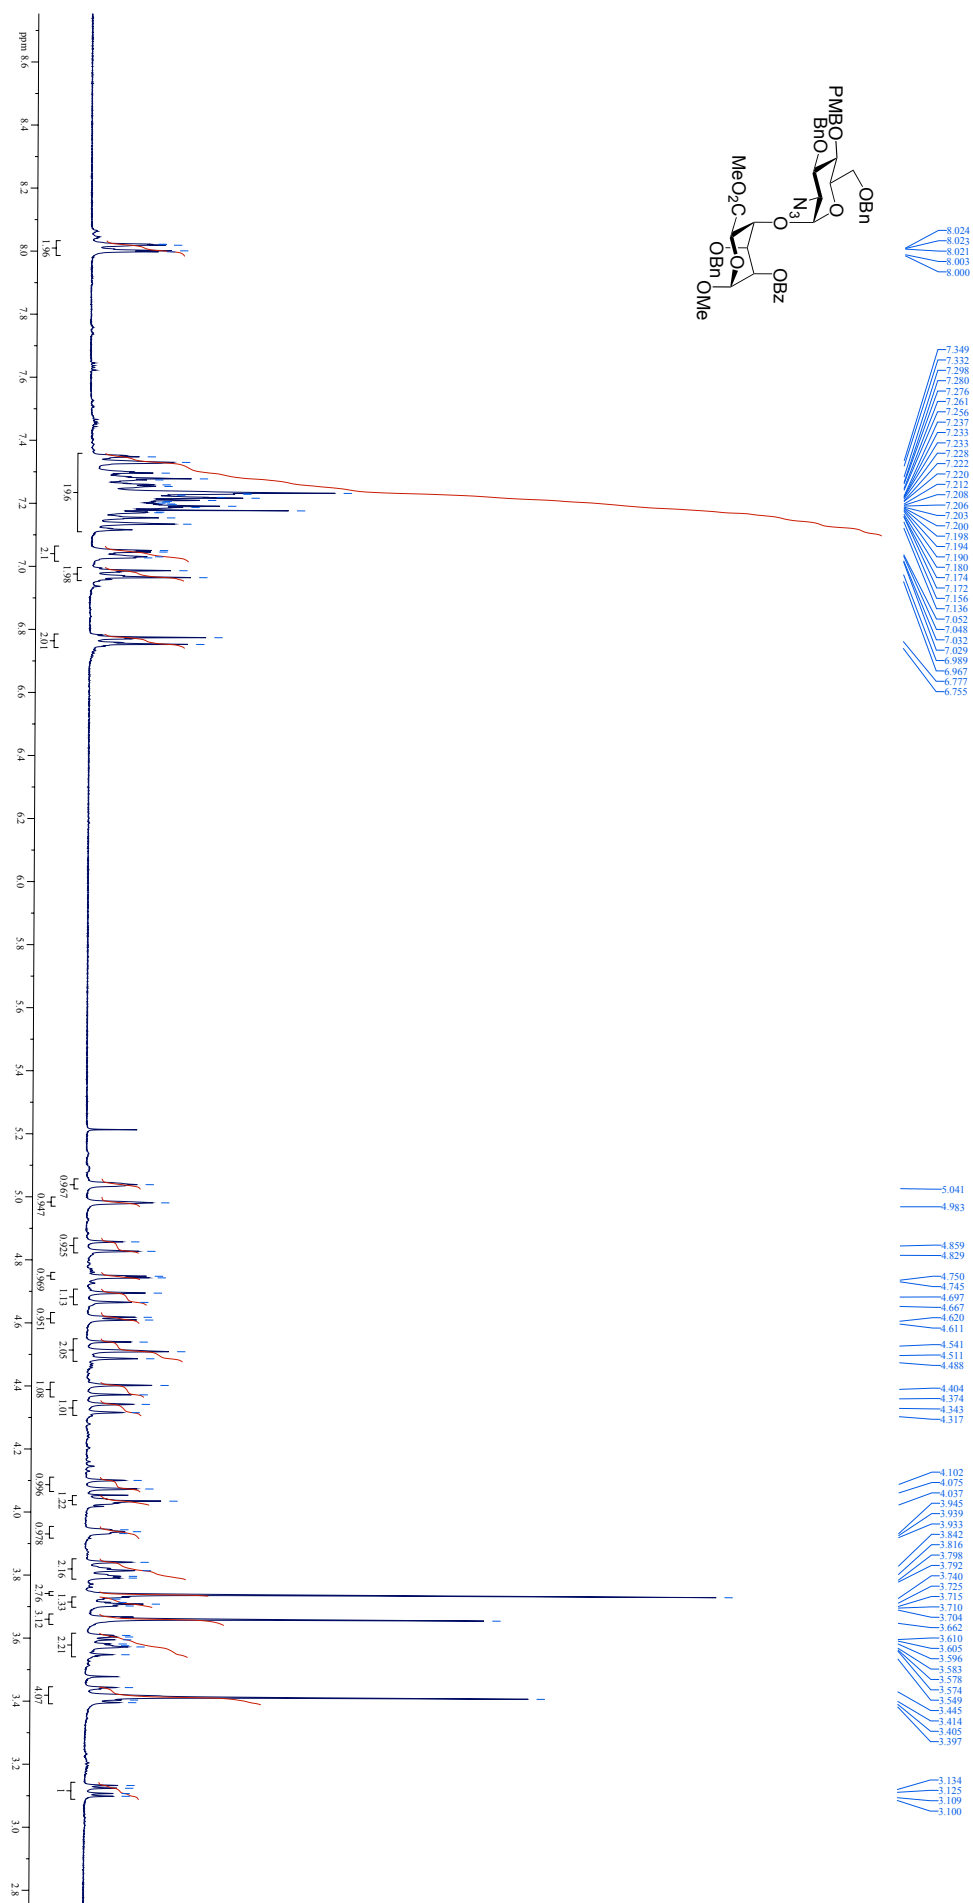

**Methyl 2-azido-3,6-di-O-benzyl-2-deoxy-4-O-p-methoxybenzyl- $\alpha$ -D-glucopyranosyl-(1 $\rightarrow$ 4)-  
(methyl 2-O-benzoyl-3-O-benzyl- $\alpha$ -L-idopyranoside) uronate 6**

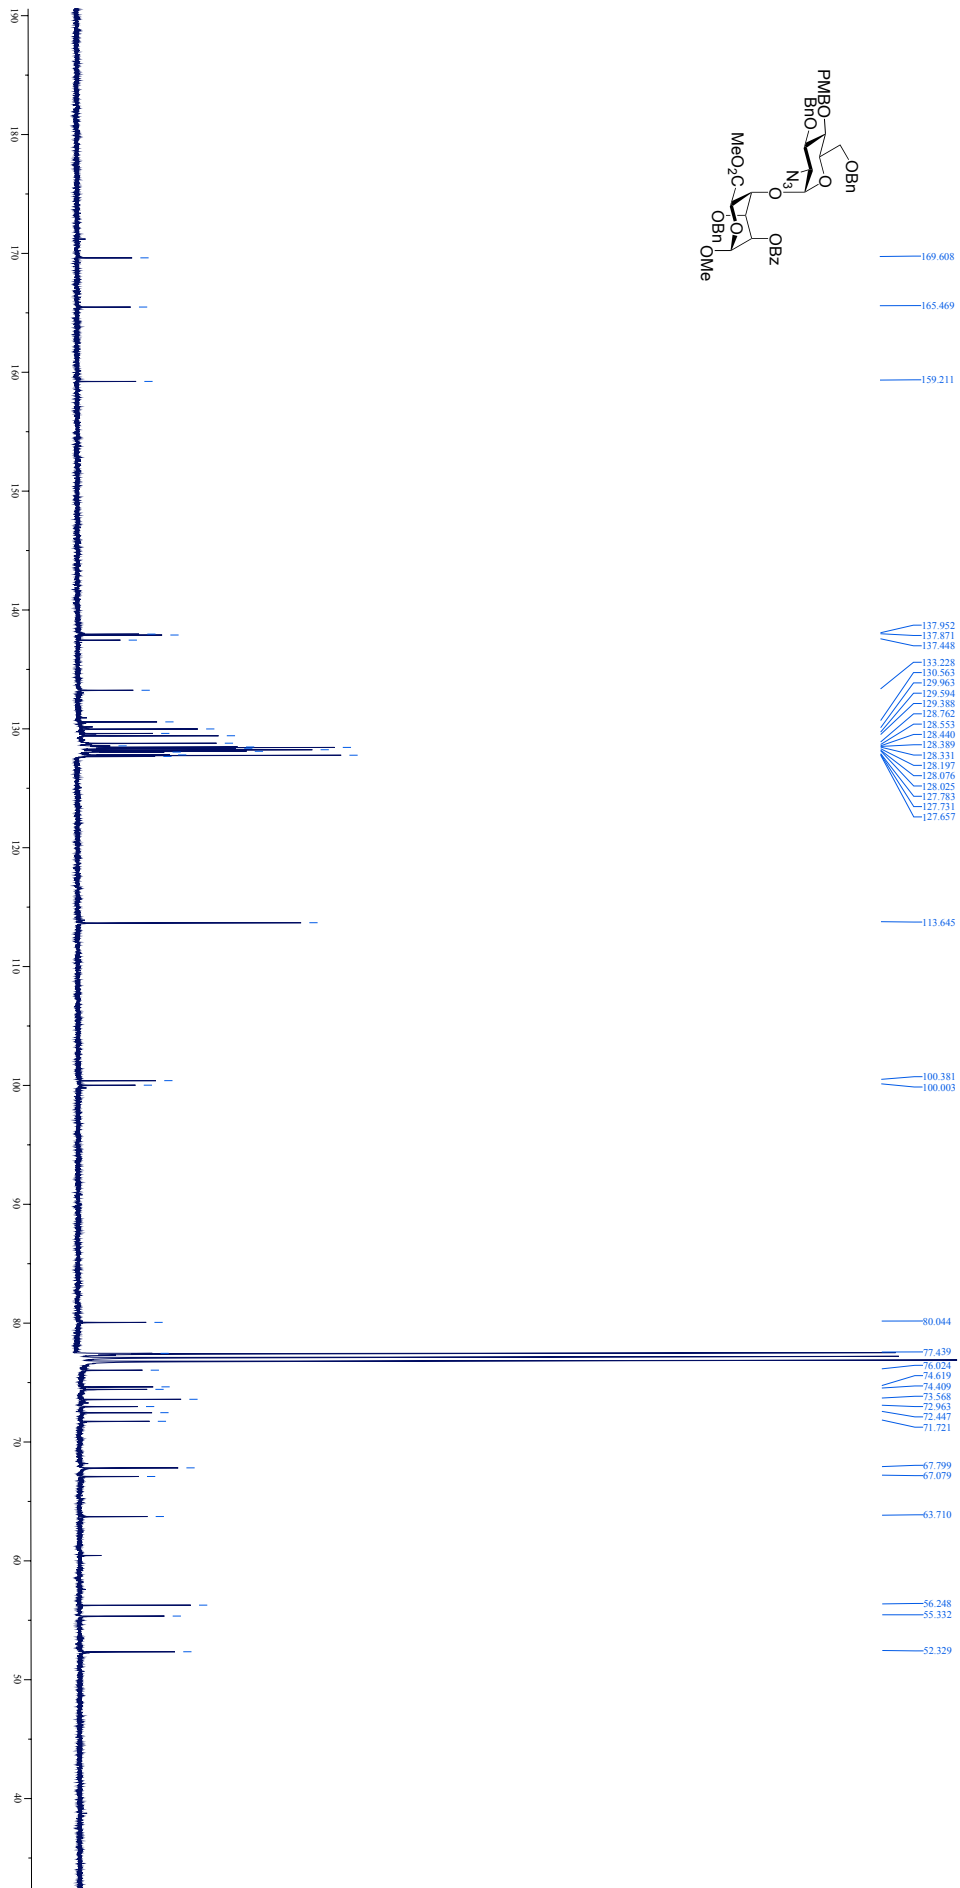

**Methyl 2-azido-3,6-di-O-benzyl-2-deoxy-4-O-p-methoxybenzyl- $\alpha$ -D-glucopyranosyl-(1 $\rightarrow$ 4)-  
(methyl 2-O-benzoyl-3-O-benzyl- $\alpha$ -L-idopyranoside) uronate 6**

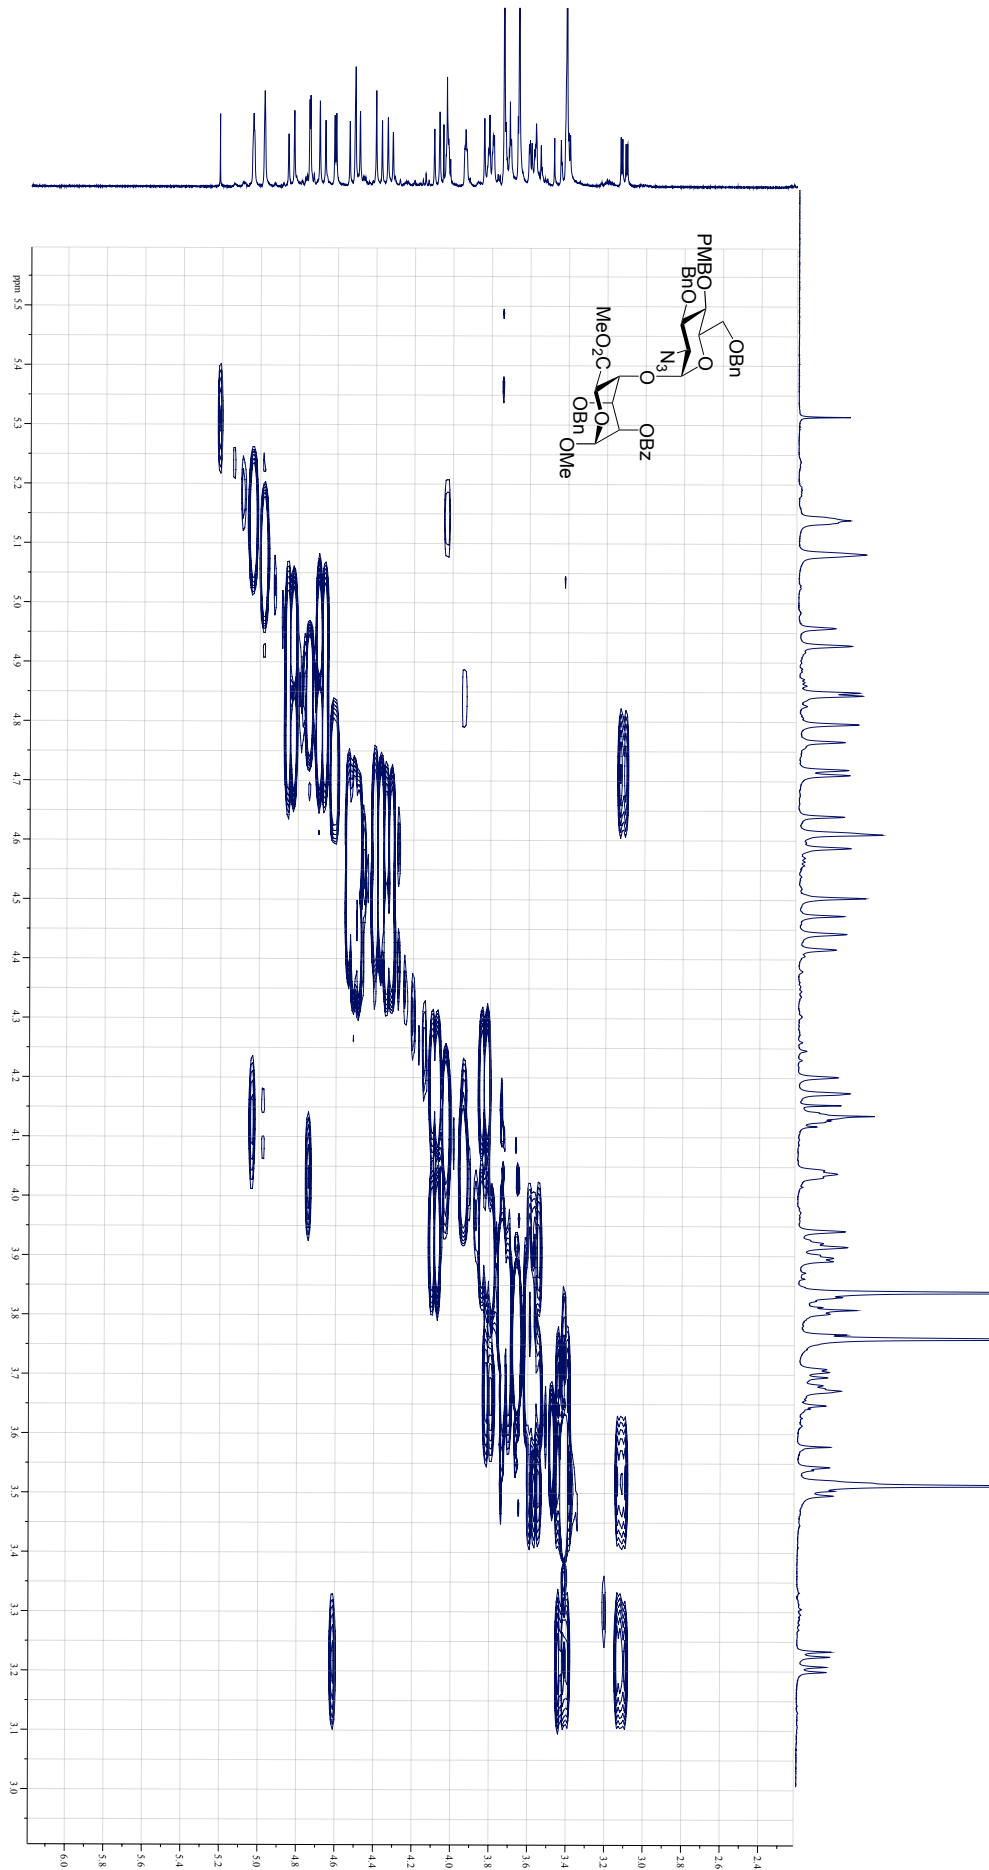

**Methyl 2-azido-3-*O*-benzyl-4,6-*O*-benzylidene-2-deoxy- $\alpha$ -D-glucopyranosyl-(1 $\rightarrow$ 4)-(methyl 2-*O*-benzoyl-3-*O*-benzyl- $\alpha$ -L-idopyranoside) uronate 8**

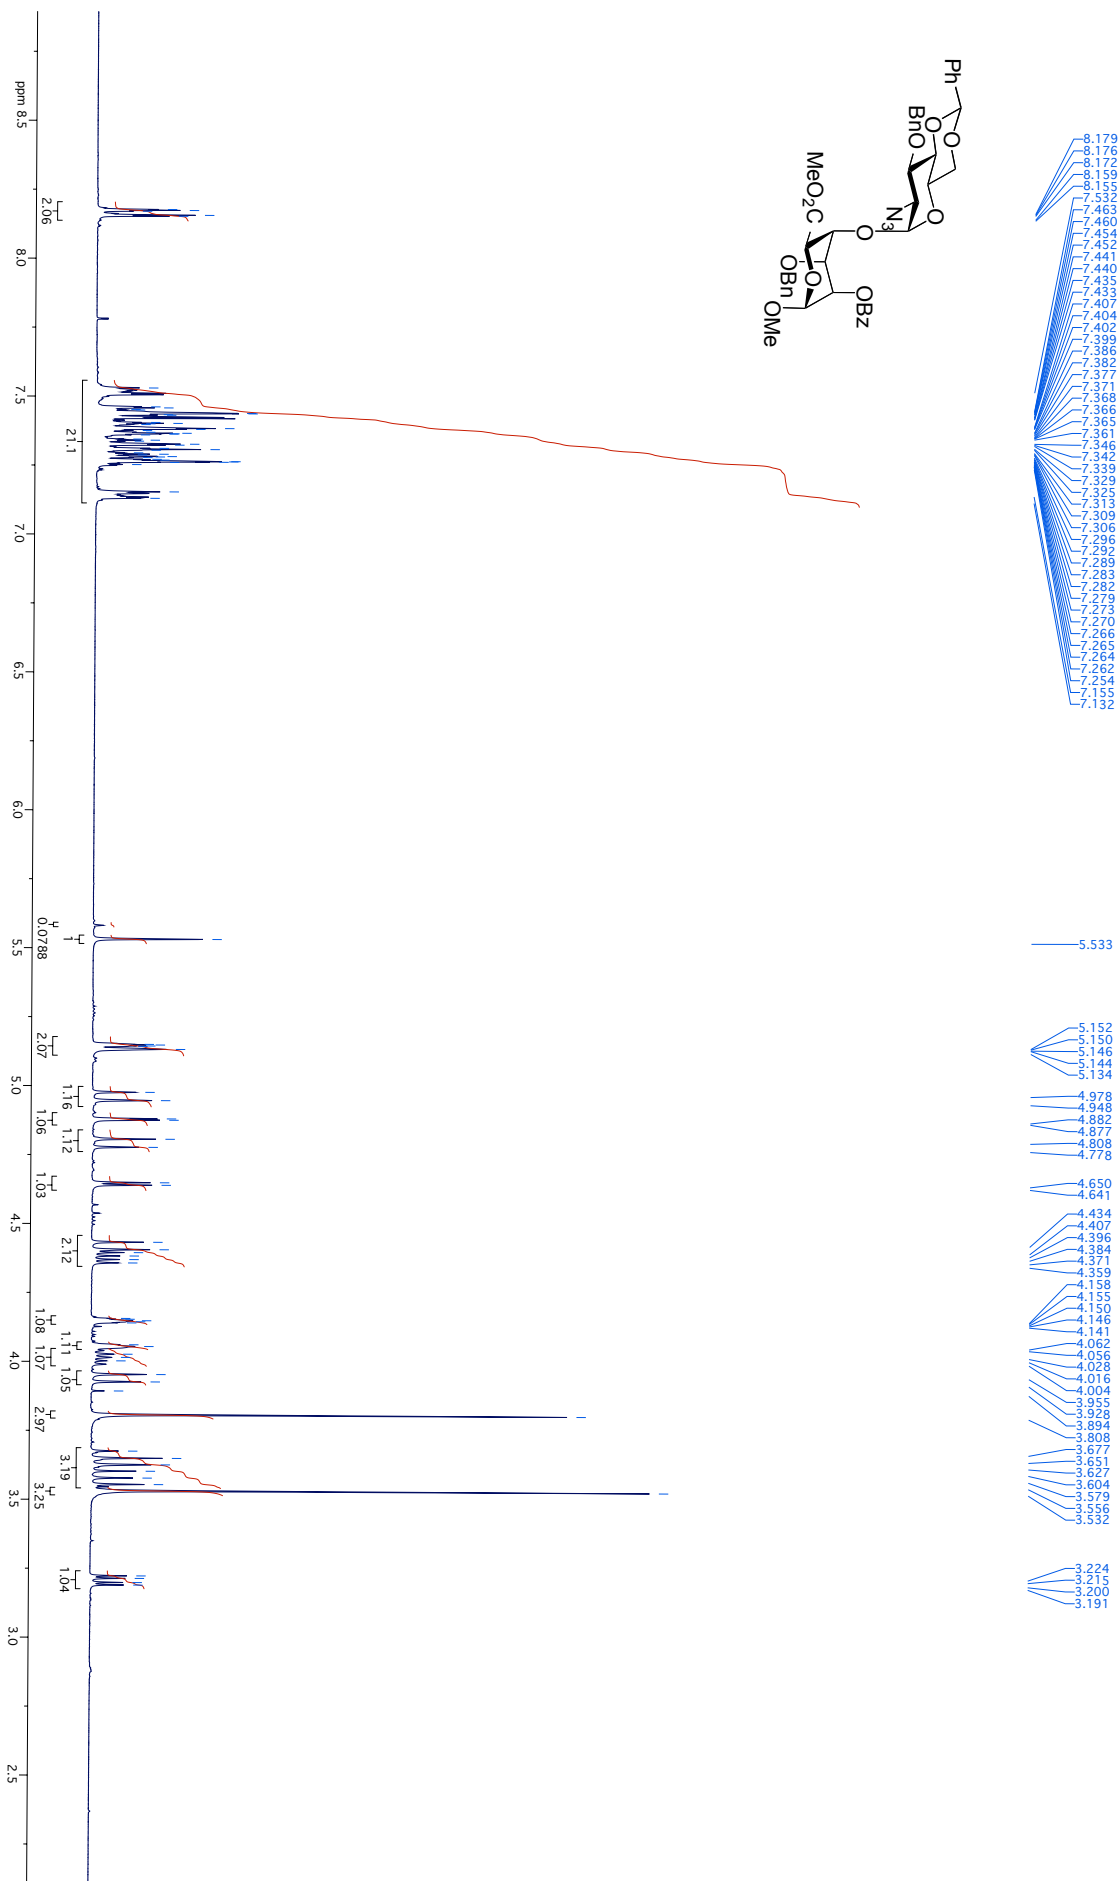



**Methyl 2-azido-3-*O*-benzyl-4,6-*O*-benzylidene-2-deoxy- $\alpha$ -D-glucopyranosyl-(1 $\rightarrow$ 4)-(methyl 2-*O*-benzoyl-3-*O*-benzyl- $\alpha$ -L-idopyranoside) uronate 8**

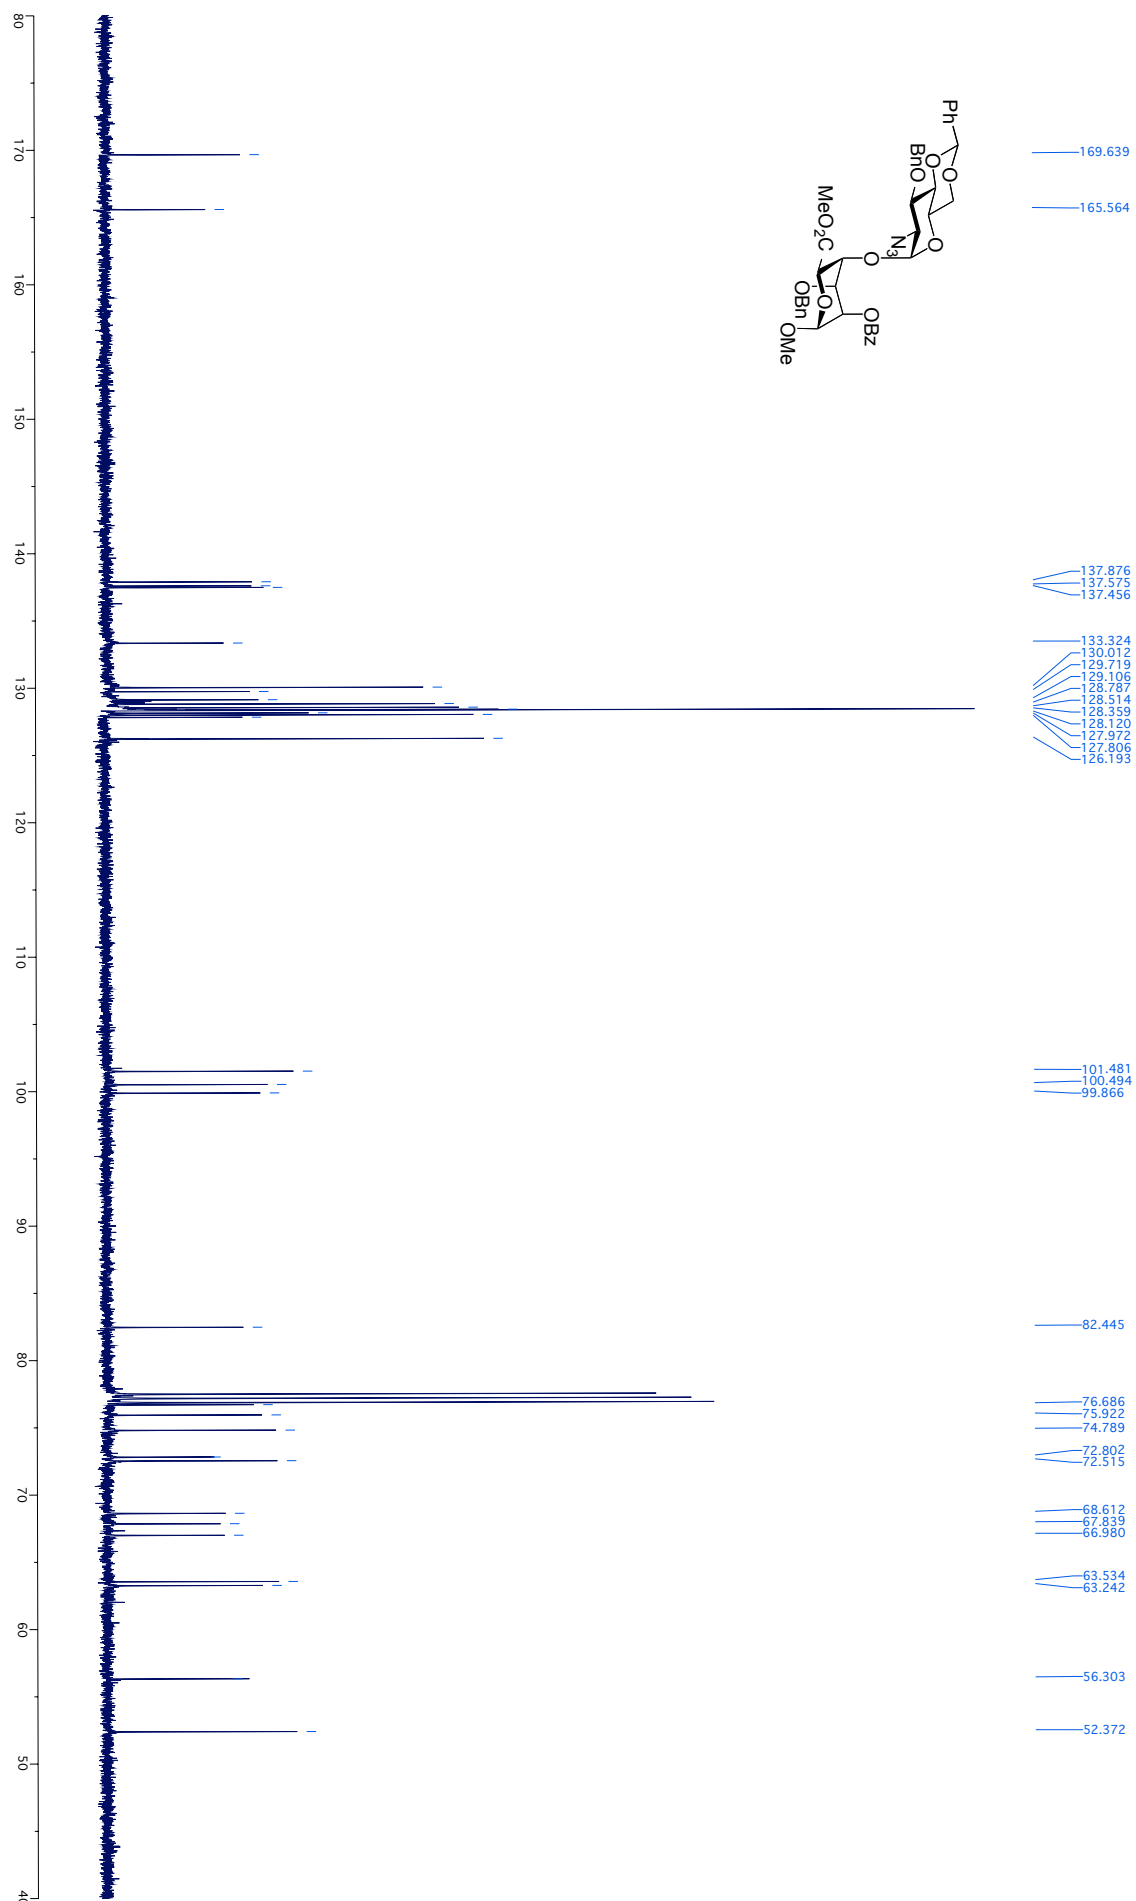

**Methyl 2-azido-3-*O*-benzyl-4,6-*O*-benzylidene-2-deoxy- $\alpha$ -D-glucopyranosyl-(1 $\rightarrow$ 4)-(methyl 2-*O*-benzoyl-3-*O*-benzyl- $\alpha$ -L-idopyranoside) uronate 8**

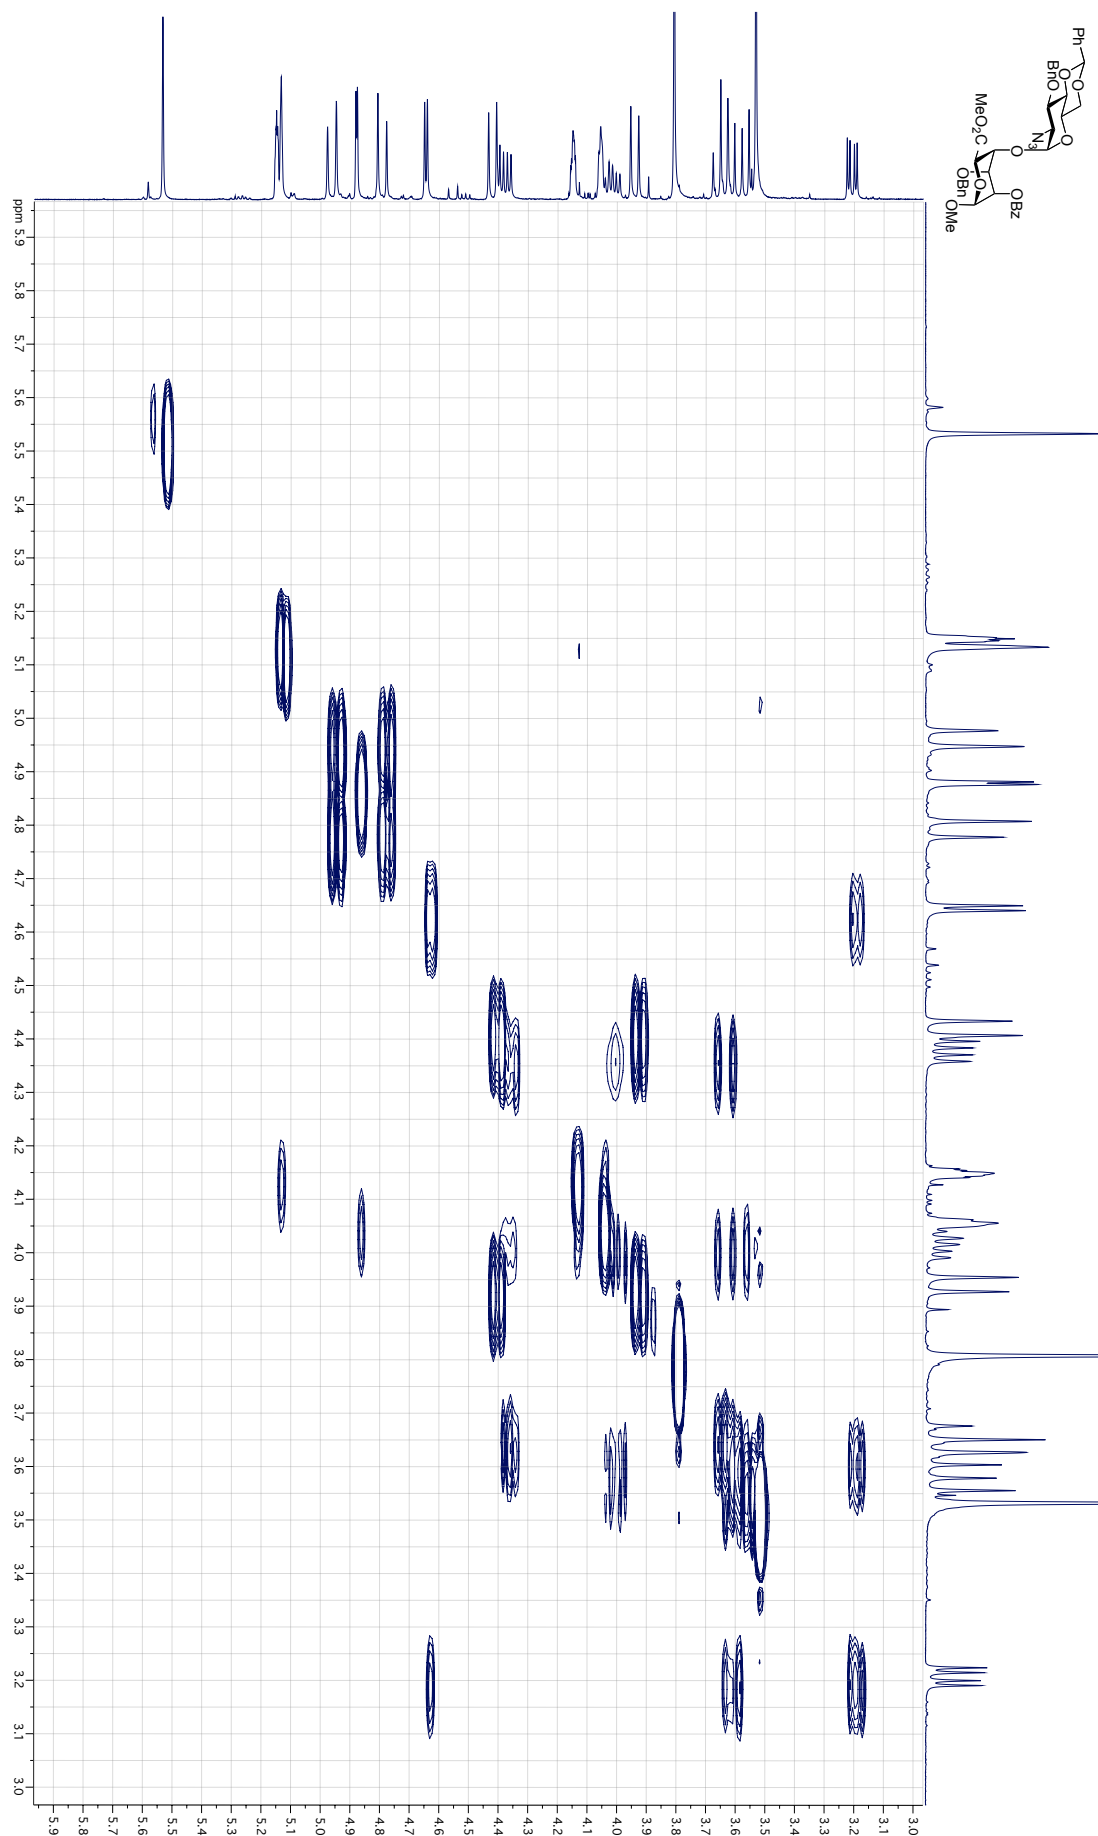

**2-Azido-3-*O*-benzyl-2-deoxy-4-*O*-*p*-methoxybenzyl- $\alpha$ -D-glucofuranosyl-(1 $\rightarrow$ 4)-(methyl 3-*O*-benzyl- $\alpha$ -L-idopyranoside) uronic acid 9**

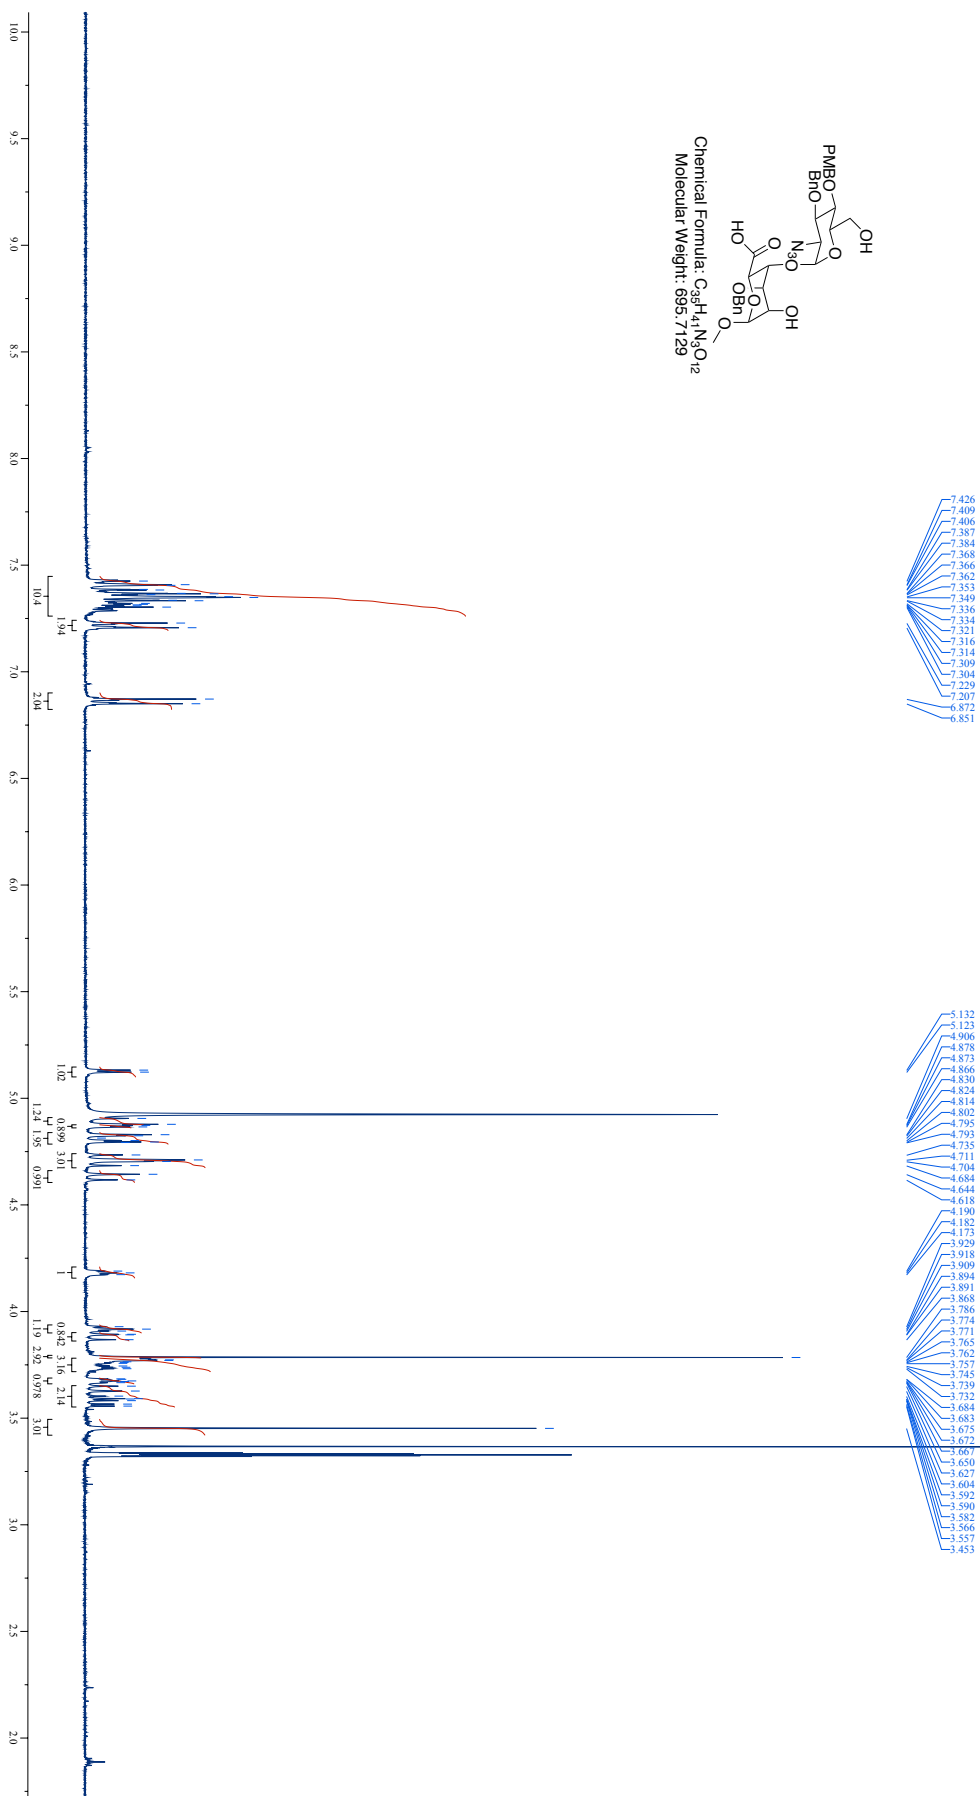

**2-Azido-3-O-benzyl-2-deoxy-4-O-p-methoxybenzyl- $\alpha$ -D-glucofuranosyl-(1 $\rightarrow$ 4)-(methyl 3-O-benzyl- $\alpha$ -L-idopyranoside) uronic acid 9**

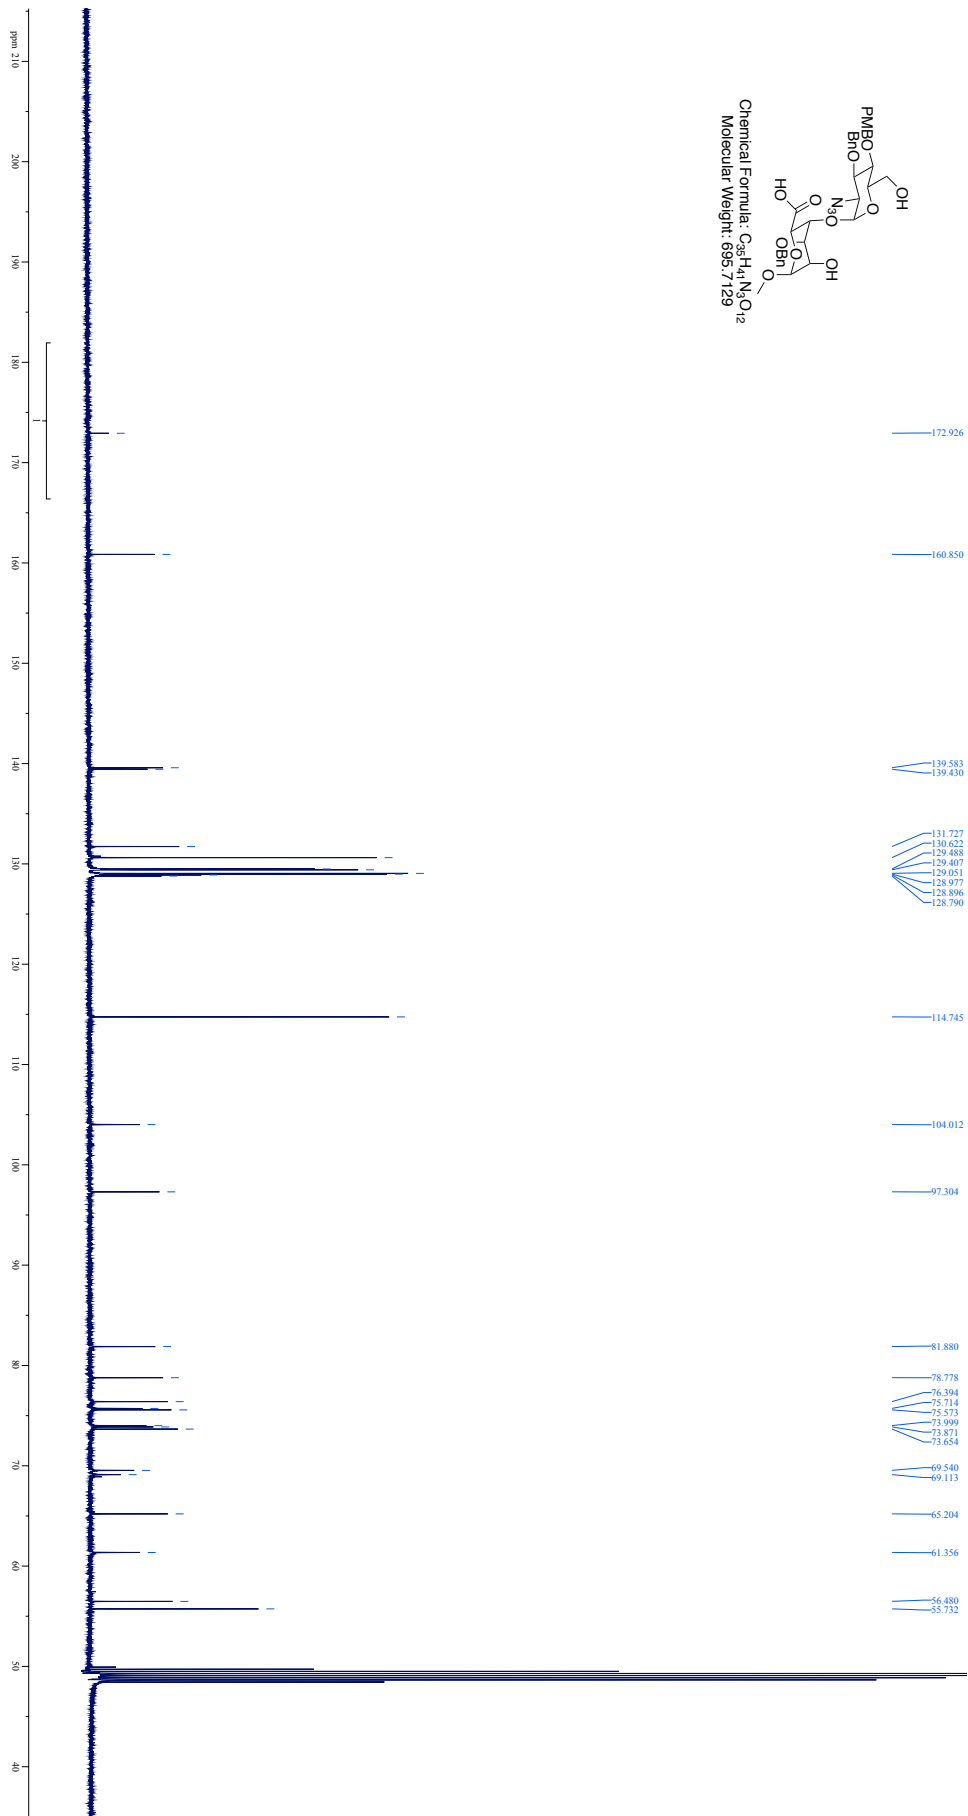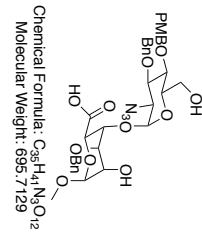

**2-Azido-3-O-benzyl-2-deoxy-4-O-p-methoxybenzyl- $\alpha$ -D-glucopyranosyl-(1 $\rightarrow$ 4)-(methyl 3-O-benzyl- $\alpha$ -L-idopyranoside) uronic acid 9**

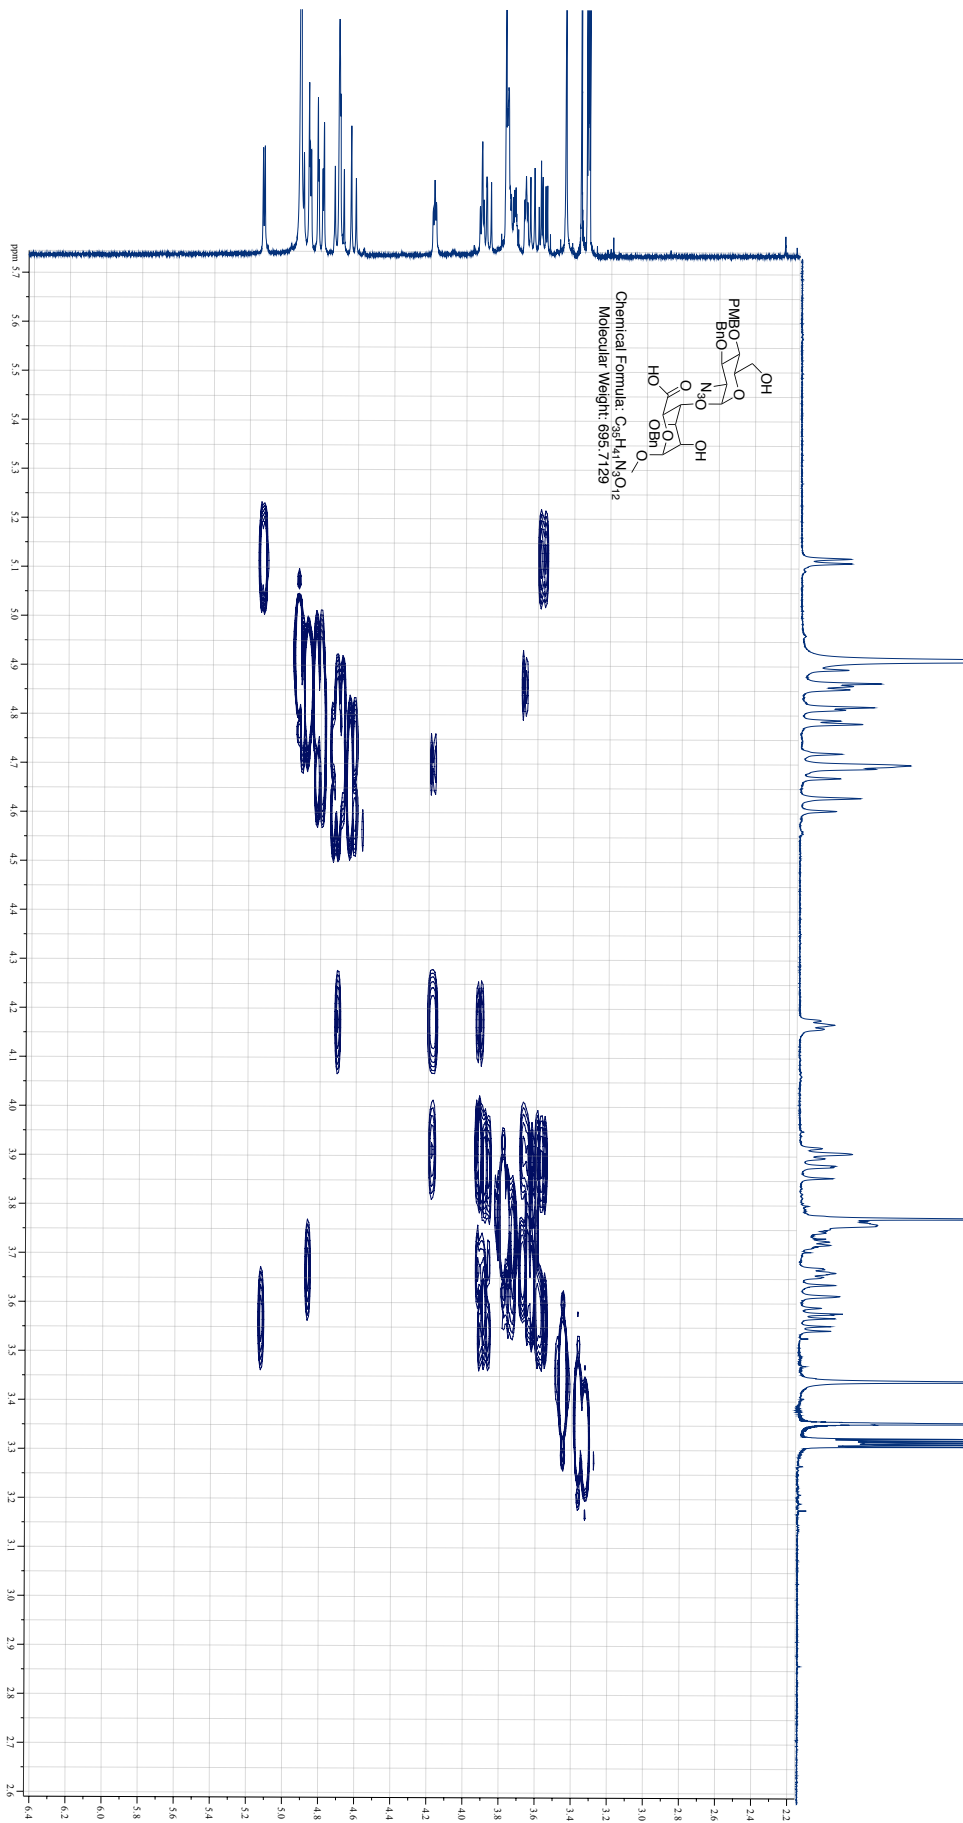

**2-azido-3,6-di-*O*-benzyl-2-deoxy-4-*O*-*p*-methoxybenzyl- $\alpha$ -D-glucopyranosyl-(1 $\rightarrow$ 4)-(methyl 3-*O*-benzyl- $\alpha$ -L-idopyranoside) uronic acid 10**

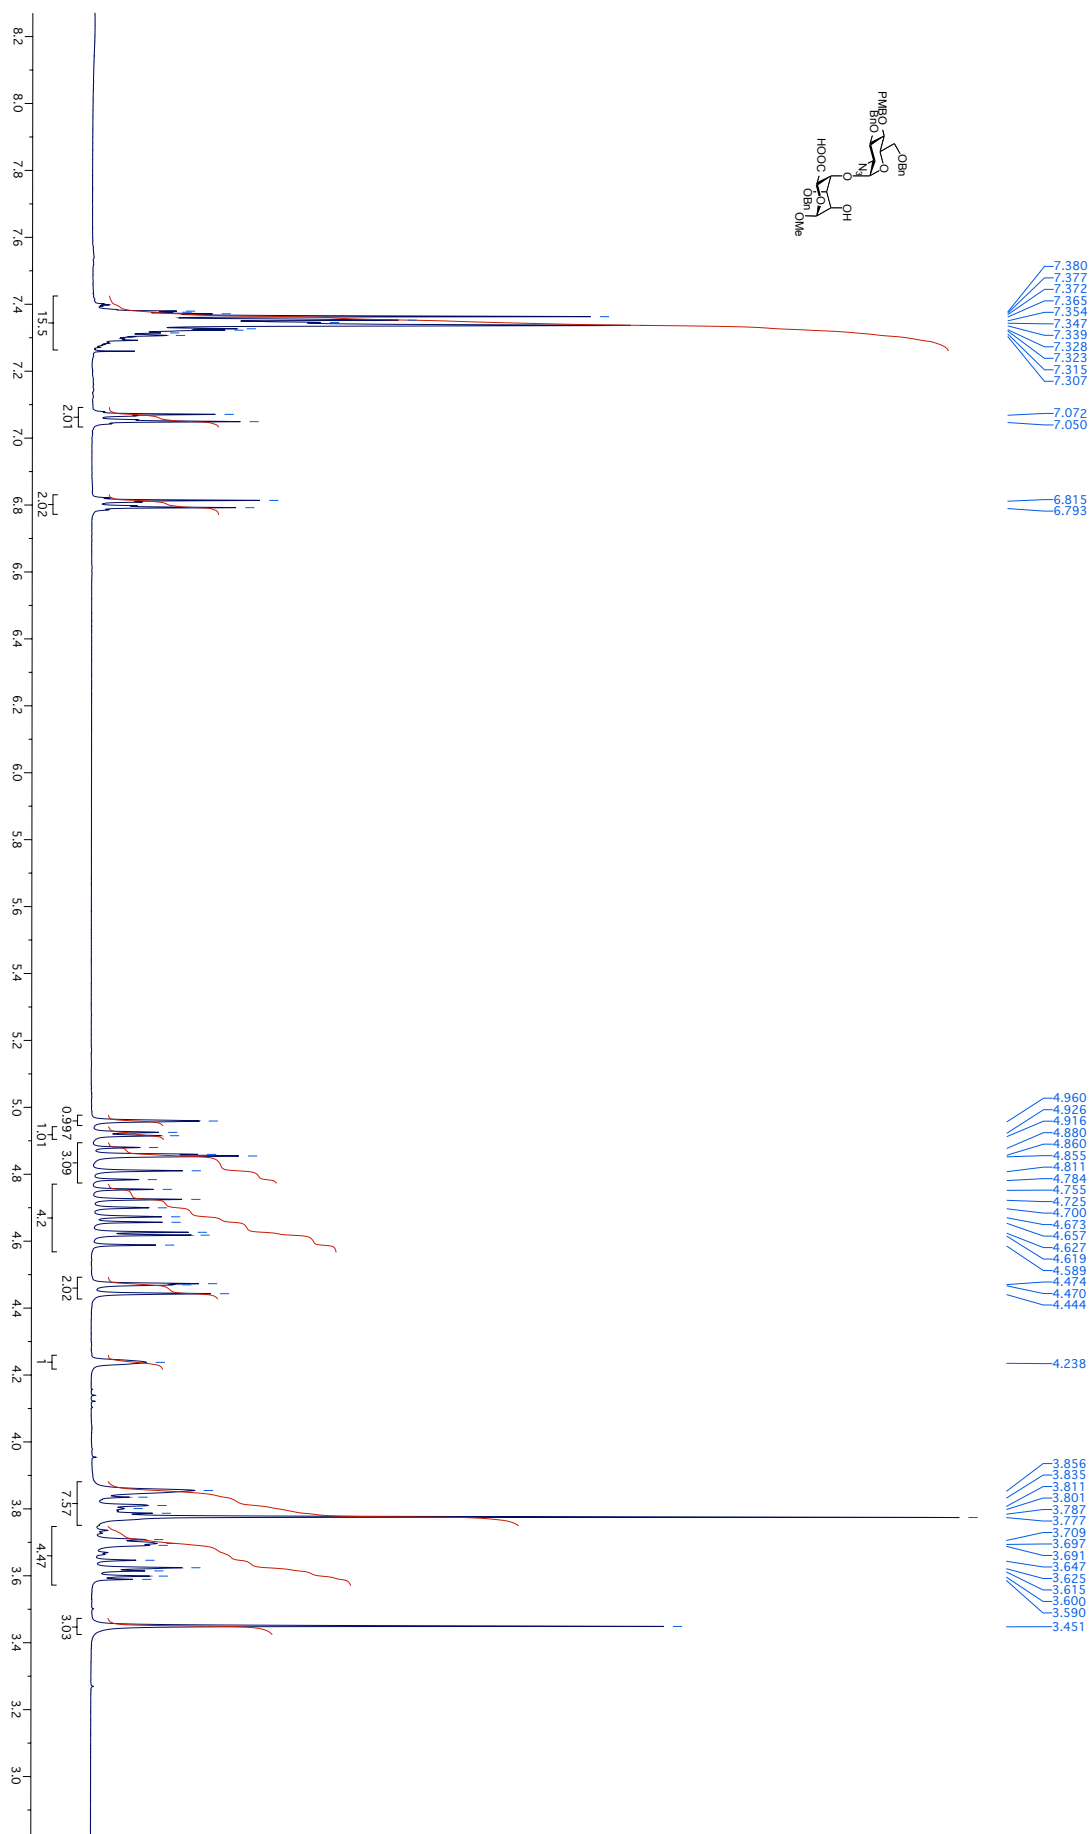

**2-azido-3,6-di-*O*-benzyl-2-deoxy-4-*O*-*p*-methoxybenzyl- $\alpha$ -D-glucopyranosyl-(1 $\rightarrow$ 4)-(methyl 3-*O*-benzyl- $\alpha$ -L-idopyranoside) uronic acid 10**

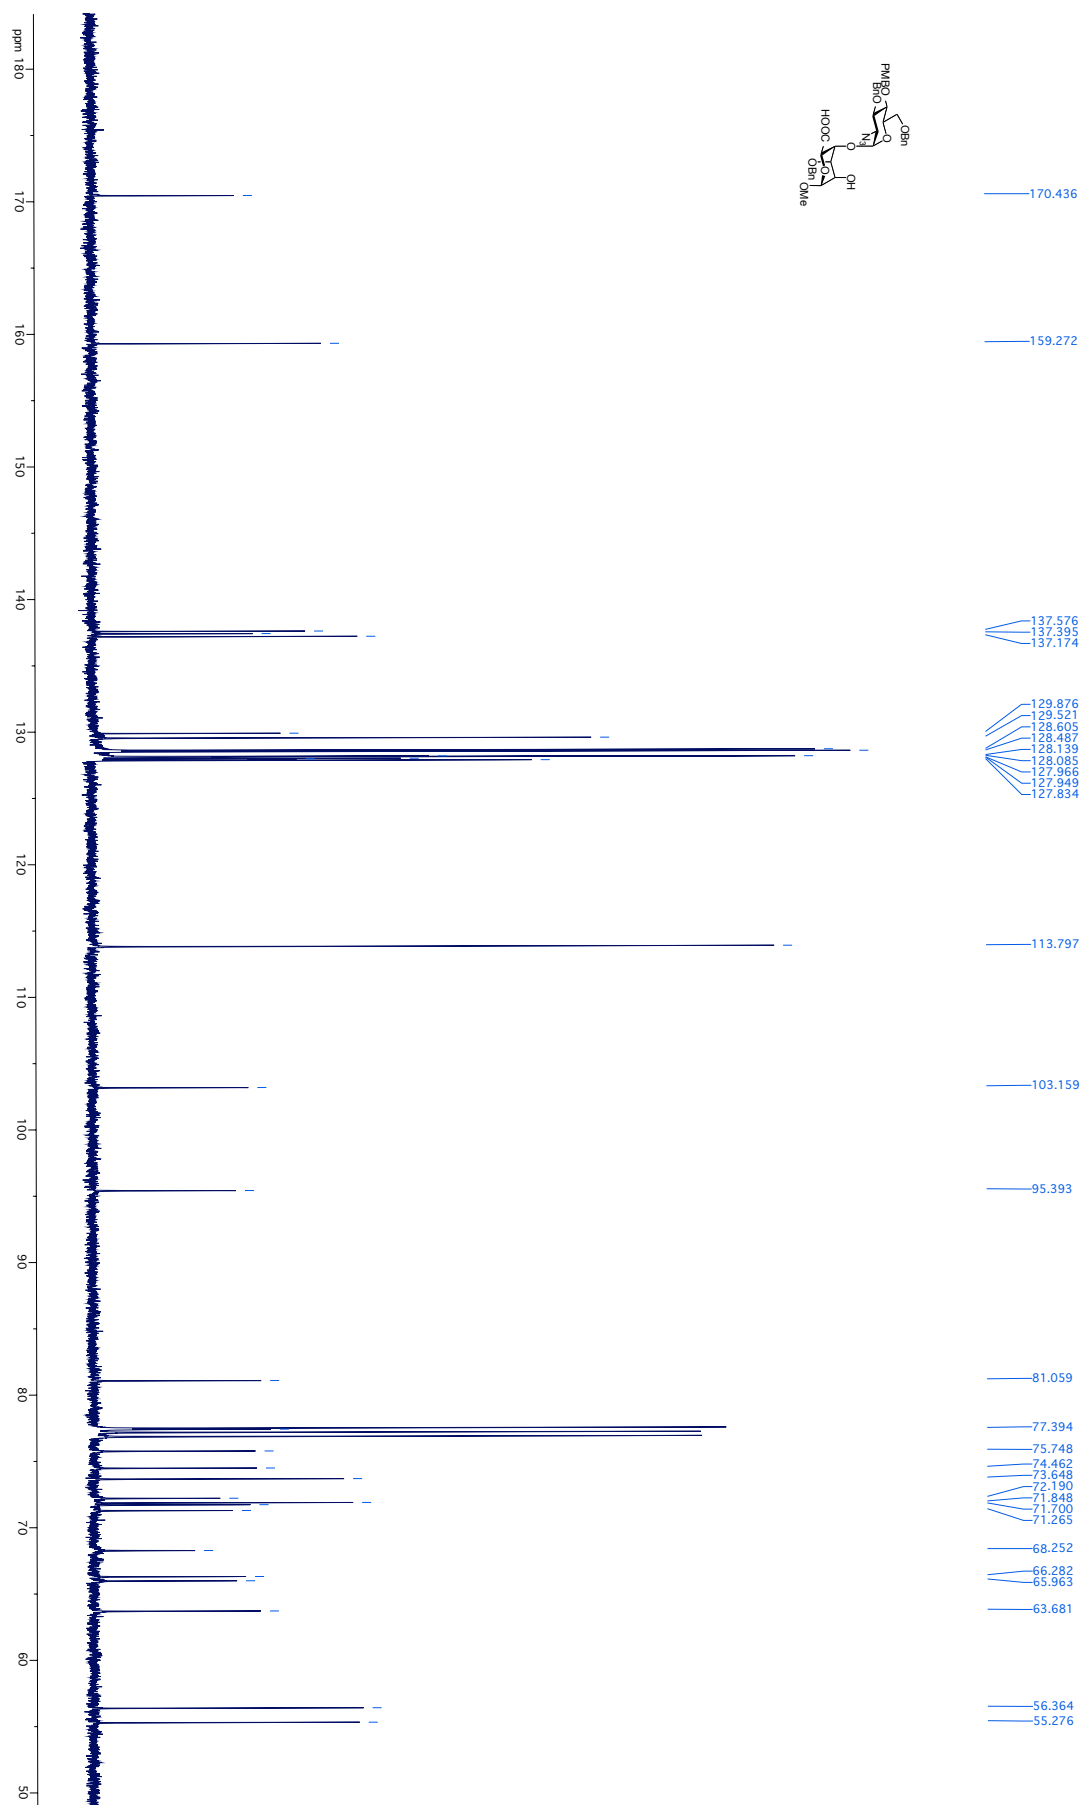

**2-azido-3,6-di-*O*-benzyl-2-deoxy-4-*O*-*p*-methoxybenzyl- $\alpha$ -D-glucopyranosyl-(1 $\rightarrow$ 4)-(methyl 3-*O*-benzyl- $\alpha$ -L-idopyranoside) uronic acid 10**

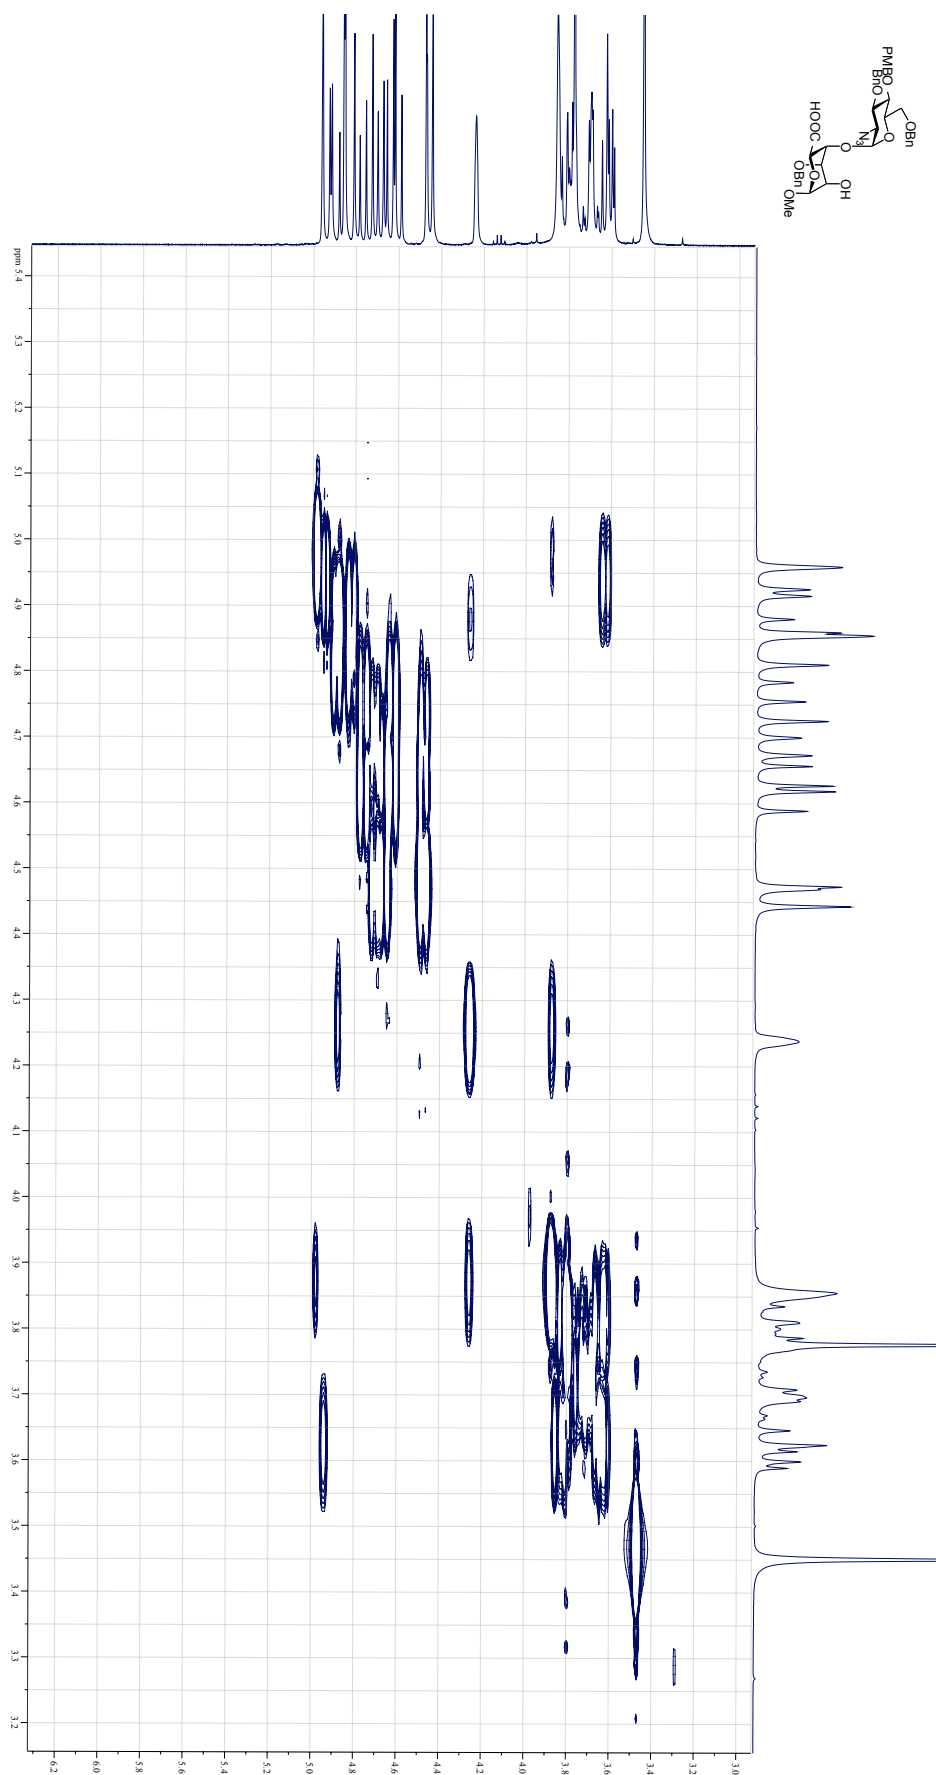



**2-azido-3-O-benzyl-4,6-O-benzylidene-2-deoxy- $\alpha$ -D-glucopyranosyl-(1 $\rightarrow$ 4)-(methyl 3-O-benzyl- $\beta$ -L-idopyranoside) uronic acid 11**

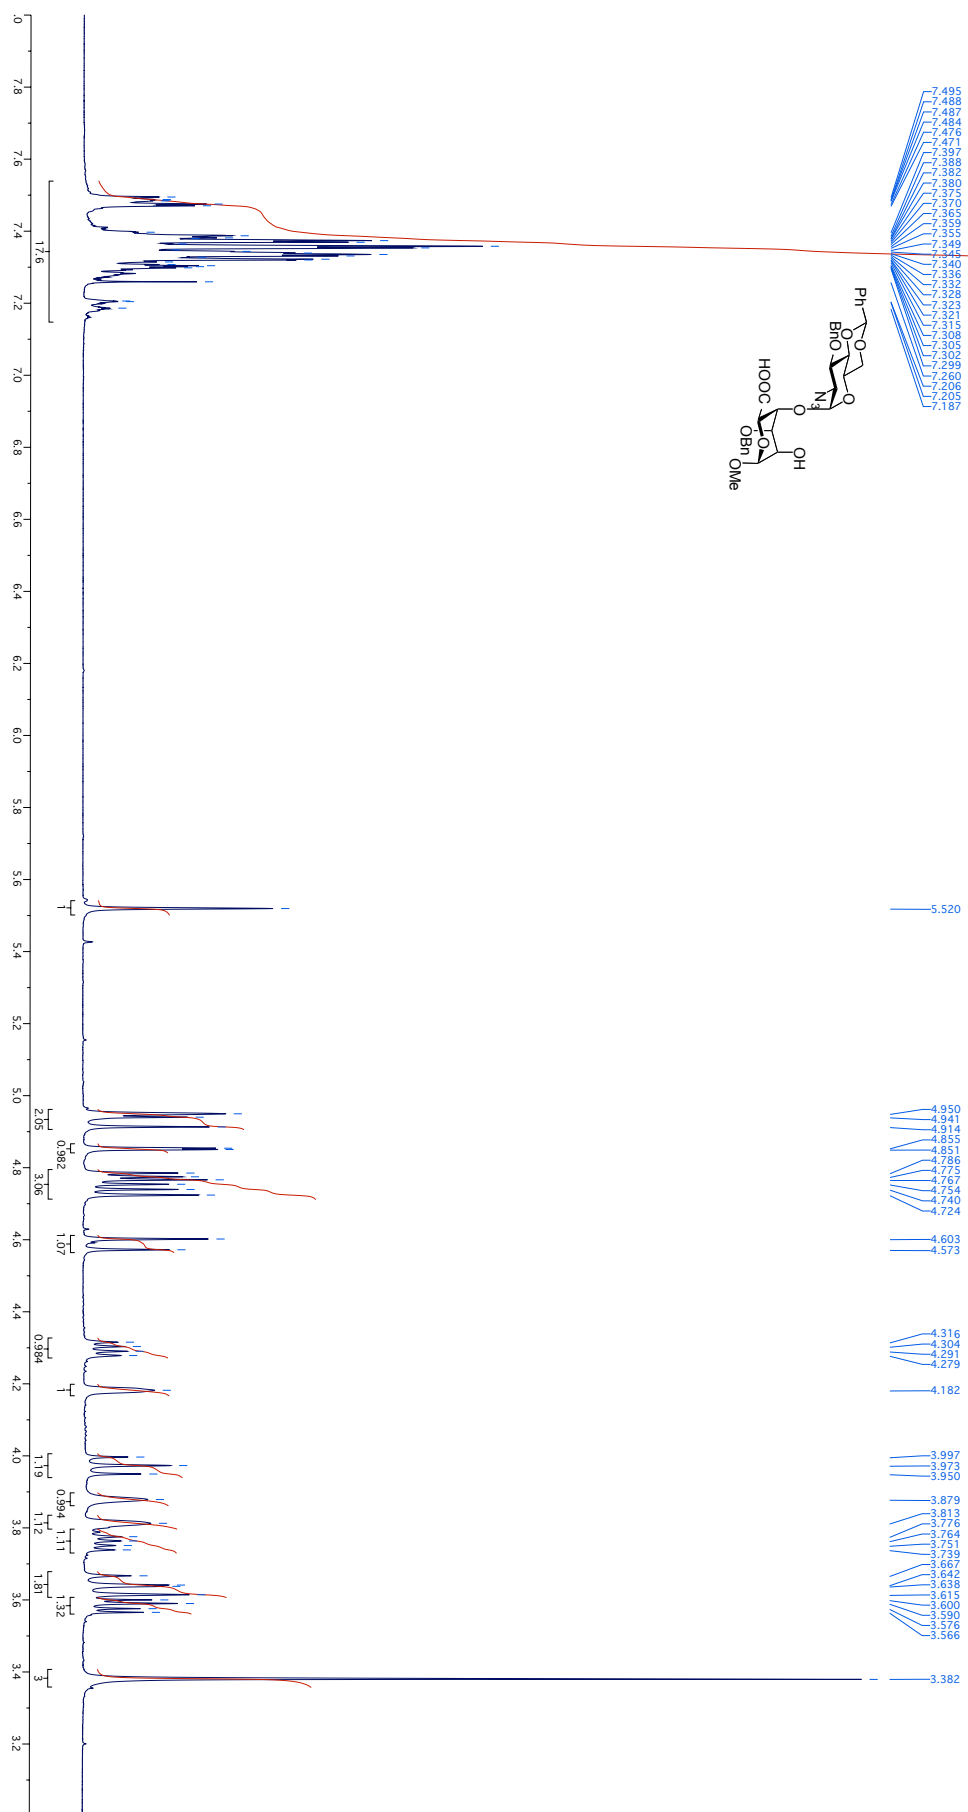

**2-azido-3-O-benzyl-4,6-O-benzylidene-2-deoxy- $\alpha$ -D-glucopyranosyl-(1 $\rightarrow$ 4)-(methyl 3-O-benzyl- $\beta$ -L-idopyranoside) uronic acid 11**

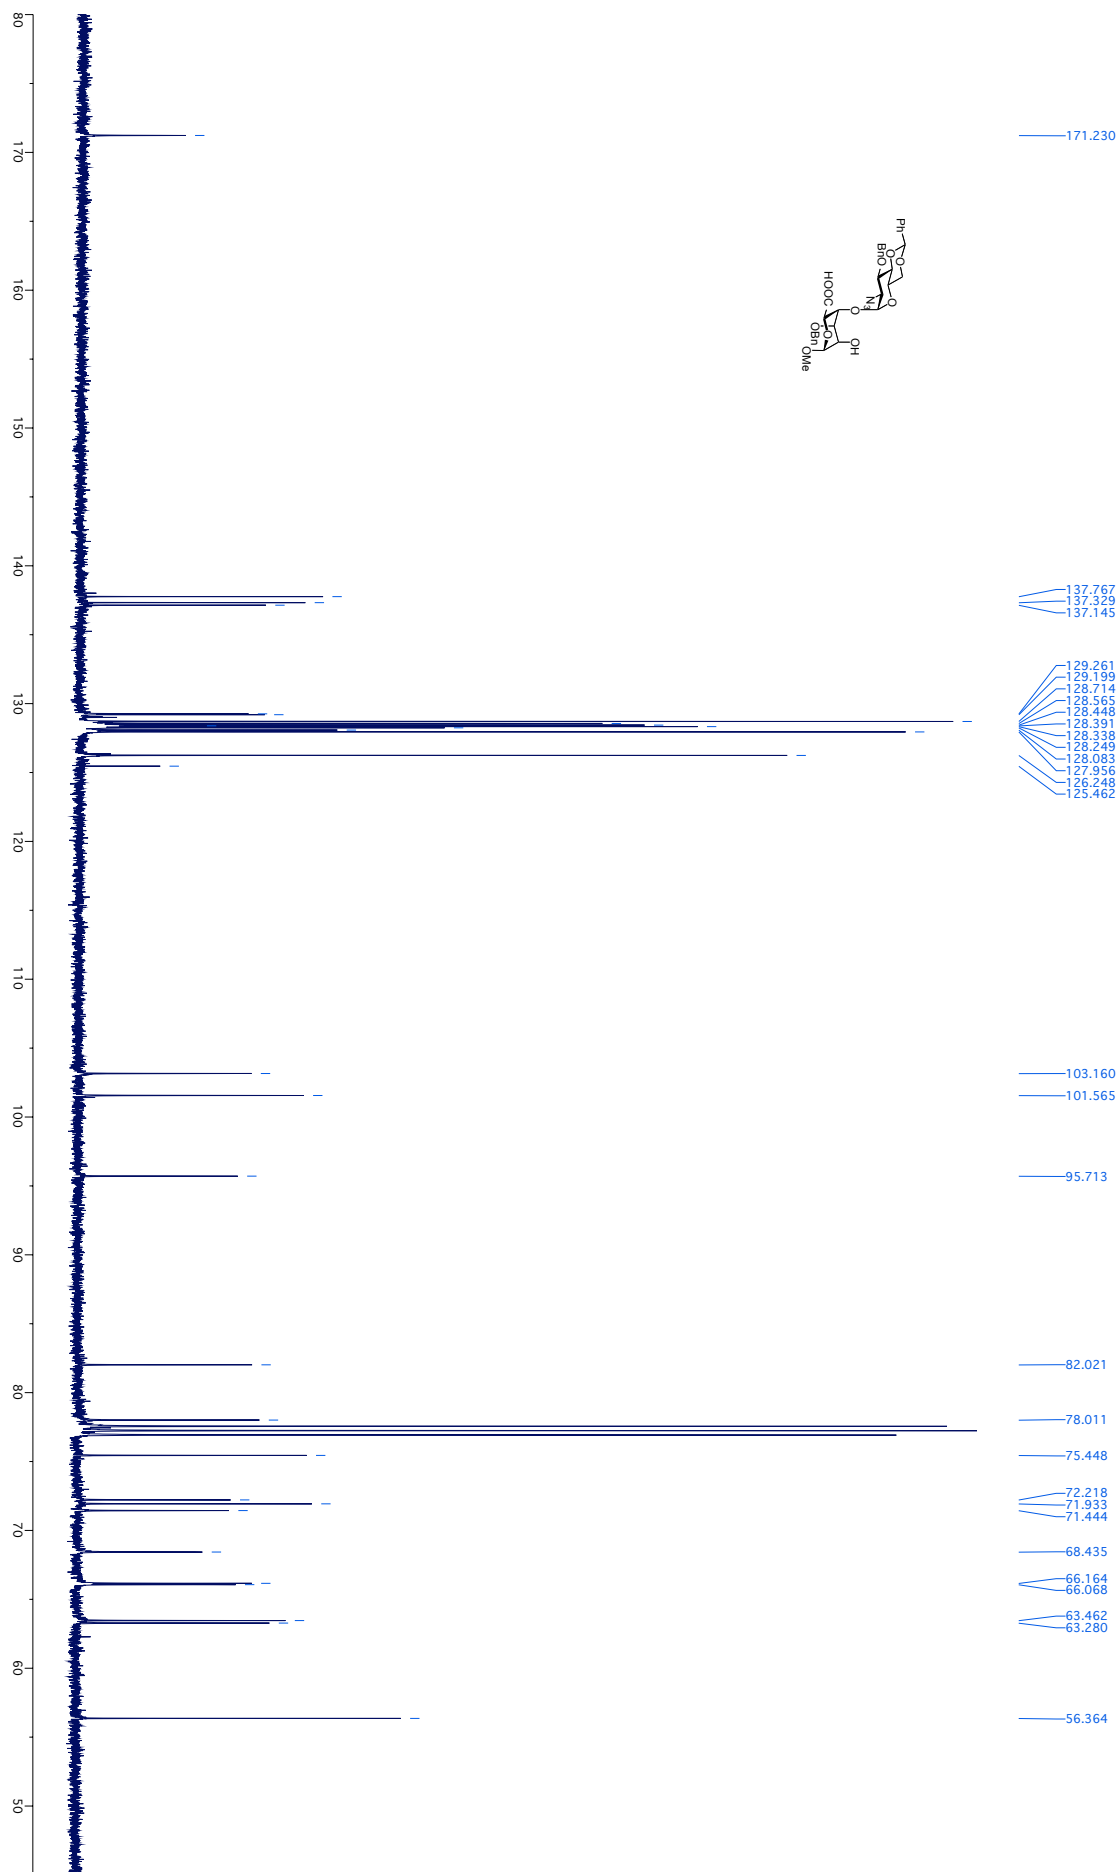

**2-azido-3-*O*-benzyl-4,6-*O*-benzylidene-2-deoxy- $\alpha$ -D-glucopyranosyl-(1 $\rightarrow$ 4)-(methyl 3-*O*-benzyl- $\beta$ -L-idopyranoside) uronic acid 11**

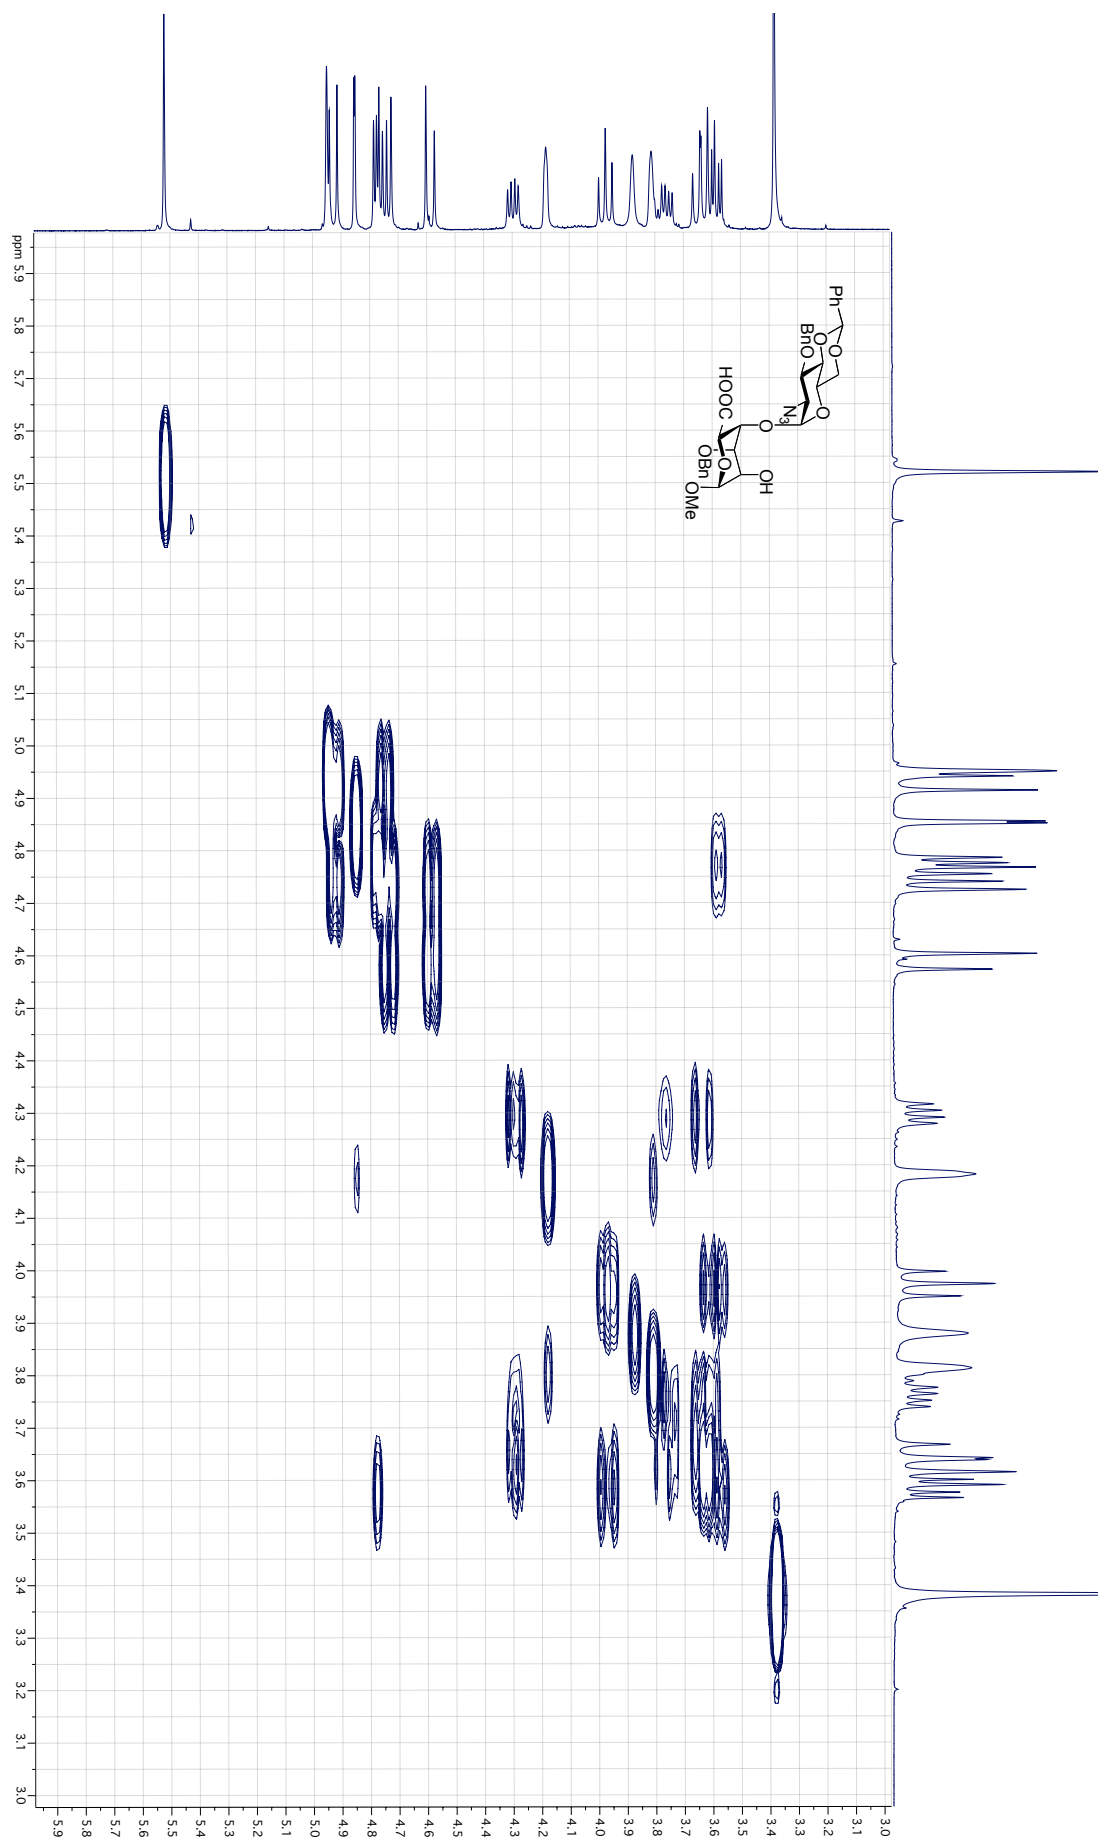

**2-Azido-3-O-benzyl-2-deoxy-4-O-p-methoxybenzyl-6-O-sulfonato- $\alpha$ -D-glucopyranosyl-(1 $\rightarrow$ 4)-(methyl 3-O-benzyl-2-O-sulfonato- $\alpha$ -L-idopyranoside) uronic acid di sodium salt 12**

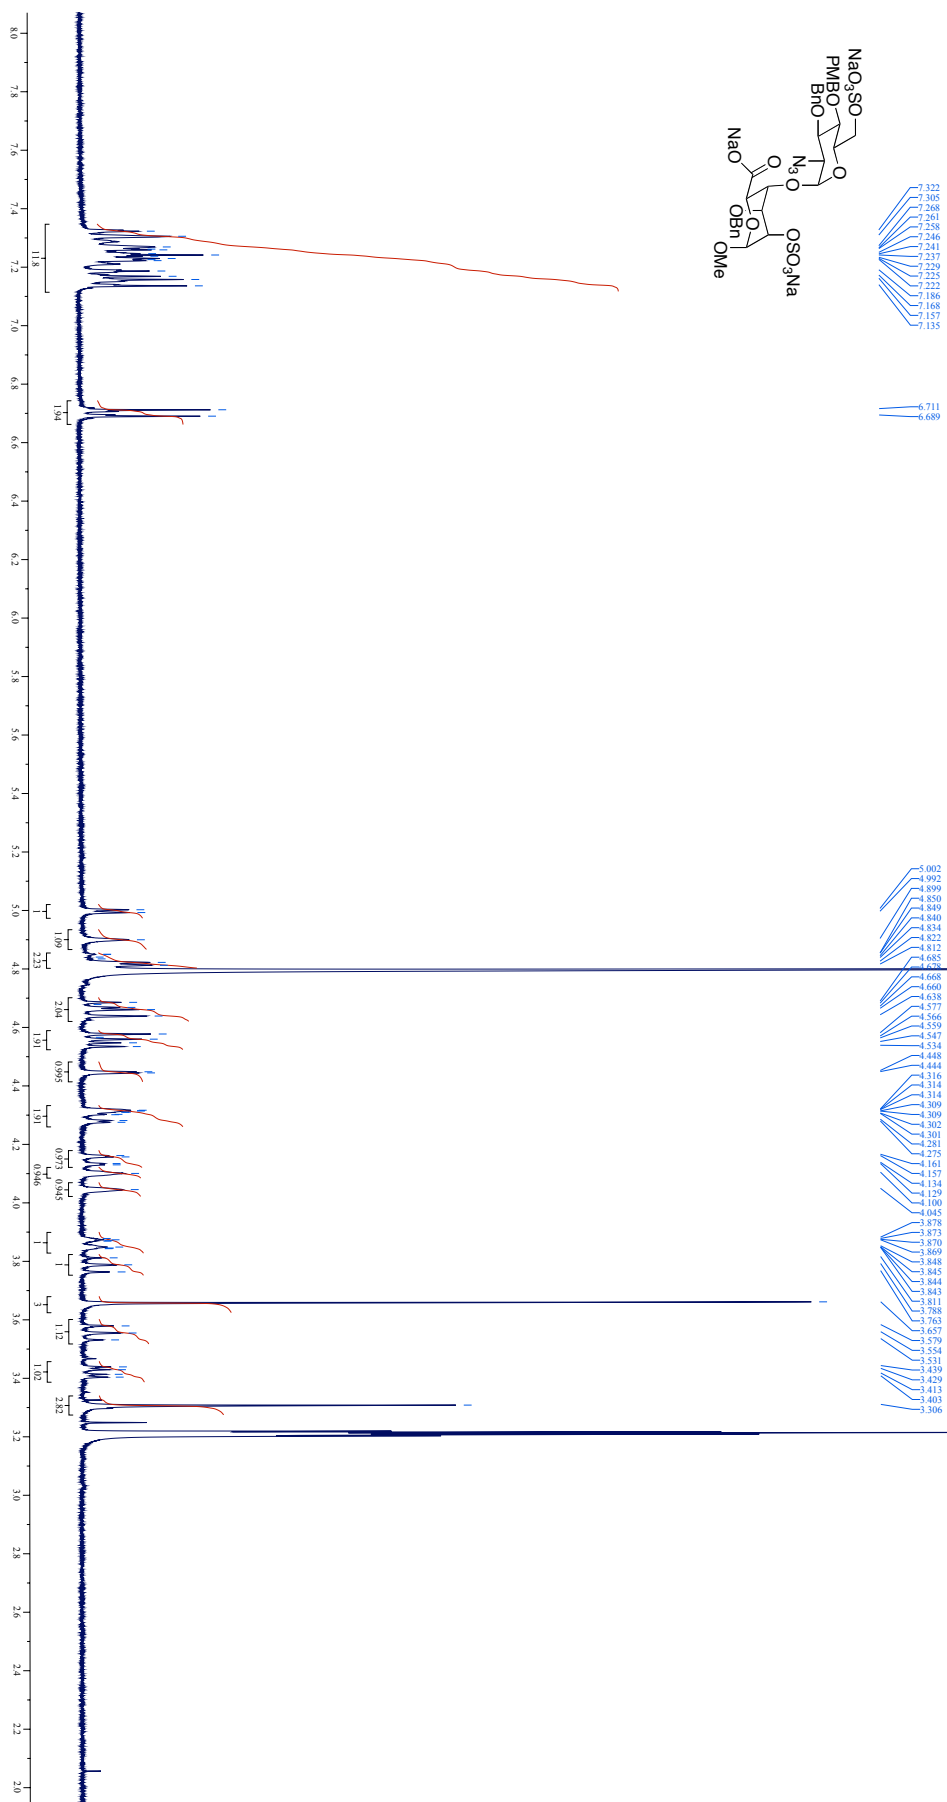

**2-Azido-3-O-benzyl-2-deoxy-4-O-p-methoxybenzyl-6-O-sulfonato- $\alpha$ -D-glucopyranosyl-(1 $\rightarrow$ 4)-  
(methyl 3-O-benzyl-2-O-sulfonato- $\alpha$ -L-idopyranoside) uronic acid di sodium salt 12**

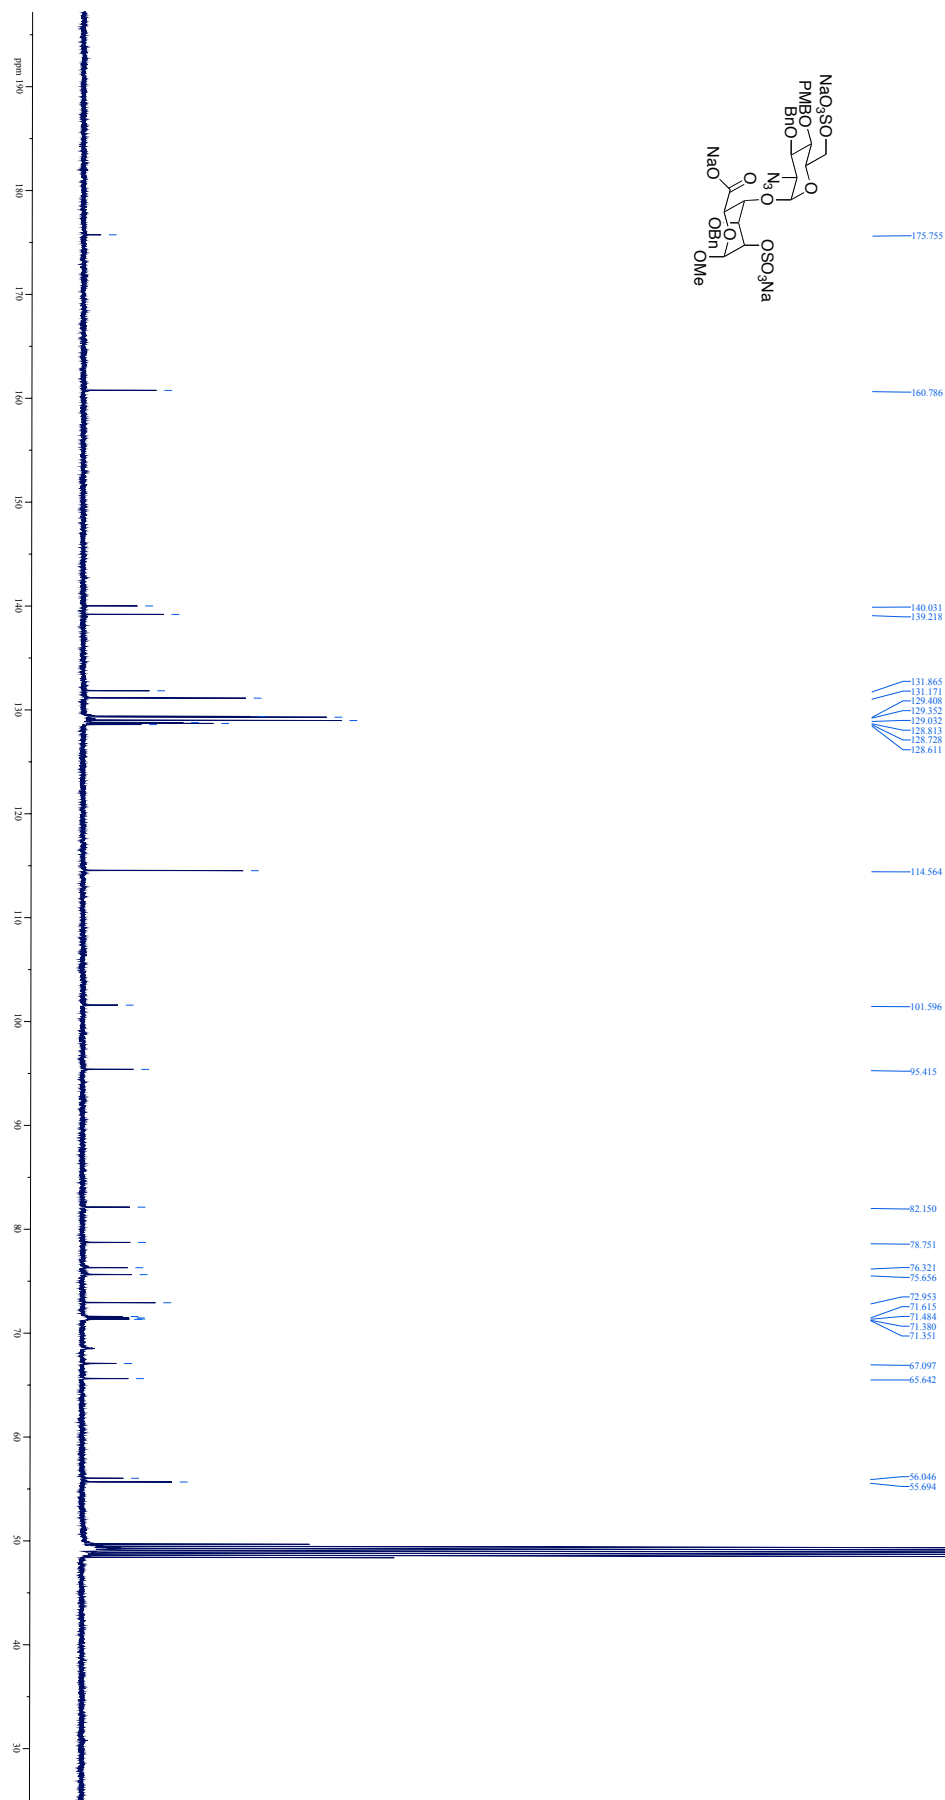

**2-Azido-3-O-benzyl-2-deoxy-4-O-p-methoxybenzyl-6-O-sulfonato- $\alpha$ -D-glucopyranosyl-(1 $\rightarrow$ 4)-  
(methyl 3-O-benzyl-2-O-sulfonato- $\alpha$ -L-idopyranoside) uronic acid di sodium salt 12**

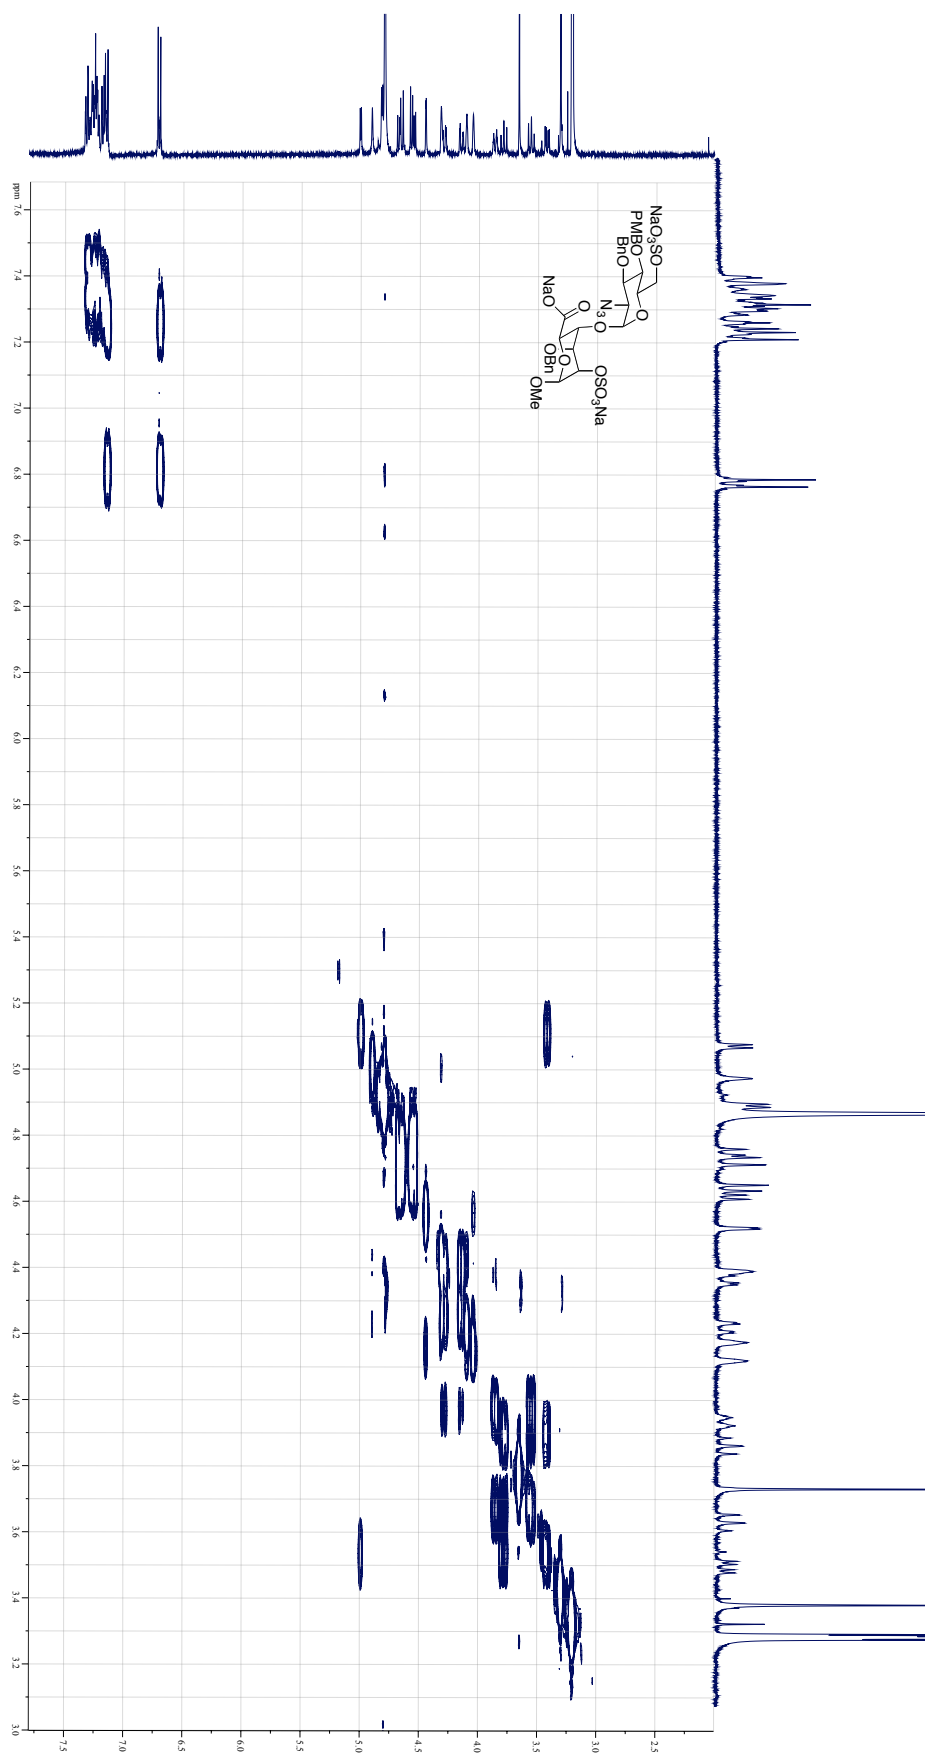

**2-azido-3,6-di-O-benzyl-2-deoxy-4-O-p-methoxybenzyl- $\alpha$ -D-glucopyranosyl-(1 $\rightarrow$ 4)-(methyl 2-O-sulfonato-3-O-benzyl- $\alpha$ -L-idopyranoside) uronic acid mono sodium salt 13**

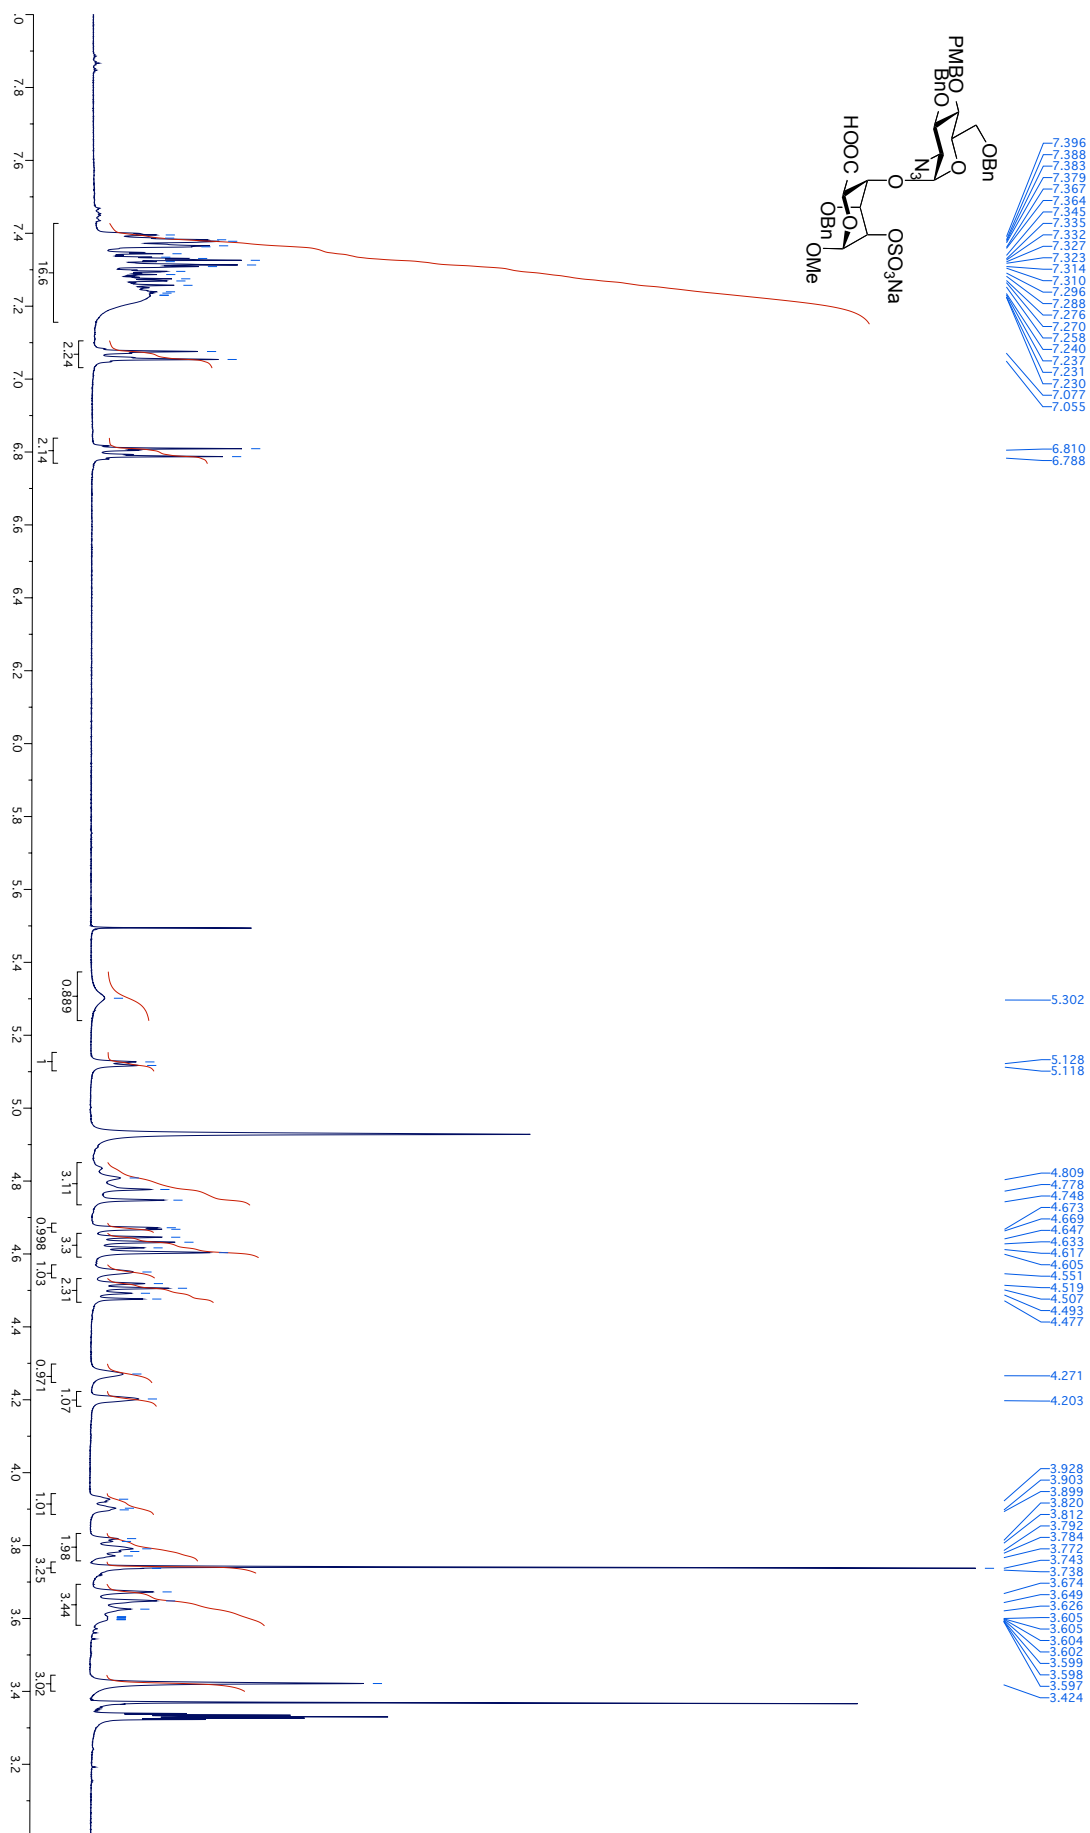

**2-azido-3,6-di-*O*-benzyl-2-deoxy-4-*O*-*p*-methoxybenzyl- $\alpha$ -D-glucopyranosyl-(1 $\rightarrow$ 4)-(methyl 2-*O*-sulfonato-3-*O*-benzyl- $\alpha$ -L-idopyranoside) uronic acid mono sodium salt 13**

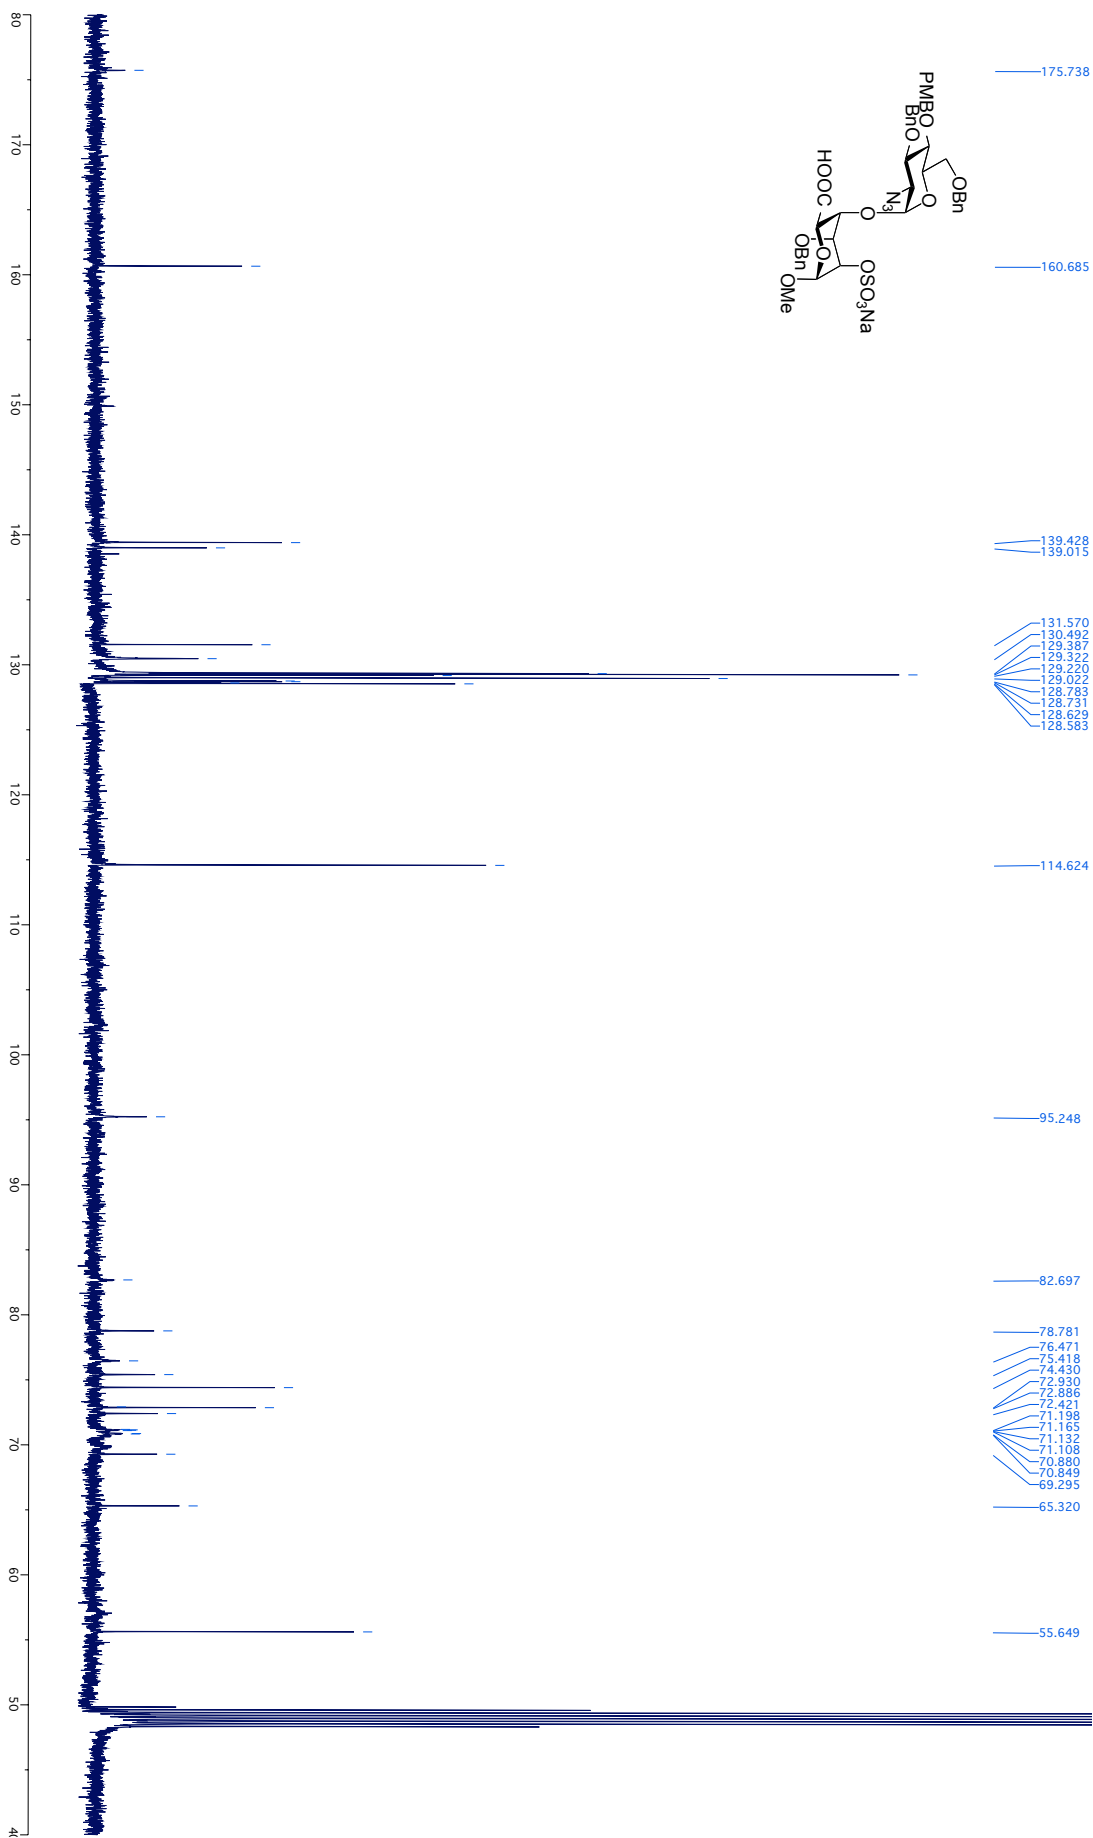



**2-azido-3,6-di-O-benzyl-2-deoxy-4-O-p-methoxybenzyl- $\alpha$ -D-glucopyranosyl-(1 $\rightarrow$ 4)-(methyl 2-O-sulfonato-3-O-benzyl- $\alpha$ -L-idopyranoside) uronic acid mono sodium salt 13**

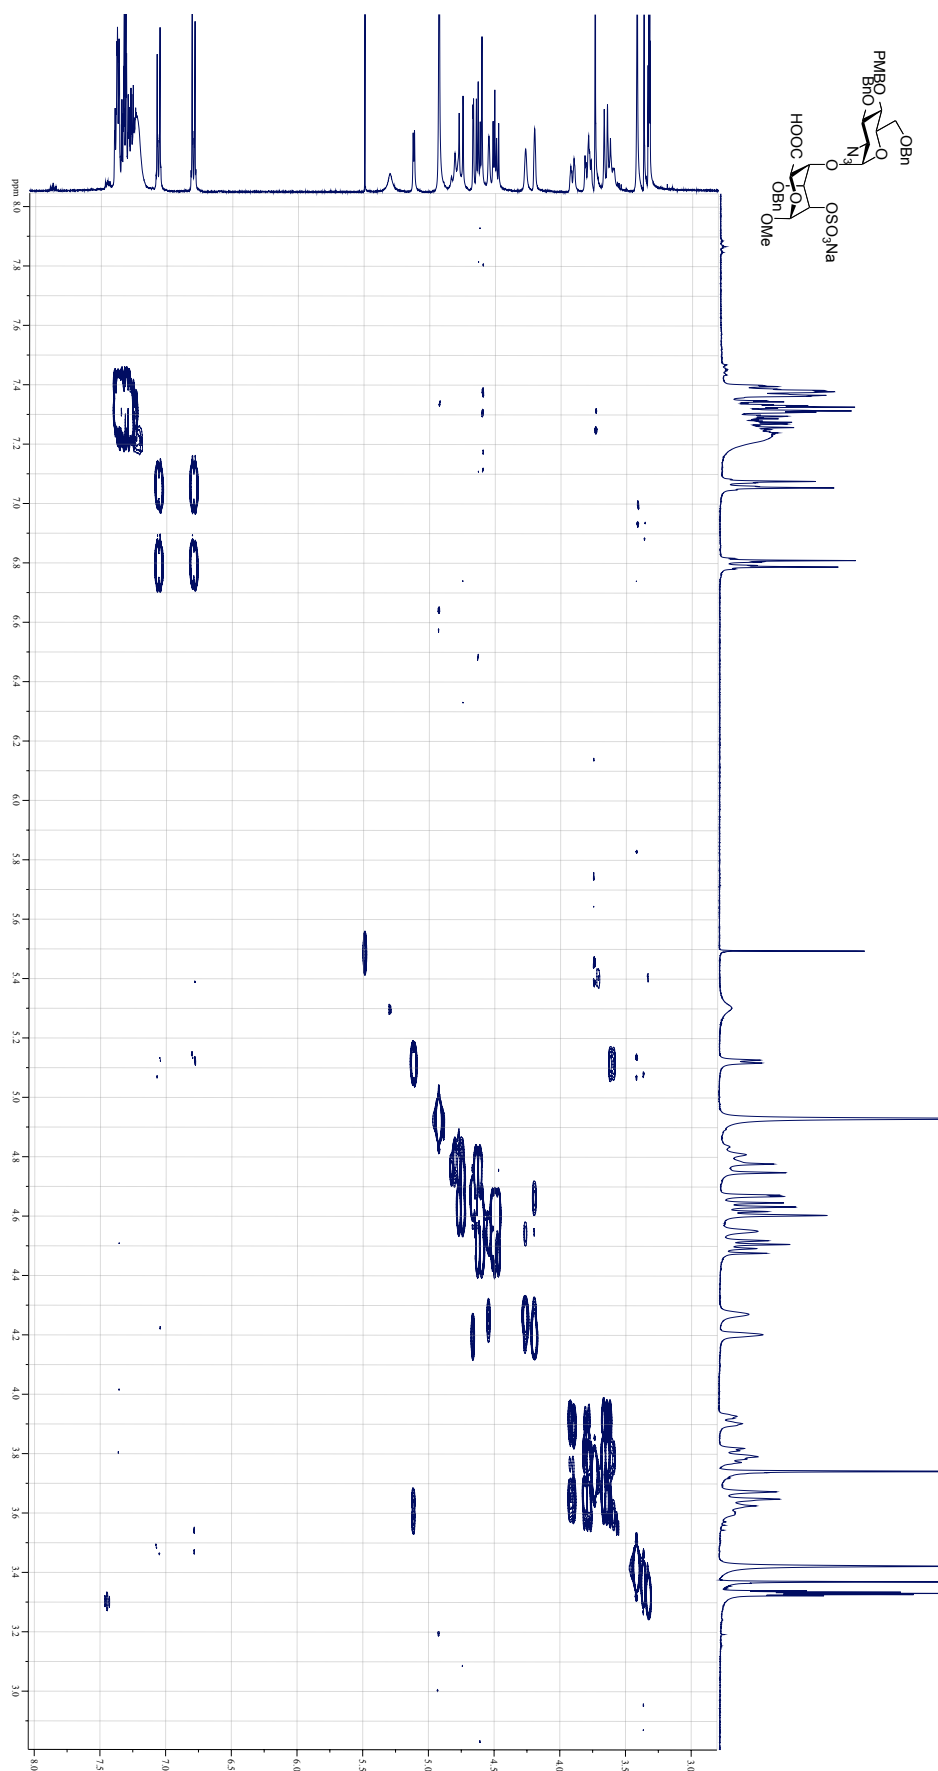

**Methyl-6-O-sulfonato- $\alpha$ -D-glucosaminopyranosyl-(1 $\rightarrow$ 4)-2-O-sulfonato- $\alpha$ -L-idopyranoside uronate tri sodium salt 14**

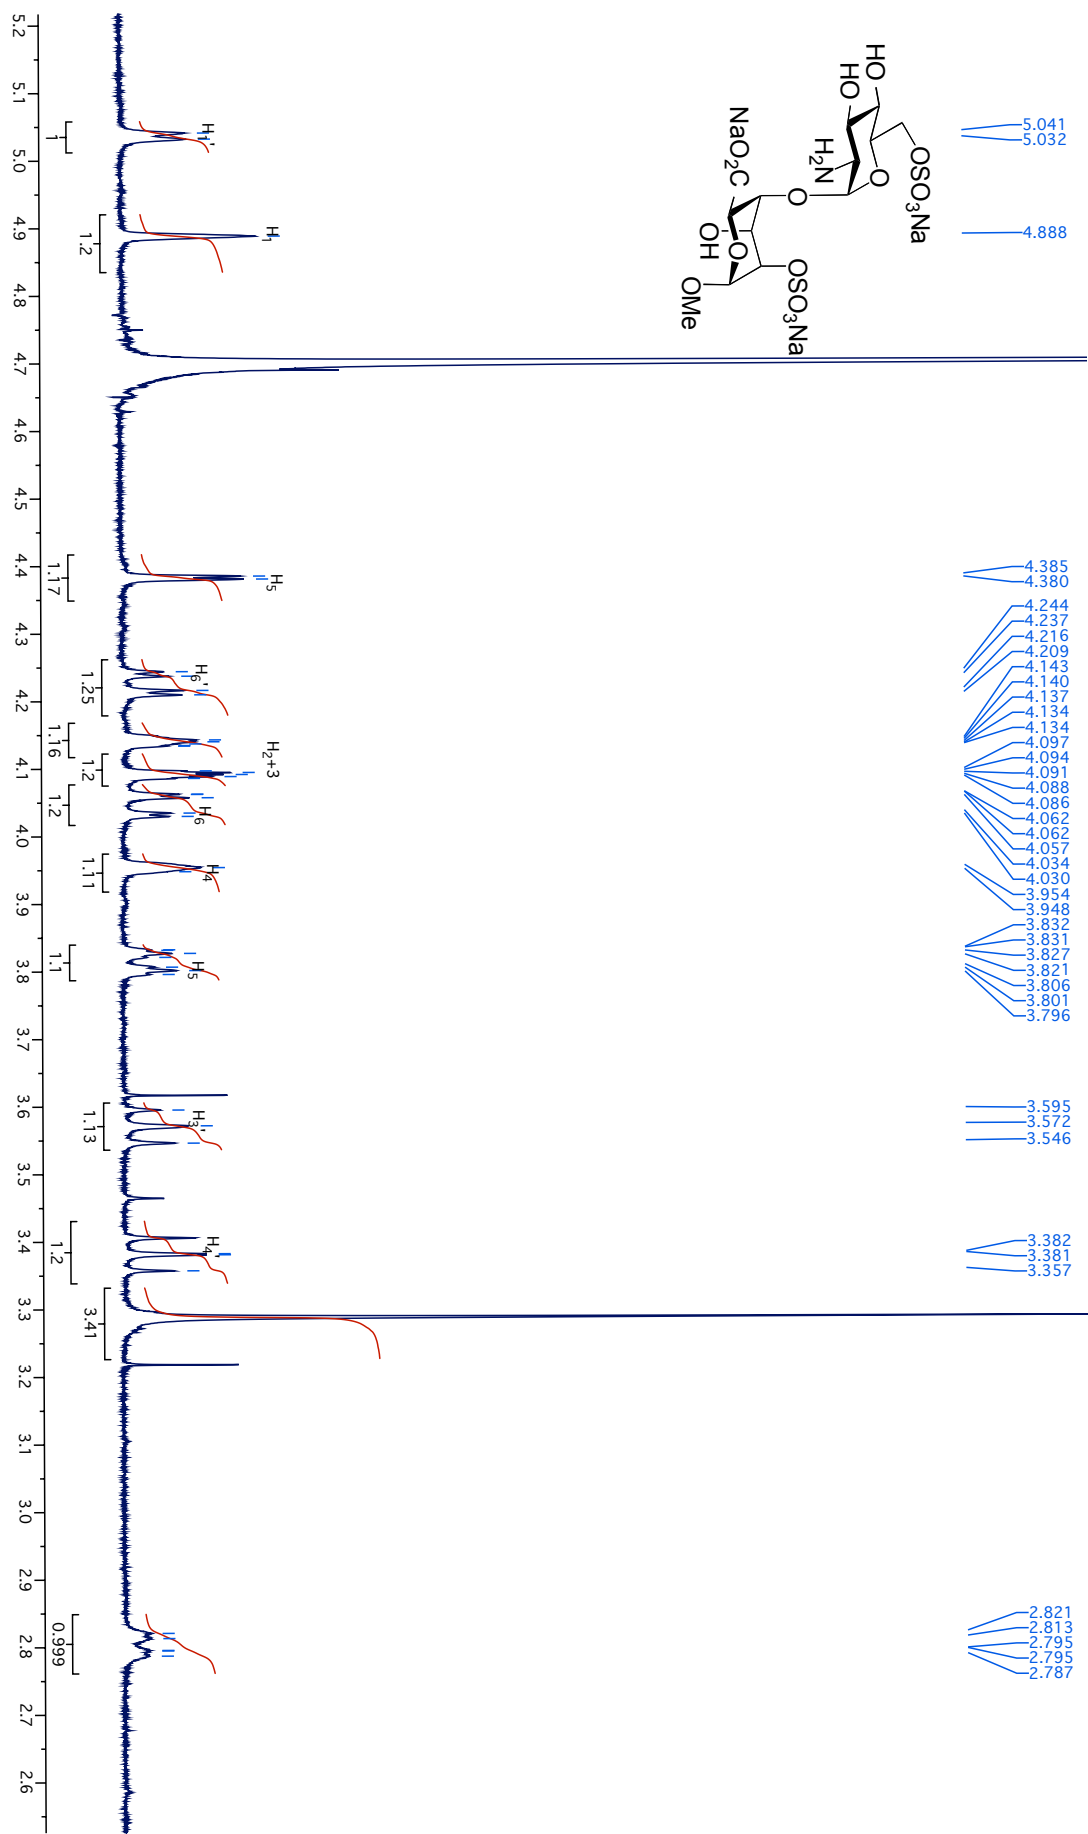

**Methyl-6-O-sulfonato- $\alpha$ -D-glucosaminopyranosyl-(1 $\rightarrow$ 4)-2-O-sulfonato- $\alpha$ -L-idopyranoside uronate tri sodium salt 14**

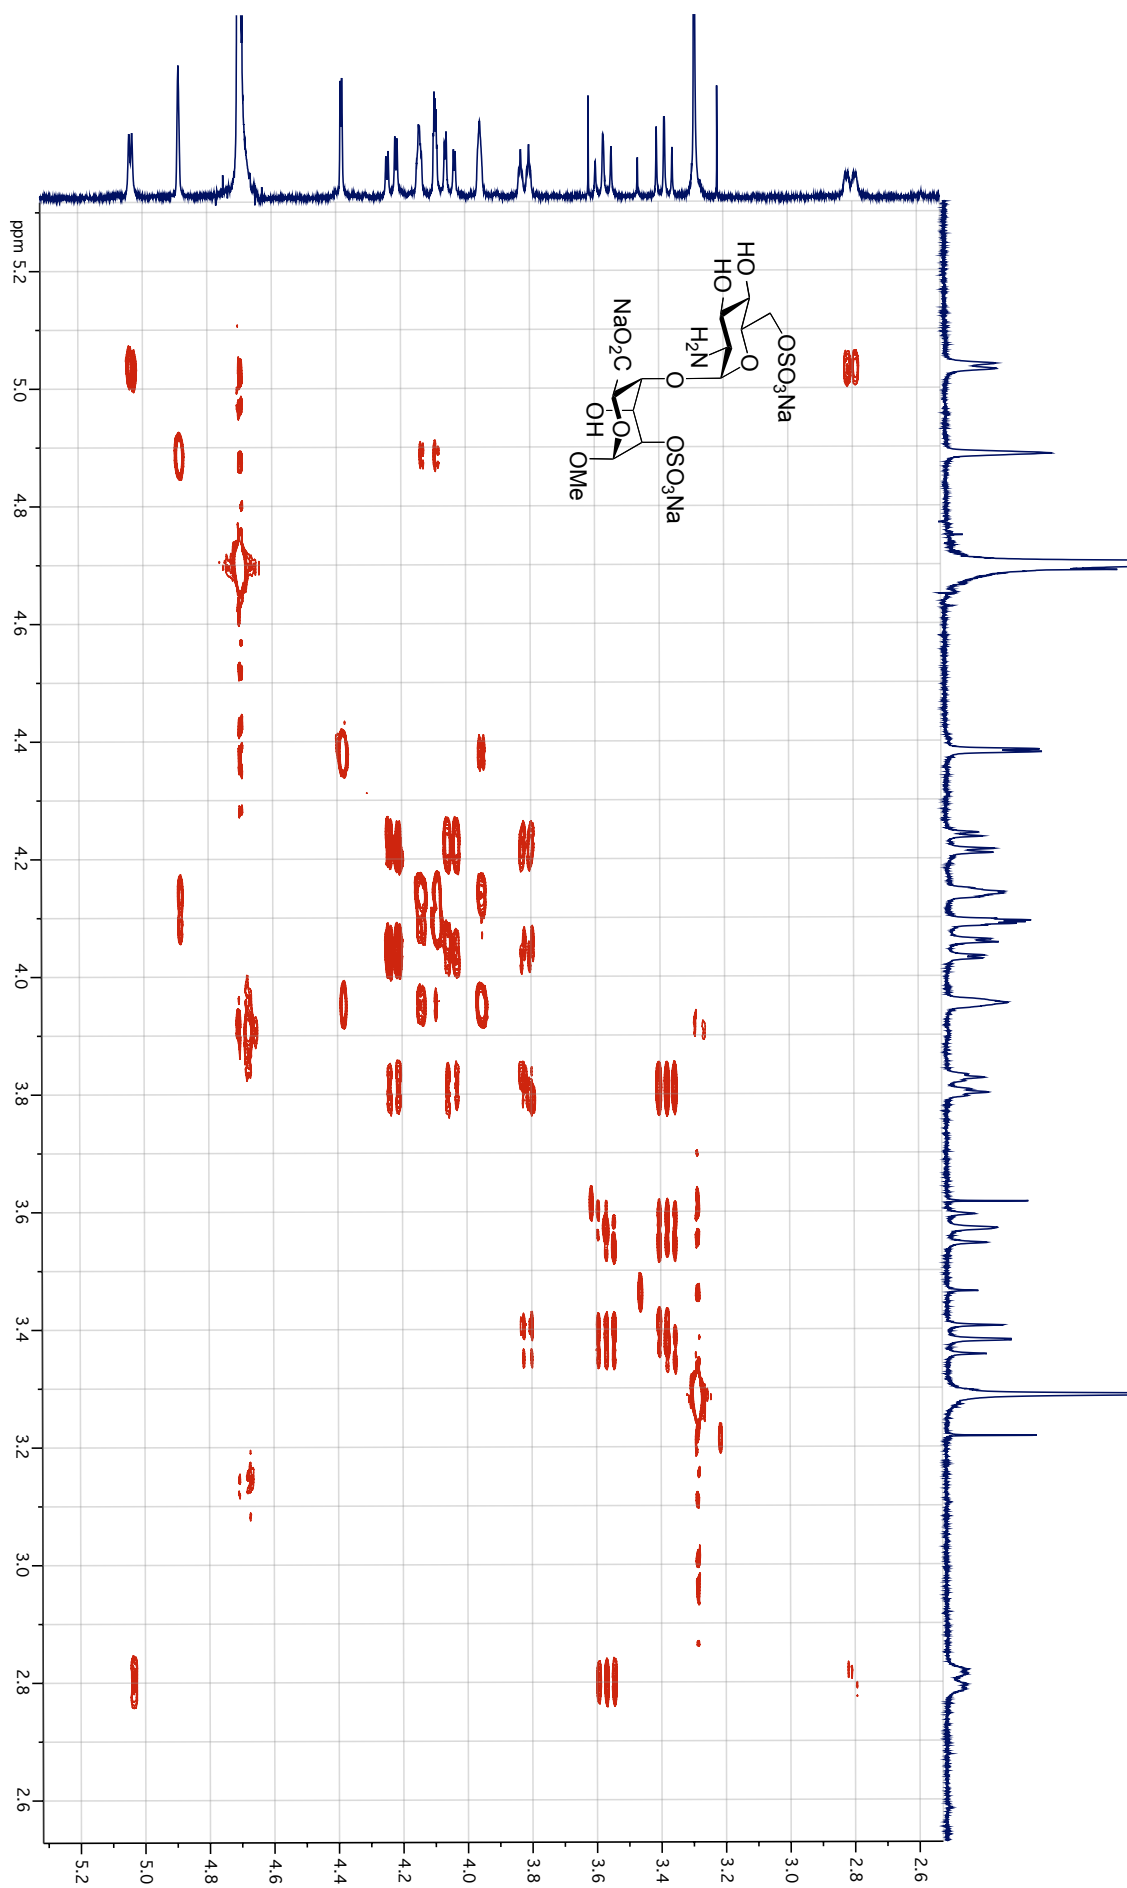

**Methyl- $\alpha$ -D-glucosaminopyranosyl-(1 $\rightarrow$ 4)-2-O-sulfonato- $\alpha$ -L-idopyranoside uronate di sodium salt 15**

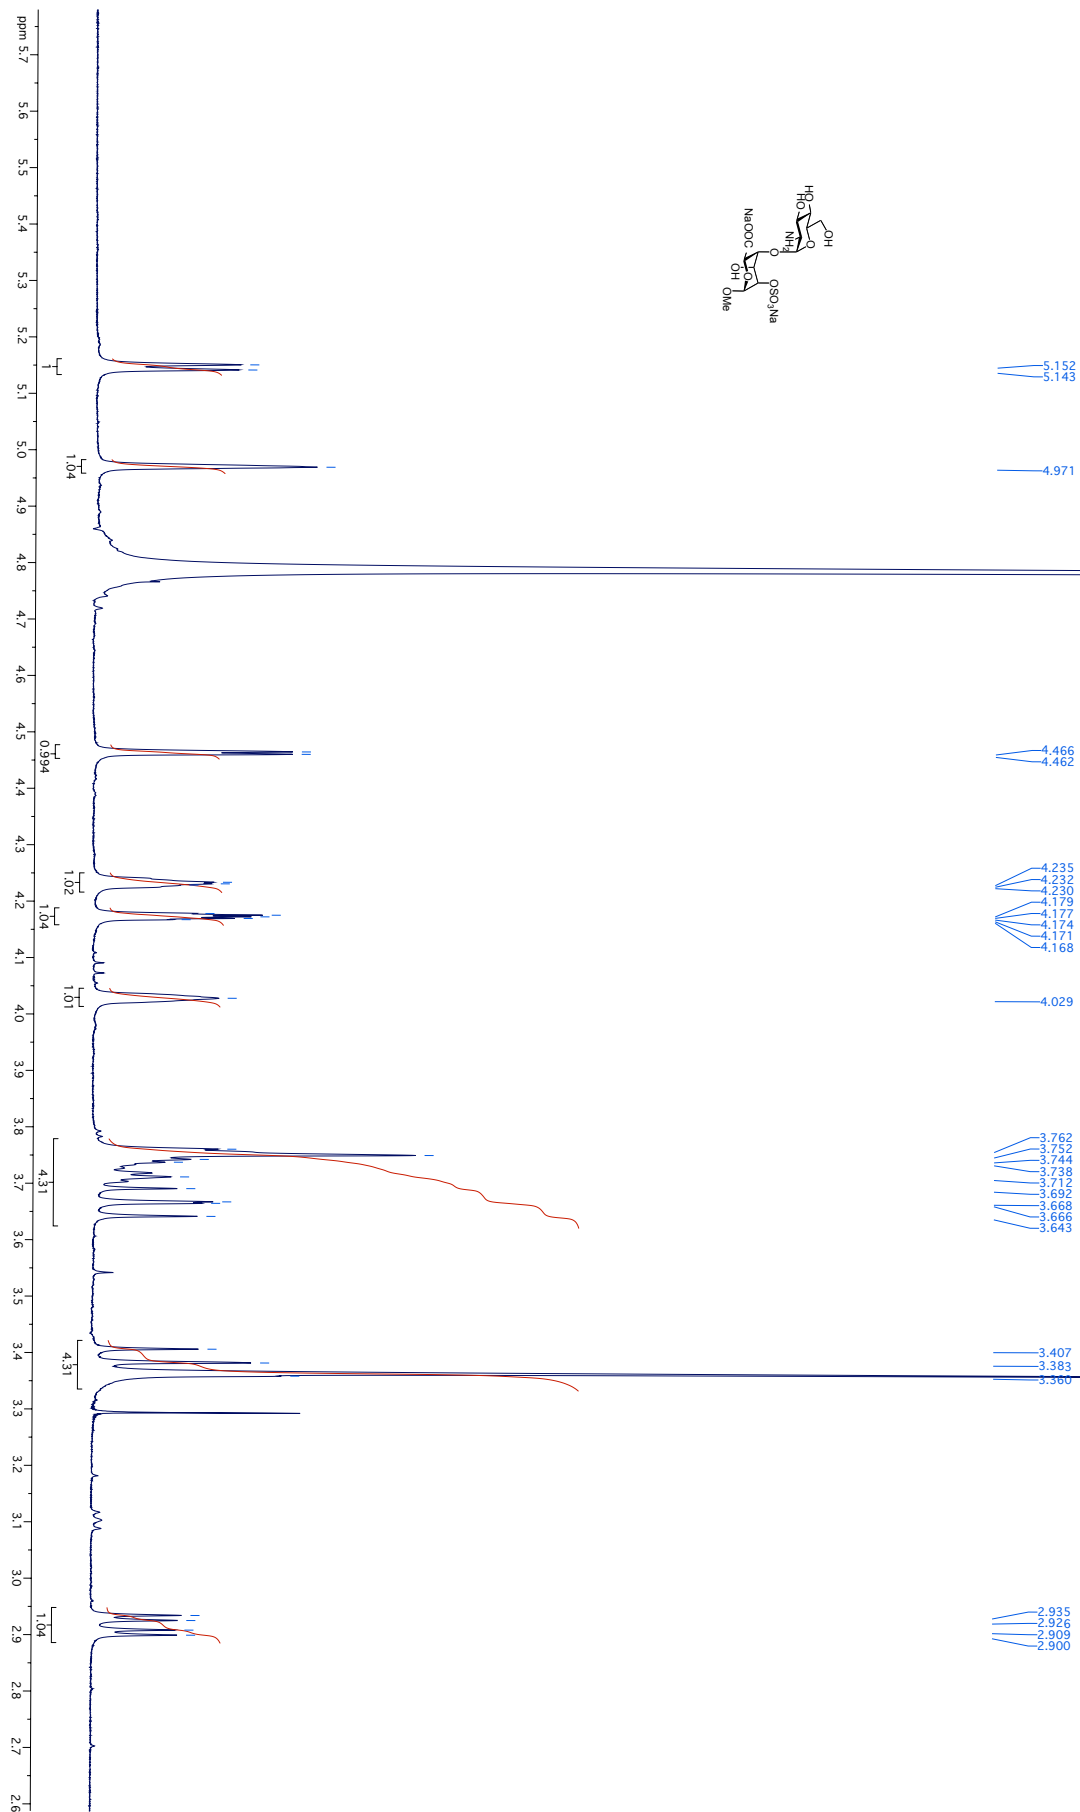

**Methyl- $\alpha$ -D-glucosaminopyranosyl-(1 $\rightarrow$ 4)-2-O-sulfonato- $\alpha$ -L-idopyranoside uronate di sodium salt 15**

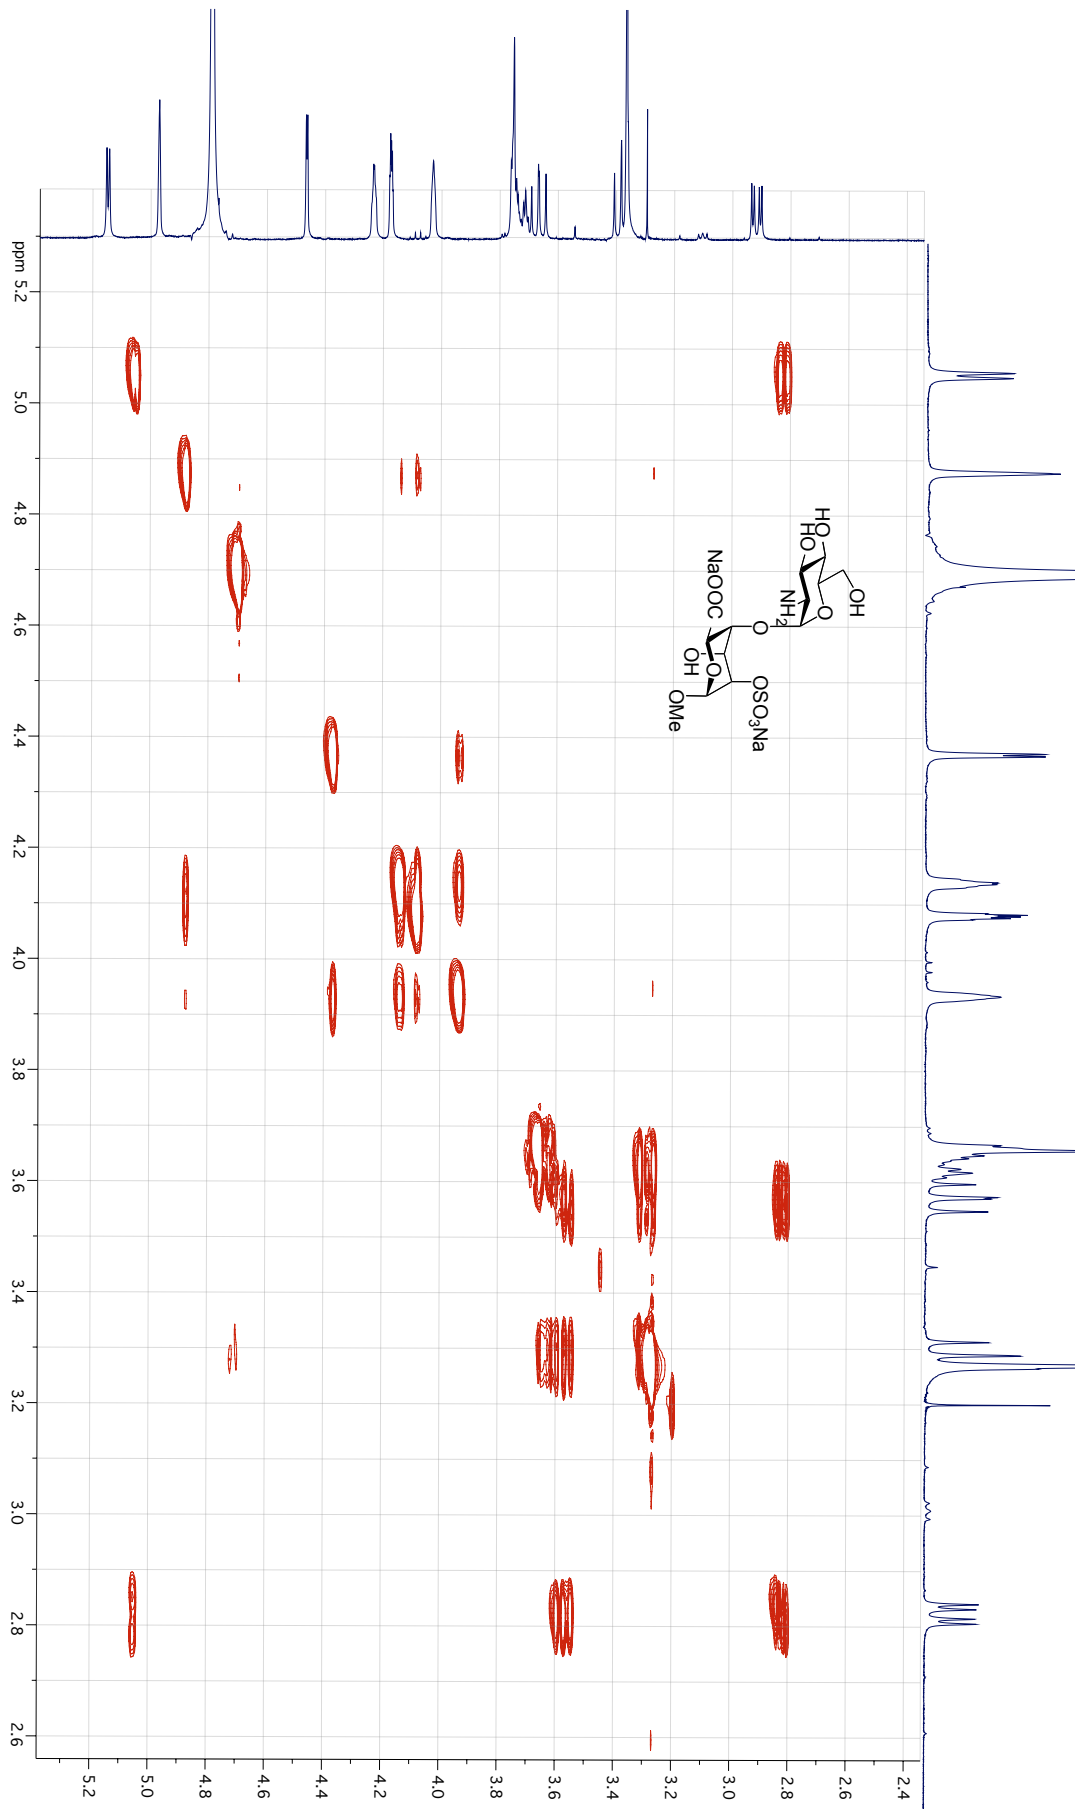

# Methyl- $\alpha$ -D-glucosaminopyranosyl-(1 $\rightarrow$ 4)-2-O-sulfonato- $\alpha$ -L-idopyranoside uronate di sodium salt 15

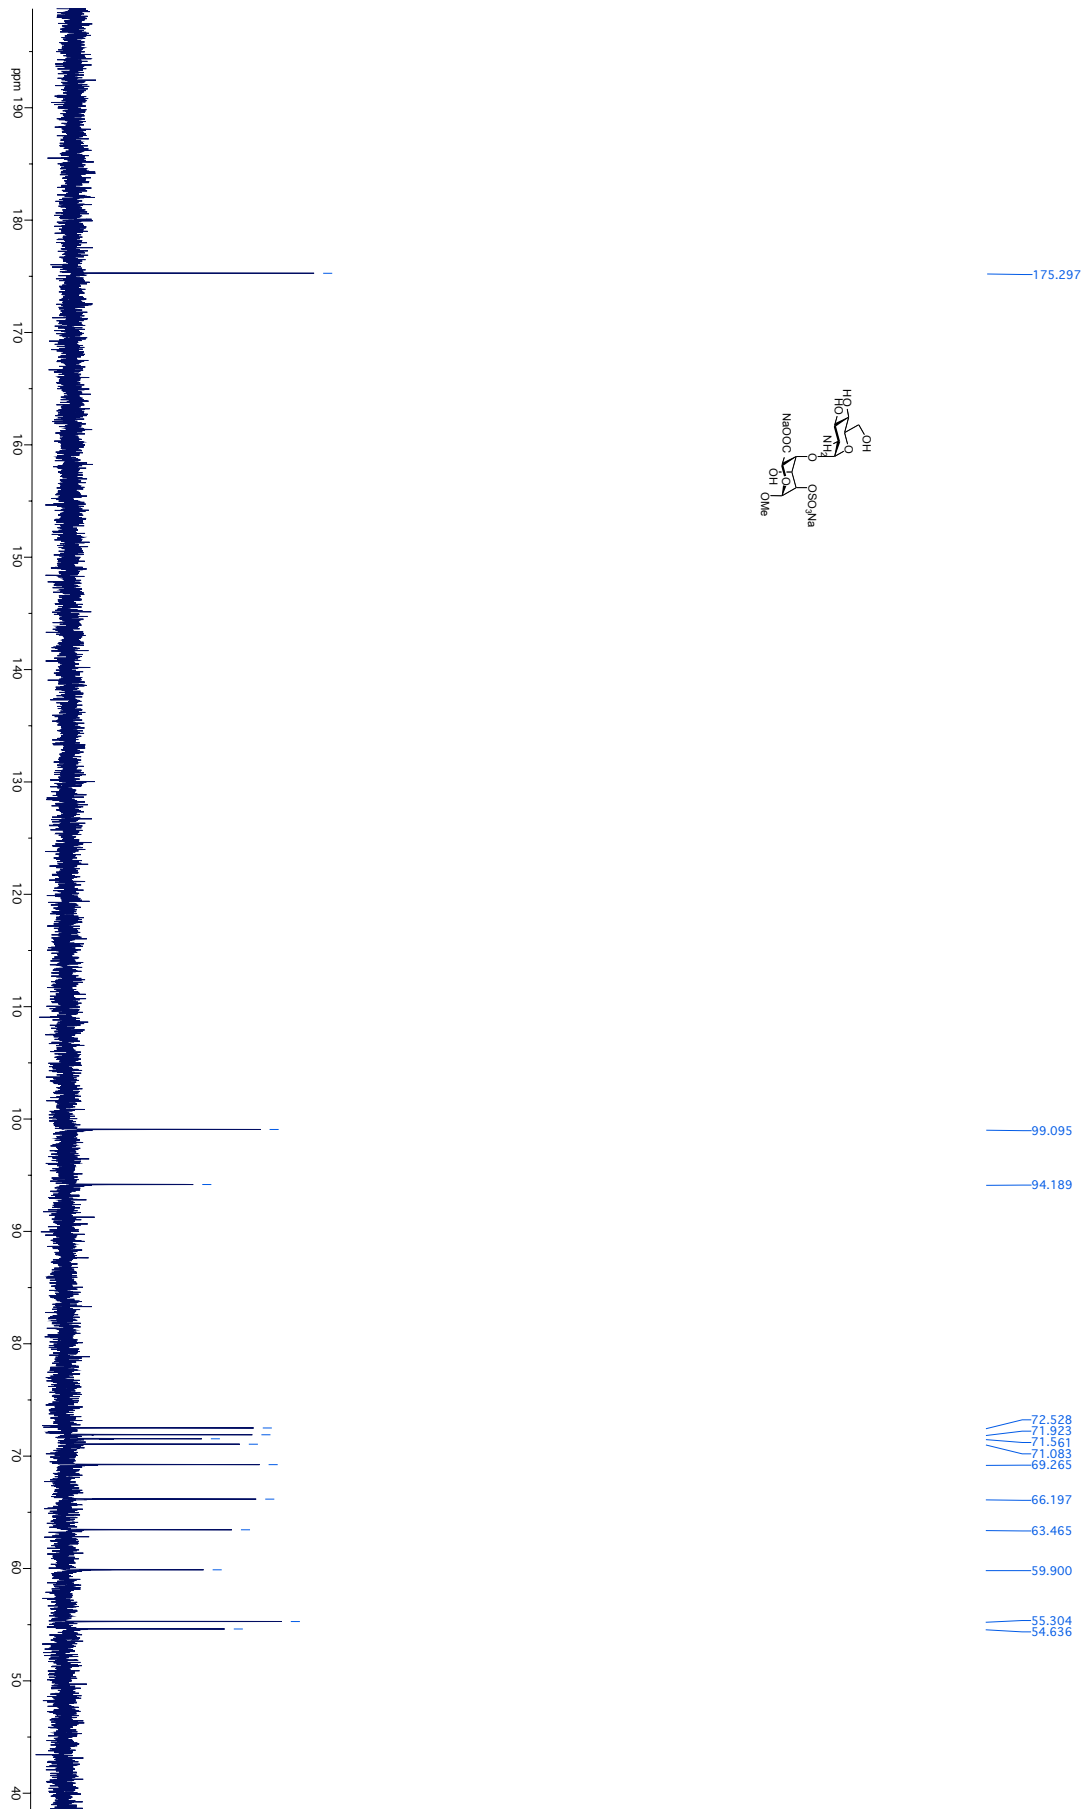

**Methyl-6-O, N-di-sulfonato- $\alpha$ -D-glucosaminopyranosyl-(1 $\rightarrow$ 4)-2-O-sulfonato- $\alpha$ -L-idopyranoside uronate tetra sodium salt 16**

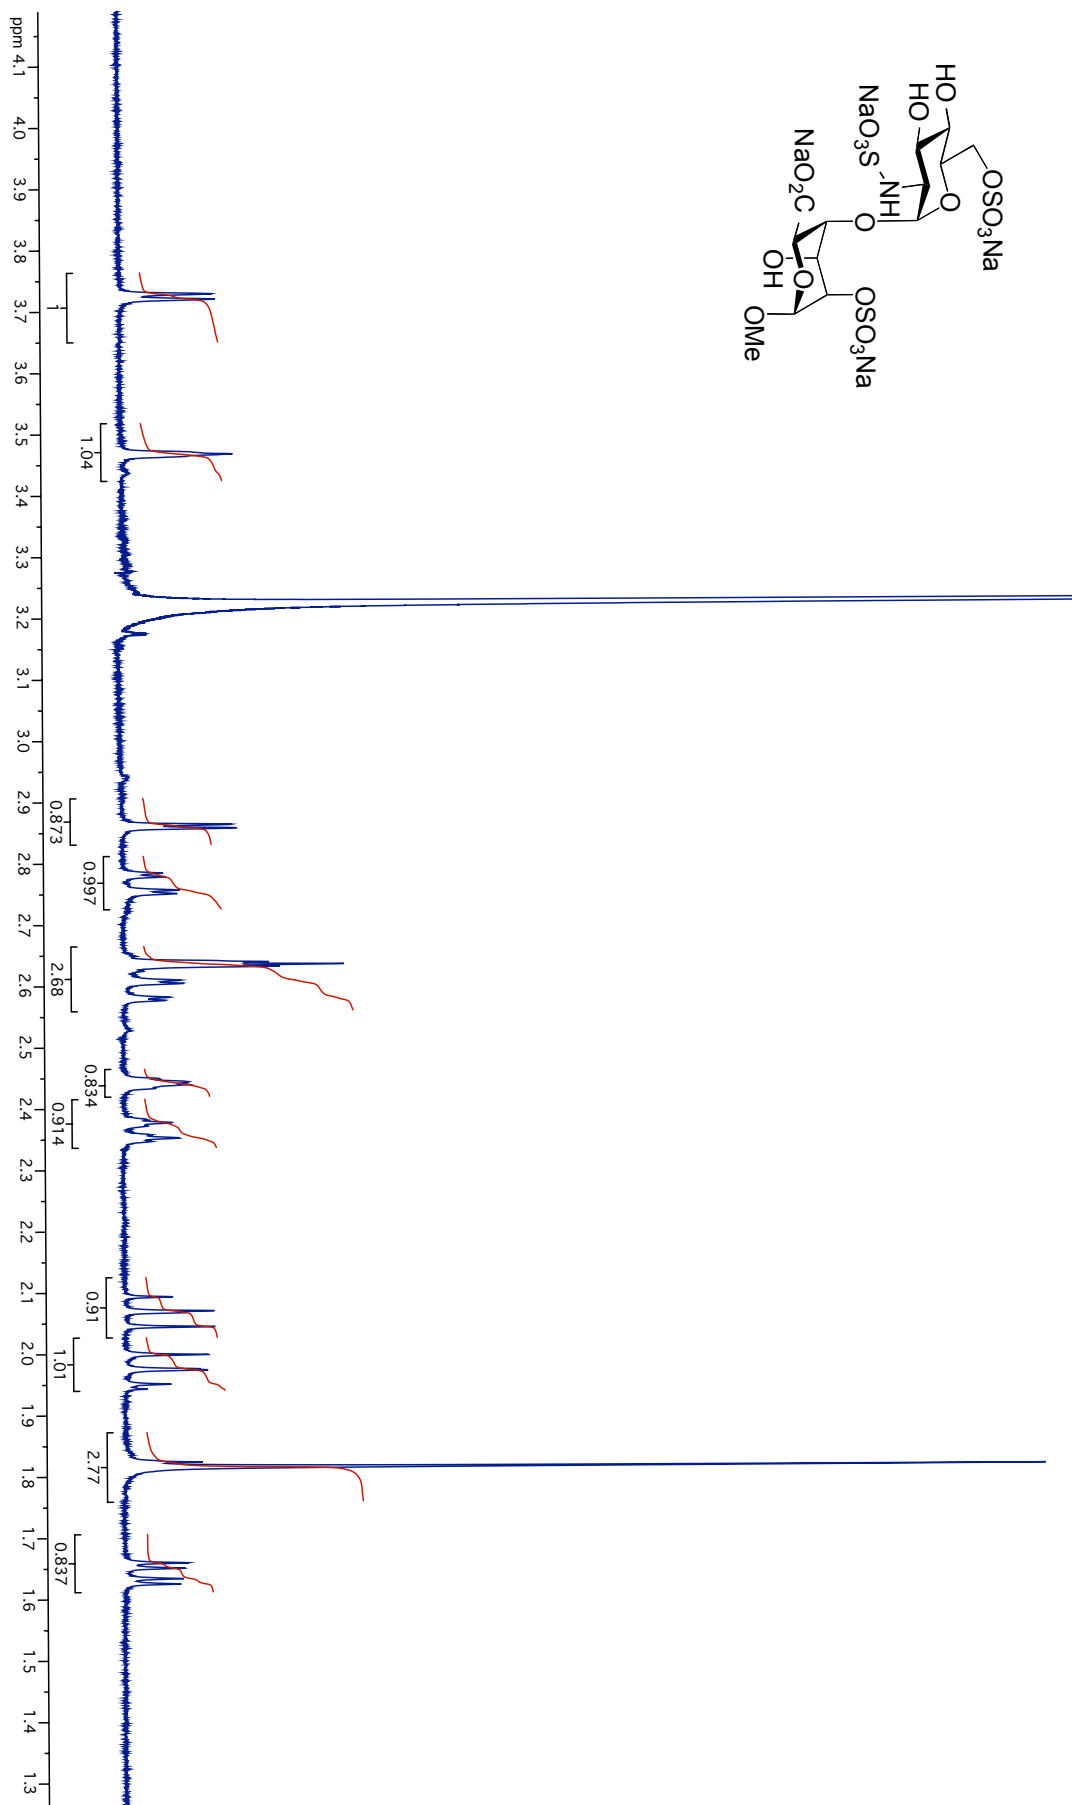

**Methyl-6-O, N-di-sulfonato- $\alpha$ -D-glucosaminopyranosyl-(1 $\rightarrow$ 4)-2-O-sulfonato- $\alpha$ -L-idopyranoside uronate tetra sodium salt 16**

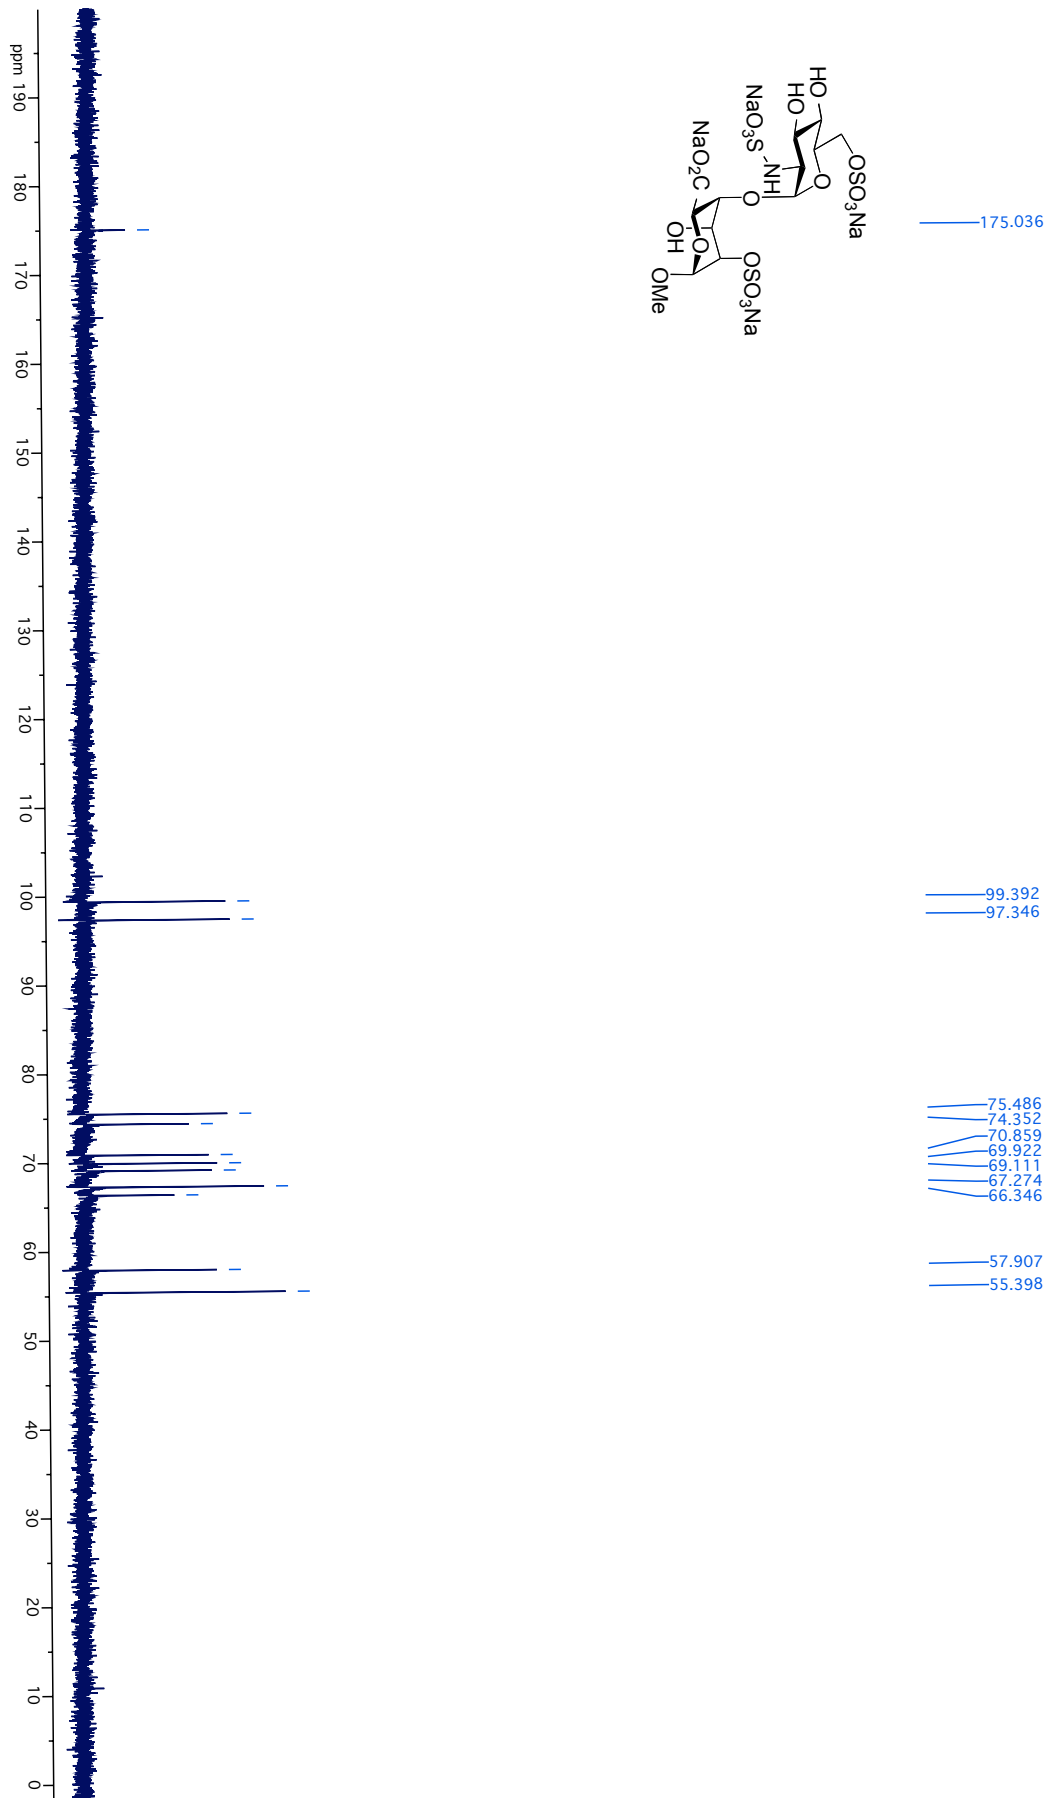



**Methyl-6-O, N-di-sulfonato- $\alpha$ -D-glucosaminopyranosyl-(1 $\rightarrow$ 4)-2-O-sulfonato- $\alpha$ -L-idopyranoside uronate tetra sodium salt 16**

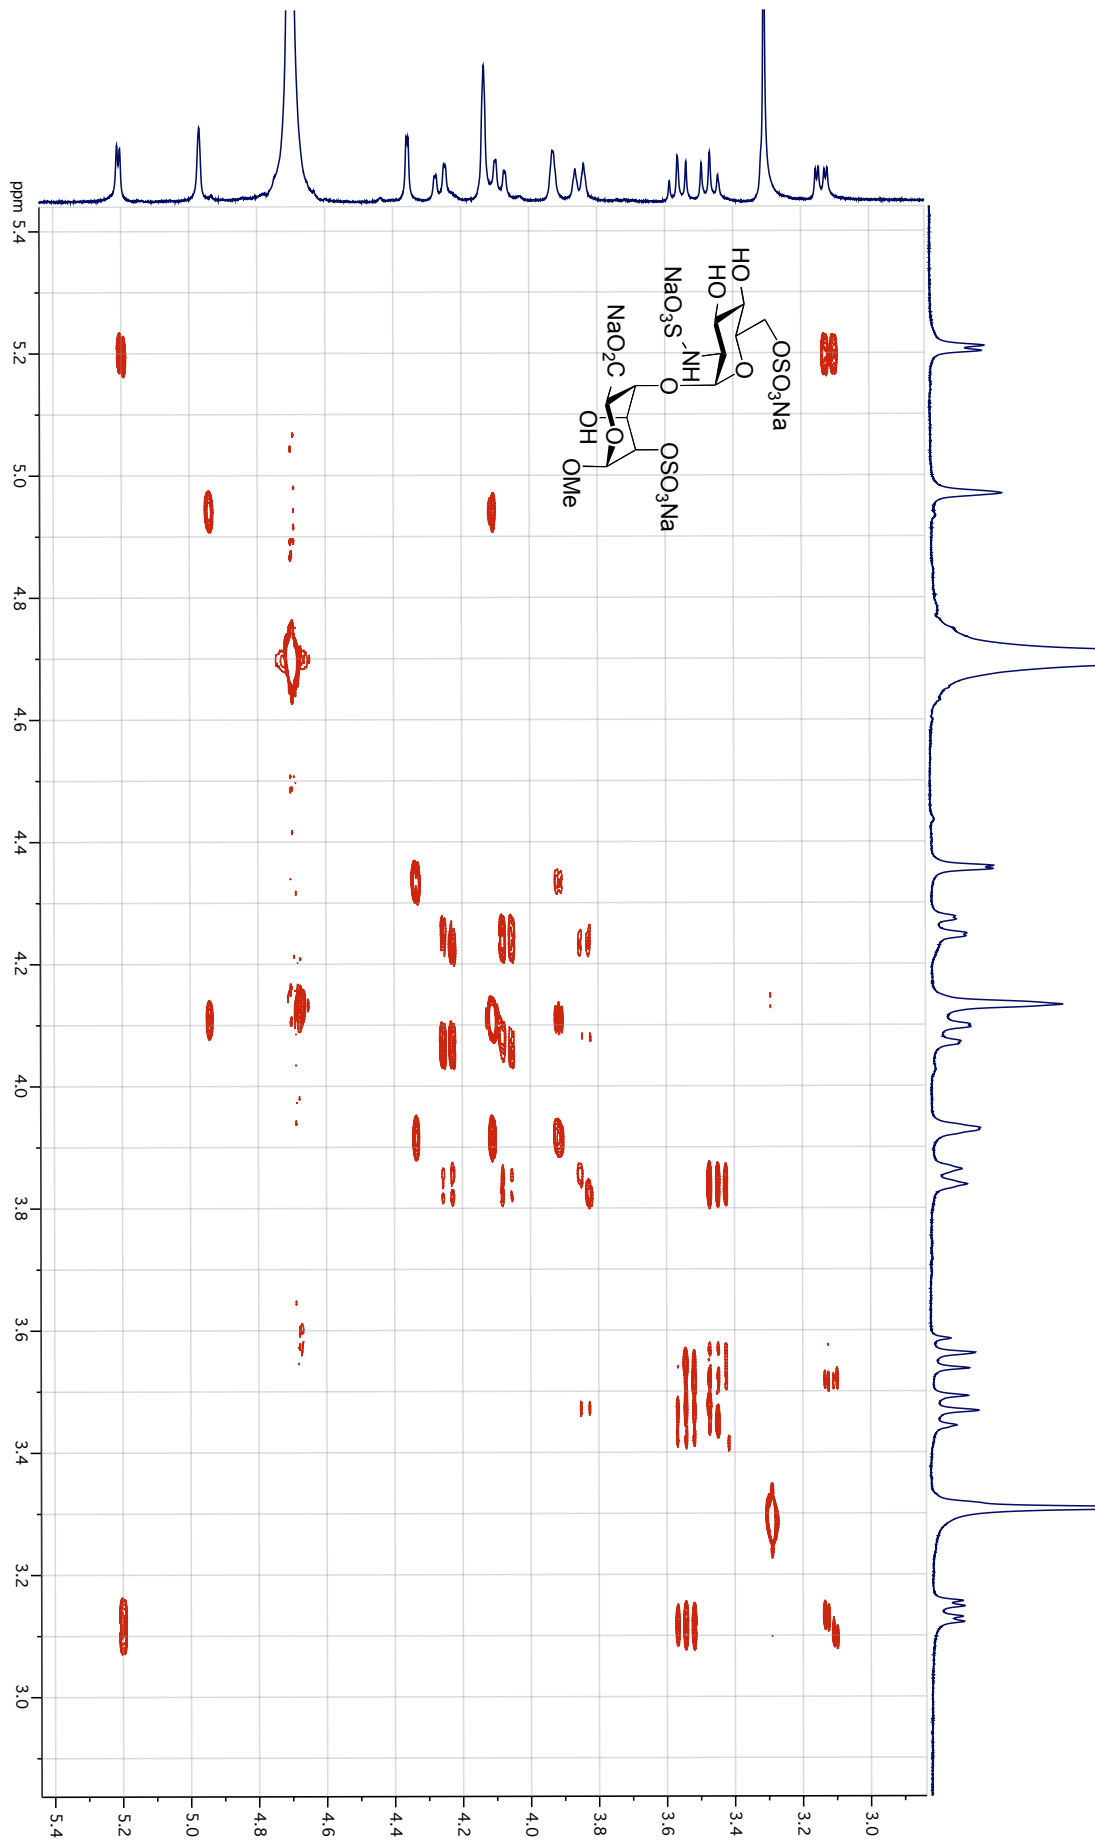

**Methyl-N-sulfonato- $\alpha$ -D-glucosaminopyranosyl-(1 $\rightarrow$ 4)-2-O-sulfonato- $\alpha$ -L-idopyranoside uronate tri sodium salt 17**

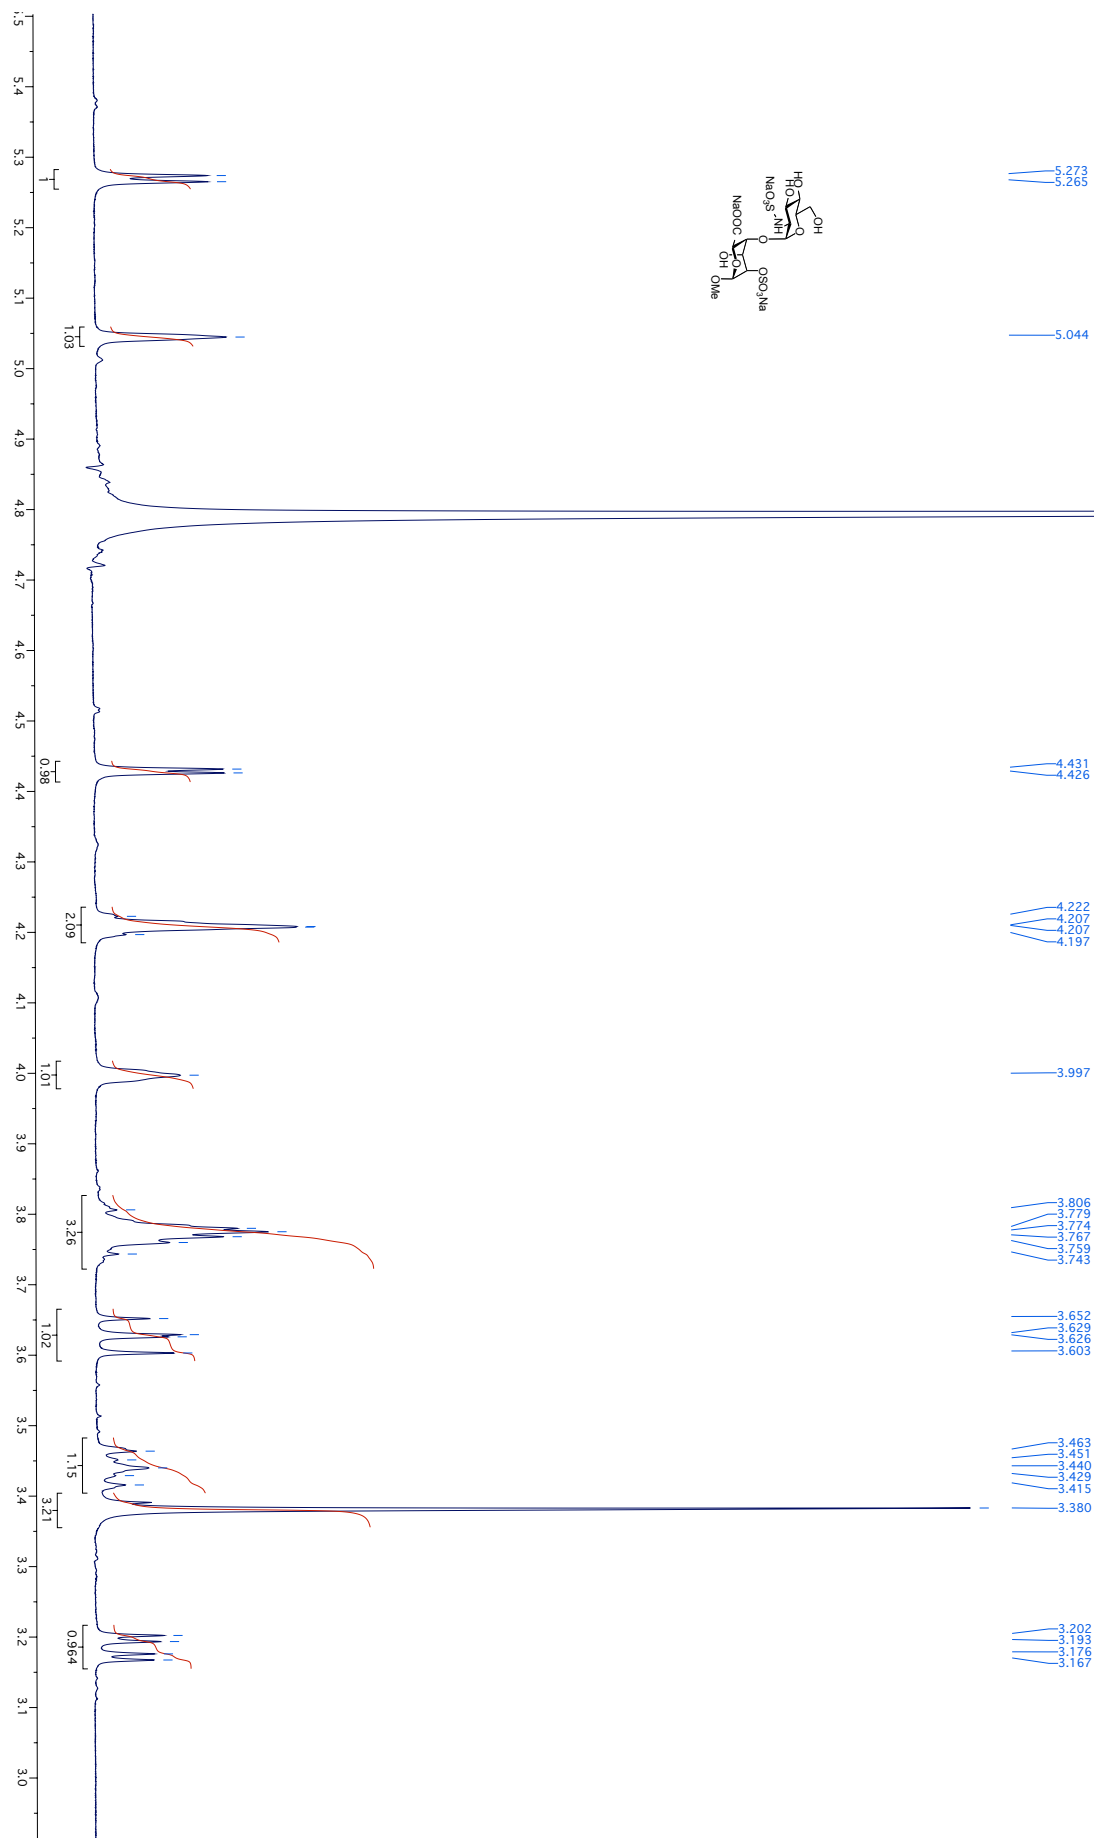

**Methyl-N-sulfonato- $\alpha$ -D-glucosaminopyranosyl-(1 $\rightarrow$ 4)-2-O-sulfonato- $\alpha$ -L-idopyranoside uronate tri sodium salt 17**

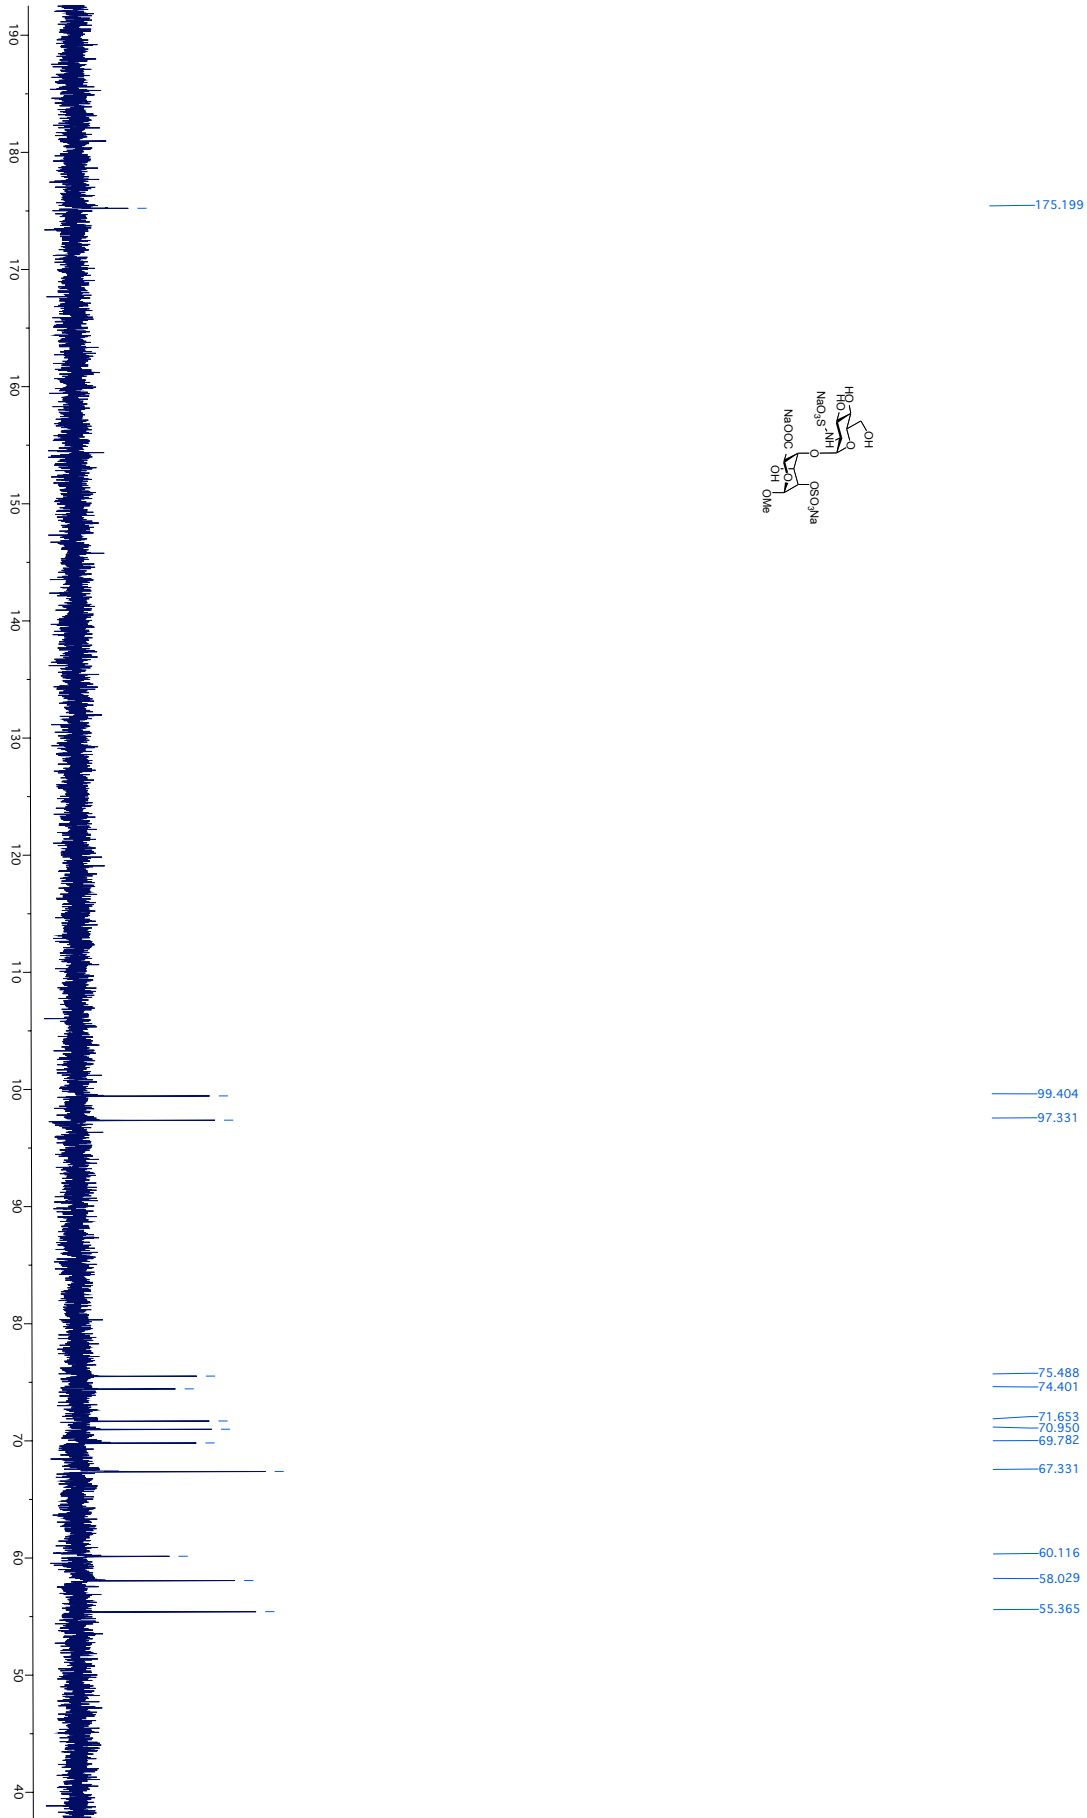

**Methyl-N-sulfonato- $\alpha$ -D-glucosaminopyranosyl-(1 $\rightarrow$ 4)-2-O-sulfonato- $\alpha$ -L-idopyranoside uronate tri sodium salt 17**

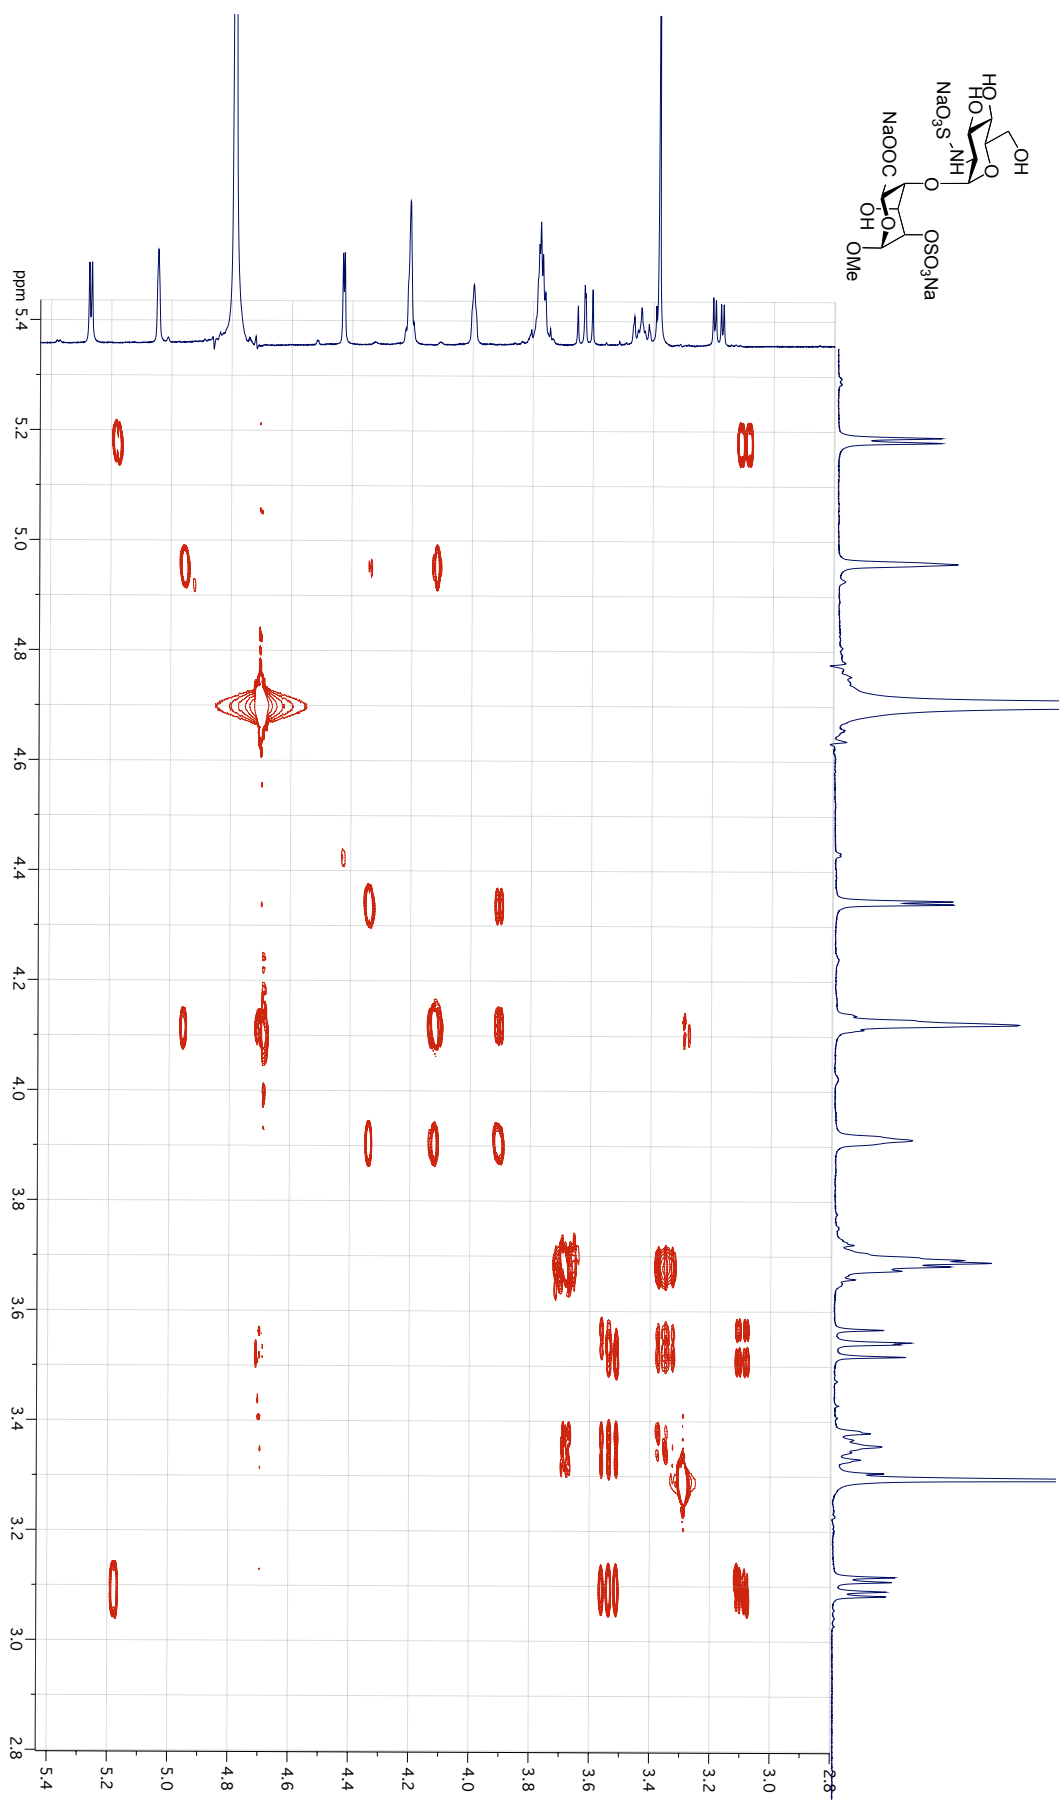

# Methyl- $\alpha$ -D-glucosaminopyranosyl-(1 $\rightarrow$ 4)- $\alpha$ -L-idopyranoside uronate mono sodium salt 18

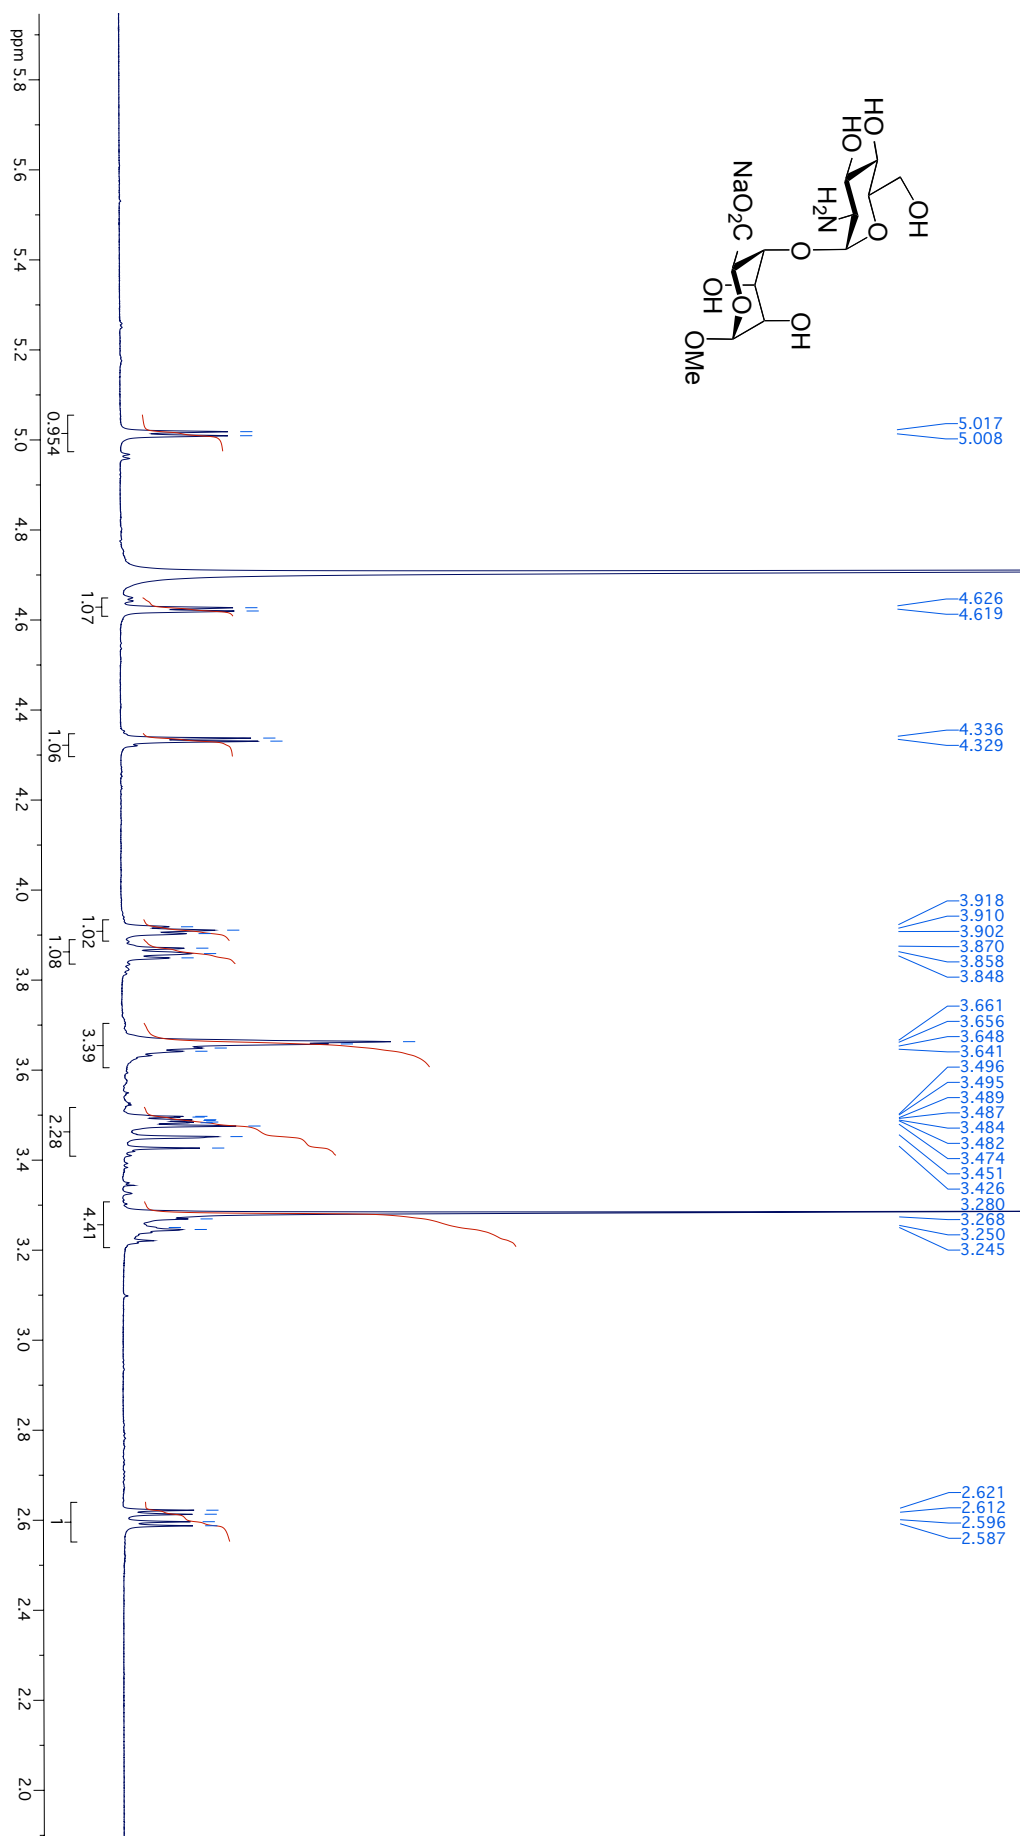

# Methyl- $\alpha$ -D-glucosaminopyranosyl-(1 $\rightarrow$ 4)- $\alpha$ -L-idopyranoside uronate mono sodium salt 18

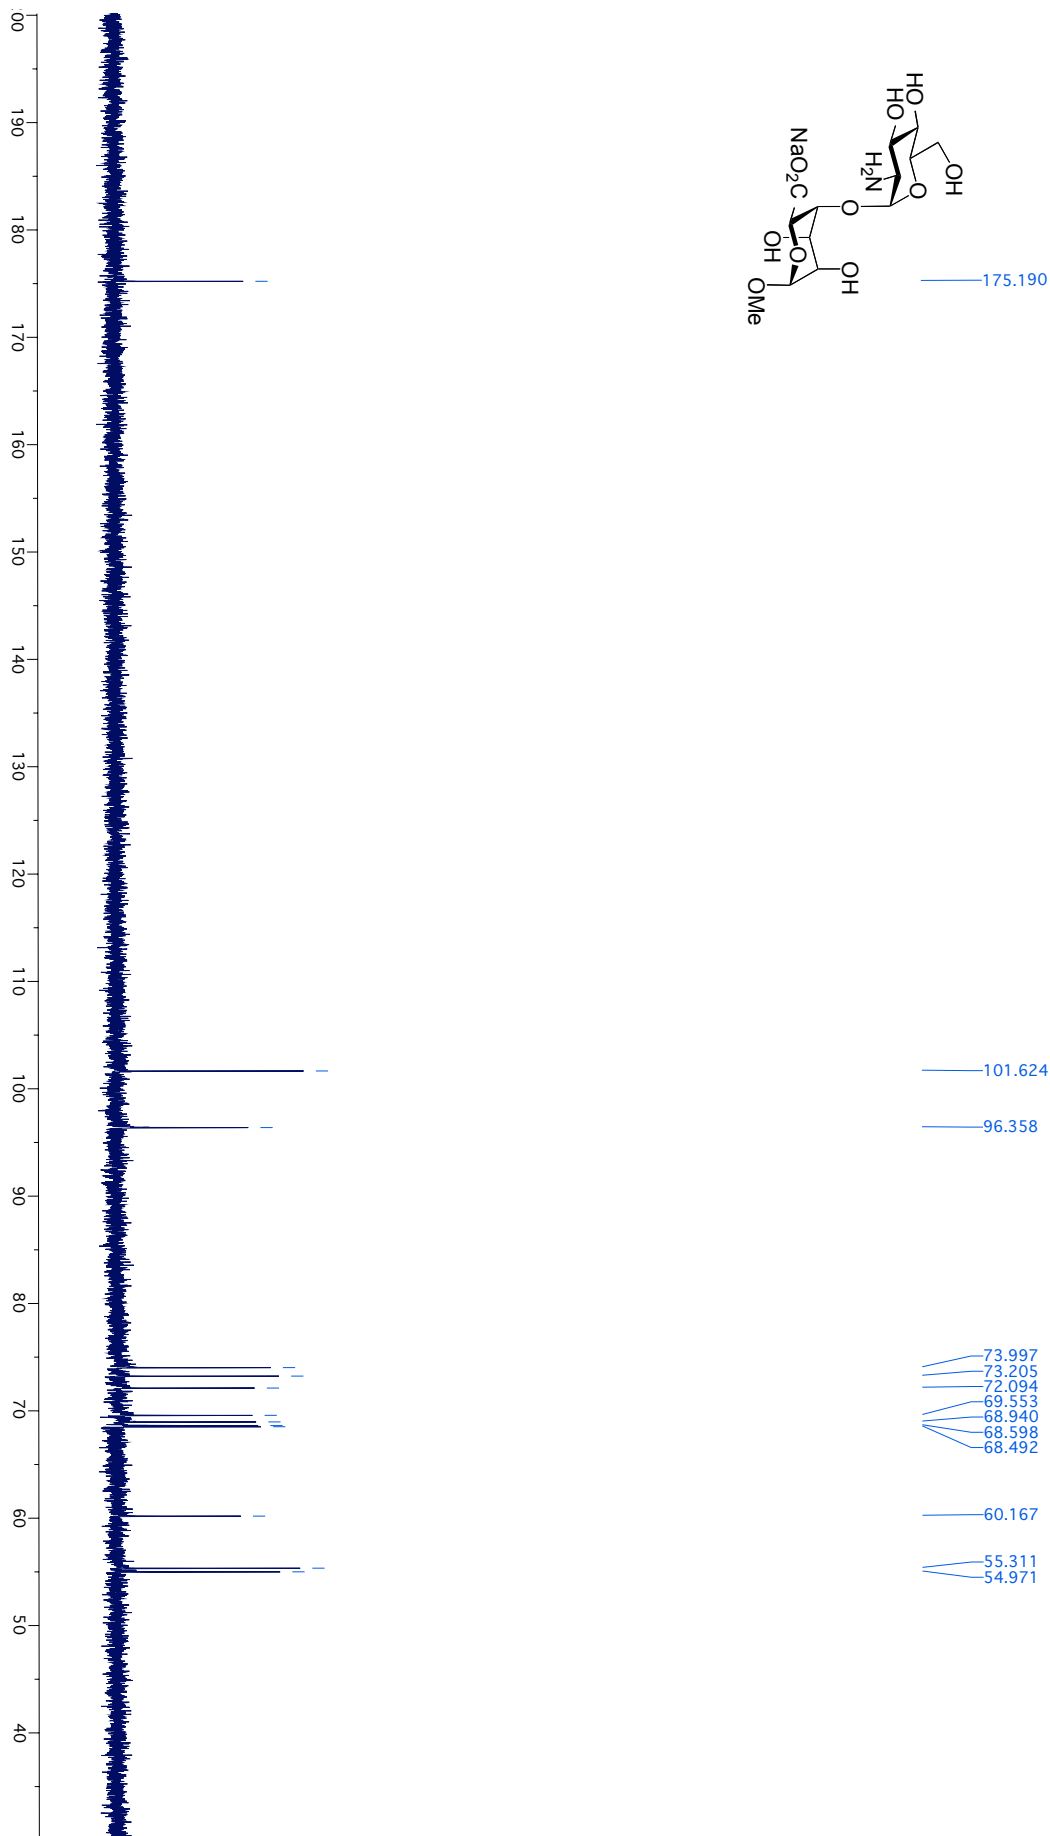

Methyl- $\alpha$ -D-glucosaminopyranosyl-(1 $\rightarrow$ 4)- $\alpha$ -L-idopyranoside uronate mono sodium salt 18

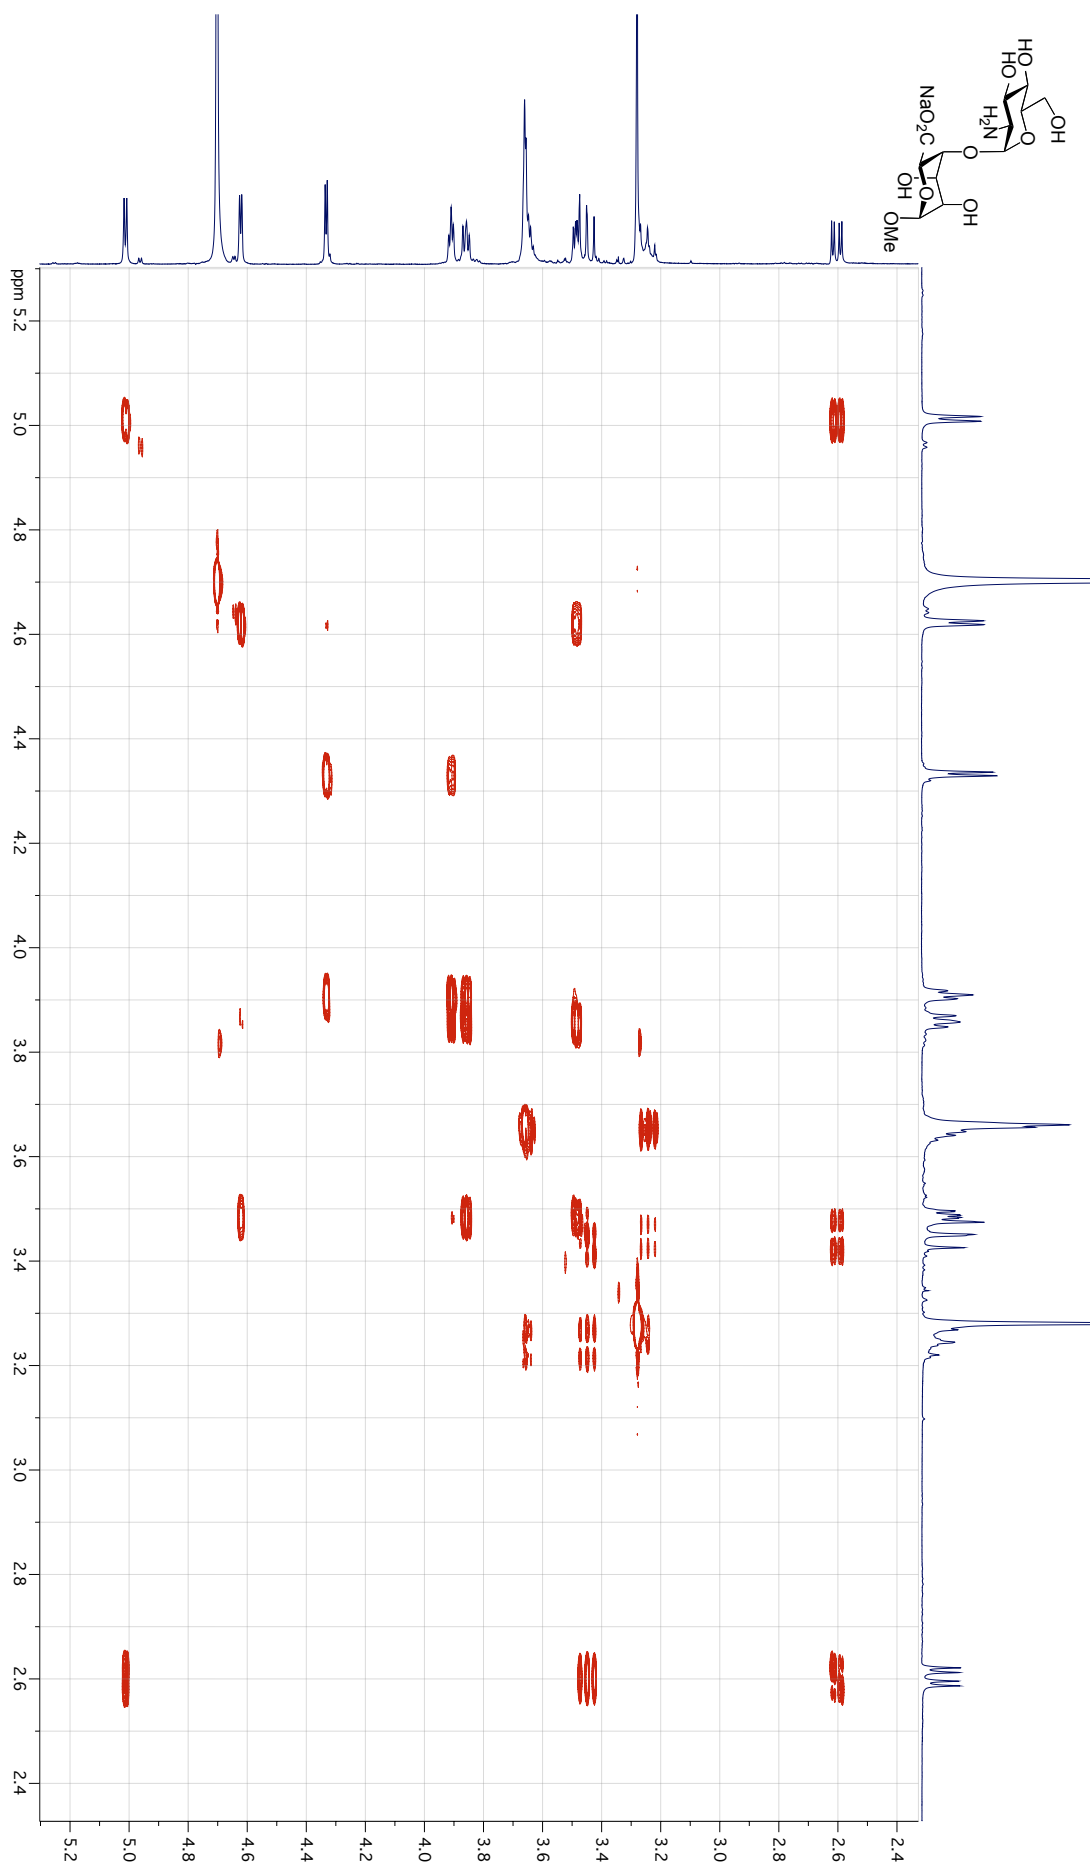

Supplement: mmc1.pdf [file mmc1.pdf]
